# Supplementary material for: Common cell type nomenclature for the mammalian brain
Source: eLife journal article supplement (doi:10.7554/elife.59928), 2020-12-29
Supplement: supp1 [file cell_set_nomenclature.xlsx]

## Sheet: taxonomy ids
Taxonomy id	Description	Reference	Generated	Dend?	Cell matrix?
CCN201810310	Mouse VISp + ALM (from the Allen Institute website and Tasic et al 2018)	(Tasic et al., 2018)	GitHub	Yes	Yes
CCN201908210	Human MTG (from the Allen Institute website and Hodge et al 2019)	(Hodge et al., 2019)	GitHub	Yes	Yes
CCN201908211	Joint mouse/human analysis (slight modification from Hodge et al 2019)	(Hodge et al., 2019)	GitHub	Yes	Yes
CCN201912131	Human M1 transcriptomics taxonomy	(Bakken et al., 2020)	Manual	No	No
CCN201912132	Marmoset M1 taxonomy using 10X data	(Bakken et al., 2020)	Manual	No	No
CCN202002013	Mouse MOp BICCN taxonomy using multiple RNA-Seq datasets	(Yao et al., 2020a)	GitHub	Yes	No
CCN202002270	Cross species (integrated) transcriptomics taxonomy; This is the reference taxonomy!	(Bakken et al., 2020)	Manual	No	No
CCN202002271	Macaque transcriptomics taxonomy, layer 5/6 only	(Bakken et al., 2020)	Manual	No	No
CCN202002272	Human DNA methylation taxonomy	(Bakken et al., 2020)	Manual	No	No
CCN202002273	Human ATAC-seq taxonomy	(Bakken et al., 2020)	Manual	No	No
CCN202002274	Marmoset DNA methylation taxonomy	(Bakken et al., 2020)	Manual	No	No
CCN202002275	Marmoset ATAC-seq taxonomy	(Bakken et al., 2020)	Manual	No	No
CCN202002276	Mouse DNA methylation taxonomy	(Yao et al., 2020a)	Manual	No	No
CCN202002277	Mouse ATAC-seq taxonomy	(Yao et al., 2020a)	Manual	No	No
CCN202005150	Mouse inhibitory neurons in VISp defined using electrophysiology, morphology, and transcriptomics.	(Gouwens et al., 2020)	Partly both	No	Yes
CCN201906170	Mouse neurons in VISp defined using electrophysiology and morphology.	(Gouwens et al., 2019)	Manual	No	No
CCN201805250	Turtle pallium transcriptomics taxonomy	(Tosches et al., 2018)	Manual	No	No

## Sheet: aligned aliases
Preferred aliases	Alternative aliases / Description / Notes
Lamp5	(ILX:0770149)
Lamp5 Lhx6	A distinct Lamp5 type also expressing the MGE marker Lhx6
Sncg	(ILX:0770150)
Vip	(ILX:0770151)
Sst Chodl	A very distinct Sst type expressing the gene Chodl in mouse; the only reported long-range projecting GABAergic type (ILX:0770153)
Sst	(ILX:0770152)
Pvalb	Includes basket and chandelier cells (ILX:0770154)
Chandelier
Meis2	A very distinct GABAergic type expressing the gene Meis2 in mouse
CR	Cajal Retzius
L2/3 IT	Intratelencephalic (ILX:0770156)
L4	Intratelencephalic; sparsely present in M1
L5 IT	Intratelencephalic (ILX:0770157)
L6 IT	Intratelencephalic (ILX:0770158)
L6 IT Car3	Intratelencephalic, a specific cell type expressing the gene Car3 in mouse (ILX:0770159)
L5 ET	Extratelencephalic; also known as CF (corticofugal), PT (pyramidal tract), or SC (subcortical) (ILX:0770160)
L5/6 NP	Near-projecting (ILX:0770161)
L6 CT	Corticothalamic (ILX:0770162)
L6b	(ILX:0770163)
OPC	Oligodendrocyte precursor cell (ILX:0770139)
Astrocyte	Astrocyte (often abbreviated “Astro”) (ILX:0770141)
Oligodendrocyte	Oligodendrocyte (often abbreviated “Oligo”) (ILX:0770140)
Endothelial	Endothelial cell (often abbreviated “Endo”) (ILX:0770142)
VLMC	Vascular leptomeningeal cell (ILX:0770143)
SMC	Smooth muscle cell (ILX:0770144)
Pericyte	Pericyte (often abbreviated “Peri”) (ILX:0770145)
Microglia	Microglia (often abbreviated “Micro”) (ILX:0770146)
PVM	Perivascular macrophage (ILX:0770147)
Microglia-PVM	Microglia (often abbreviated “Micro”) / Perivascular macrophage
GABAergic	Typically inhibitory (ILX:0770098)
Glutamatergic	Typically excitatory (ILX:0770097)
Non-neuronal	Sometimes abbreviated “NN”; also referred to as “glia” in cases when no non-neuronal, non-glial cell types are included (ILX:0770099)
CGE/PoA	Caudal ganglionic eminence / Preoptic area
MGE	Medial ganglionic eminence
IT projecting	(ILX:0770100)
Non-IT projecting
Oligodendrocyte-OPC	Oligodendrocyte (often abbreviated “Oligo”) / Oligodendrocyte precursor cell
Other NN	Cells other than neurons, astrocytes, OPCs, or oligodendrocytes; also referred to as non-neural brain cell (ILX:0770187)

## Sheet: cell set nomenclature
cell_set_preferred_alias	cell_set_ label	cell_set_ accession	cell_set_ aligned_alias	cell_set_ additional_alias	cell_set_ alias_assignee	cell_set_ alias_citation	cell_set_ structure	cell_set_ ontology_tag	taxonomy_id	species	modality
Inh L1 LAMP5 PVRL2	RNAseq 001	CS201912131_1		Lamp5_1	Nikolas Jorstad	10.1101/2020.03.31.016972	primary motor cortex	UBERON:0001384	CCN201912131	Human	RNAseq
Inh L1 LAMP5 RAB11FIP1	RNAseq 002	CS201912131_2			Nikolas Jorstad	10.1101/2020.03.31.016972	primary motor cortex	UBERON:0001384	CCN201912131	Human	RNAseq
Inh L1-6 LAMP5 AARD	RNAseq 003	CS201912131_3			Nikolas Jorstad	10.1101/2020.03.31.016972	primary motor cortex	UBERON:0001384	CCN201912131	Human	RNAseq
Inh L1-6 LAMP5 NES	RNAseq 004	CS201912131_4			Nikolas Jorstad	10.1101/2020.03.31.016972	primary motor cortex	UBERON:0001384	CCN201912131	Human	RNAseq
Inh L1-6 LAMP5 CA1	RNAseq 005	CS201912131_5			Nikolas Jorstad	10.1101/2020.03.31.016972	primary motor cortex	UBERON:0001384	CCN201912131	Human	RNAseq
Inh L5-6 LAMP5 CRABP1	RNAseq 006	CS201912131_6			Nikolas Jorstad	10.1101/2020.03.31.016972	primary motor cortex	UBERON:0001384	CCN201912131	Human	RNAseq
Inh L3-6 PAX6 LINC01497	RNAseq 007	CS201912131_7			Nikolas Jorstad	10.1101/2020.03.31.016972	primary motor cortex	UBERON:0001384	CCN201912131	Human	RNAseq
Inh L1 PAX6 MIR101-1	RNAseq 008	CS201912131_8			Nikolas Jorstad	10.1101/2020.03.31.016972	primary motor cortex	UBERON:0001384	CCN201912131	Human	RNAseq
Inh L1 PAX6 CHRFAM7A	RNAseq 009	CS201912131_9			Nikolas Jorstad	10.1101/2020.03.31.016972	primary motor cortex	UBERON:0001384	CCN201912131	Human	RNAseq
Inh L1-6 VIP SLC7A6OS	RNAseq 010	CS201912131_10			Nikolas Jorstad	10.1101/2020.03.31.016972	primary motor cortex	UBERON:0001384	CCN201912131	Human	RNAseq
Inh L2 PAX6 FREM2	RNAseq 011	CS201912131_11		Sncg_2	Nikolas Jorstad	10.1101/2020.03.31.016972	primary motor cortex	UBERON:0001384	CCN201912131	Human	RNAseq
Inh L1-2 VIP HTR3A	RNAseq 012	CS201912131_12			Nikolas Jorstad	10.1101/2020.03.31.016972	primary motor cortex	UBERON:0001384	CCN201912131	Human	RNAseq
Inh L1-2 VIP WNT4	RNAseq 013	CS201912131_13			Nikolas Jorstad	10.1101/2020.03.31.016972	primary motor cortex	UBERON:0001384	CCN201912131	Human	RNAseq
Inh L1 LAMP5 BMP2	RNAseq 014	CS201912131_14			Nikolas Jorstad	10.1101/2020.03.31.016972	primary motor cortex	UBERON:0001384	CCN201912131	Human	RNAseq
Inh L1 LAMP5 NMBR	RNAseq 015	CS201912131_15			Nikolas Jorstad	10.1101/2020.03.31.016972	primary motor cortex	UBERON:0001384	CCN201912131	Human	RNAseq
Inh L1 PVALB SST ASIC4	RNAseq 016	CS201912131_16			Nikolas Jorstad	10.1101/2020.03.31.016972	primary motor cortex	UBERON:0001384	CCN201912131	Human	RNAseq
Inh L1 SST P4HA3	RNAseq 017	CS201912131_17			Nikolas Jorstad	10.1101/2020.03.31.016972	primary motor cortex	UBERON:0001384	CCN201912131	Human	RNAseq
Inh L1 SST DEFB108B	RNAseq 018	CS201912131_18			Nikolas Jorstad	10.1101/2020.03.31.016972	primary motor cortex	UBERON:0001384	CCN201912131	Human	RNAseq
Inh L1-3 VIP CBLN1	RNAseq 019	CS201912131_19			Nikolas Jorstad	10.1101/2020.03.31.016972	primary motor cortex	UBERON:0001384	CCN201912131	Human	RNAseq
Inh L1-2 VIP EXPH5	RNAseq 020	CS201912131_20			Nikolas Jorstad	10.1101/2020.03.31.016972	primary motor cortex	UBERON:0001384	CCN201912131	Human	RNAseq
Inh L1-3 VIP HSPB6	RNAseq 021	CS201912131_21			Nikolas Jorstad	10.1101/2020.03.31.016972	primary motor cortex	UBERON:0001384	CCN201912131	Human	RNAseq
Inh L1-2 VIP PTGER3	RNAseq 022	CS201912131_22			Nikolas Jorstad	10.1101/2020.03.31.016972	primary motor cortex	UBERON:0001384	CCN201912131	Human	RNAseq
Inh L1-2 VIP SCML4	RNAseq 023	CS201912131_23			Nikolas Jorstad	10.1101/2020.03.31.016972	primary motor cortex	UBERON:0001384	CCN201912131	Human	RNAseq
Inh L1-3 VIP FNDC1	RNAseq 024	CS201912131_24			Nikolas Jorstad	10.1101/2020.03.31.016972	primary motor cortex	UBERON:0001384	CCN201912131	Human	RNAseq
Inh L1-3 VIP CHRNA2	RNAseq 025	CS201912131_25			Nikolas Jorstad	10.1101/2020.03.31.016972	primary motor cortex	UBERON:0001384	CCN201912131	Human	RNAseq
Inh L2 VIP SLC6A16	RNAseq 026	CS201912131_26			Nikolas Jorstad	10.1101/2020.03.31.016972	primary motor cortex	UBERON:0001384	CCN201912131	Human	RNAseq
Inh L1 VIP KLHDC8B	RNAseq 027	CS201912131_27			Nikolas Jorstad	10.1101/2020.03.31.016972	primary motor cortex	UBERON:0001384	CCN201912131	Human	RNAseq
Inh L3-5 VIP IGDCC3	RNAseq 028	CS201912131_28			Nikolas Jorstad	10.1101/2020.03.31.016972	primary motor cortex	UBERON:0001384	CCN201912131	Human	RNAseq
Inh L1-5 VIP SMOC1	RNAseq 029	CS201912131_29			Nikolas Jorstad	10.1101/2020.03.31.016972	primary motor cortex	UBERON:0001384	CCN201912131	Human	RNAseq
Inh L3-5 VIP HS3ST3A1	RNAseq 030	CS201912131_30			Nikolas Jorstad	10.1101/2020.03.31.016972	primary motor cortex	UBERON:0001384	CCN201912131	Human	RNAseq
Inh L5-6 VIP COL4A3	RNAseq 031	CS201912131_31			Nikolas Jorstad	10.1101/2020.03.31.016972	primary motor cortex	UBERON:0001384	CCN201912131	Human	RNAseq
Inh L1-5 VIP CD27-AS1	RNAseq 032	CS201912131_32			Nikolas Jorstad	10.1101/2020.03.31.016972	primary motor cortex	UBERON:0001384	CCN201912131	Human	RNAseq
Inh L2-5 VIP BSPRY	RNAseq 033	CS201912131_33			Nikolas Jorstad	10.1101/2020.03.31.016972	primary motor cortex	UBERON:0001384	CCN201912131	Human	RNAseq
Inh L2-5 VIP SOX11	RNAseq 034	CS201912131_34			Nikolas Jorstad	10.1101/2020.03.31.016972	primary motor cortex	UBERON:0001384	CCN201912131	Human	RNAseq
Inh L3-6 VIP ZIM2-AS1	RNAseq 035	CS201912131_35			Nikolas Jorstad	10.1101/2020.03.31.016972	primary motor cortex	UBERON:0001384	CCN201912131	Human	RNAseq
Inh L1-5 VIP PHLDB3	RNAseq 036	CS201912131_36			Nikolas Jorstad	10.1101/2020.03.31.016972	primary motor cortex	UBERON:0001384	CCN201912131	Human	RNAseq
Inh L1-5 VIP LINC01013	RNAseq 037	CS201912131_37			Nikolas Jorstad	10.1101/2020.03.31.016972	primary motor cortex	UBERON:0001384	CCN201912131	Human	RNAseq
Inh L3-6 VIP UG0898H09	RNAseq 038	CS201912131_38			Nikolas Jorstad	10.1101/2020.03.31.016972	primary motor cortex	UBERON:0001384	CCN201912131	Human	RNAseq
Inh L3-5 VIP TAC3	RNAseq 039	CS201912131_39			Nikolas Jorstad	10.1101/2020.03.31.016972	primary motor cortex	UBERON:0001384	CCN201912131	Human	RNAseq
Inh L1-6 SST NPY	RNAseq 040	CS201912131_40	Sst Chodl	Sst Chodl	Nikolas Jorstad	10.1101/2020.03.31.016972	primary motor cortex	UBERON:0001384	CCN201912131	Human	RNAseq
Inh L3-5 SST CDH3	RNAseq 041	CS201912131_41			Nikolas Jorstad	10.1101/2020.03.31.016972	primary motor cortex	UBERON:0001384	CCN201912131	Human	RNAseq
Inh L5 SST RPL35AP11	RNAseq 042	CS201912131_42			Nikolas Jorstad	10.1101/2020.03.31.016972	primary motor cortex	UBERON:0001384	CCN201912131	Human	RNAseq
Inh L5-6 SST ISX	RNAseq 043	CS201912131_43			Nikolas Jorstad	10.1101/2020.03.31.016972	primary motor cortex	UBERON:0001384	CCN201912131	Human	RNAseq
Inh L5-6 PVALB SST CRHR2	RNAseq 044	CS201912131_44			Nikolas Jorstad	10.1101/2020.03.31.016972	primary motor cortex	UBERON:0001384	CCN201912131	Human	RNAseq
Inh L3-5 SST OR5AH1P	RNAseq 045	CS201912131_45			Nikolas Jorstad	10.1101/2020.03.31.016972	primary motor cortex	UBERON:0001384	CCN201912131	Human	RNAseq
Inh L3-5 SST GGTLC3	RNAseq 046	CS201912131_46			Nikolas Jorstad	10.1101/2020.03.31.016972	primary motor cortex	UBERON:0001384	CCN201912131	Human	RNAseq
Inh L2-3 SST NMU	RNAseq 047	CS201912131_47			Nikolas Jorstad	10.1101/2020.03.31.016972	primary motor cortex	UBERON:0001384	CCN201912131	Human	RNAseq
Inh L5-6 SST PAWR	RNAseq 048	CS201912131_48			Nikolas Jorstad	10.1101/2020.03.31.016972	primary motor cortex	UBERON:0001384	CCN201912131	Human	RNAseq
Inh L5-6 SST PIK3CD	RNAseq 049	CS201912131_49			Nikolas Jorstad	10.1101/2020.03.31.016972	primary motor cortex	UBERON:0001384	CCN201912131	Human	RNAseq
Inh L1-2 SST CCNJL	RNAseq 050	CS201912131_50			Nikolas Jorstad	10.1101/2020.03.31.016972	primary motor cortex	UBERON:0001384	CCN201912131	Human	RNAseq
Inh L1-3 SST FAM20A	RNAseq 051	CS201912131_51			Nikolas Jorstad	10.1101/2020.03.31.016972	primary motor cortex	UBERON:0001384	CCN201912131	Human	RNAseq
Inh L1-2 SST PRRT4	RNAseq 052	CS201912131_52			Nikolas Jorstad	10.1101/2020.03.31.016972	primary motor cortex	UBERON:0001384	CCN201912131	Human	RNAseq
Inh L5-6 SST BEAN1	RNAseq 053	CS201912131_53			Nikolas Jorstad	10.1101/2020.03.31.016972	primary motor cortex	UBERON:0001384	CCN201912131	Human	RNAseq
Inh L5-6 SST DNAJC14	RNAseq 054	CS201912131_54			Nikolas Jorstad	10.1101/2020.03.31.016972	primary motor cortex	UBERON:0001384	CCN201912131	Human	RNAseq
Inh L5-6 SST C4orf26	RNAseq 055	CS201912131_55			Nikolas Jorstad	10.1101/2020.03.31.016972	primary motor cortex	UBERON:0001384	CCN201912131	Human	RNAseq
Inh L5-6 SST FBN2	RNAseq 056	CS201912131_56			Nikolas Jorstad	10.1101/2020.03.31.016972	primary motor cortex	UBERON:0001384	CCN201912131	Human	RNAseq
Inh L5-6 SST KLHL1	RNAseq 057	CS201912131_57			Nikolas Jorstad	10.1101/2020.03.31.016972	primary motor cortex	UBERON:0001384	CCN201912131	Human	RNAseq
Inh L6 SST TH	RNAseq 058	CS201912131_58		Sst_7	Nikolas Jorstad	10.1101/2020.03.31.016972	primary motor cortex	UBERON:0001384	CCN201912131	Human	RNAseq
Inh L5-6 PVALB KCNIP2	RNAseq 059	CS201912131_59			Nikolas Jorstad	10.1101/2020.03.31.016972	primary motor cortex	UBERON:0001384	CCN201912131	Human	RNAseq
Inh L5-6 PVALB ZFPM2-AS1	RNAseq 060	CS201912131_60			Nikolas Jorstad	10.1101/2020.03.31.016972	primary motor cortex	UBERON:0001384	CCN201912131	Human	RNAseq
Inh L3-5 PVALB ISG20	RNAseq 061	CS201912131_61			Nikolas Jorstad	10.1101/2020.03.31.016972	primary motor cortex	UBERON:0001384	CCN201912131	Human	RNAseq
Inh L5 PVALB LRIG3	RNAseq 062	CS201912131_62			Nikolas Jorstad	10.1101/2020.03.31.016972	primary motor cortex	UBERON:0001384	CCN201912131	Human	RNAseq
Inh L2-5 PVALB HHIPL1	RNAseq 063	CS201912131_63			Nikolas Jorstad	10.1101/2020.03.31.016972	primary motor cortex	UBERON:0001384	CCN201912131	Human	RNAseq
Inh L2-5 PVALB RPH3AL	RNAseq 064	CS201912131_64			Nikolas Jorstad	10.1101/2020.03.31.016972	primary motor cortex	UBERON:0001384	CCN201912131	Human	RNAseq
Inh L3 PVALB SAMD13	RNAseq 065	CS201912131_65			Nikolas Jorstad	10.1101/2020.03.31.016972	primary motor cortex	UBERON:0001384	CCN201912131	Human	RNAseq
Inh L1-2 PVALB CDK20	RNAseq 066	CS201912131_66			Nikolas Jorstad	10.1101/2020.03.31.016972	primary motor cortex	UBERON:0001384	CCN201912131	Human	RNAseq
Inh L2 PVALB FRZB	RNAseq 067	CS201912131_67			Nikolas Jorstad	10.1101/2020.03.31.016972	primary motor cortex	UBERON:0001384	CCN201912131	Human	RNAseq
Inh L1-2 SST CLIC6	RNAseq 068	CS201912131_68			Nikolas Jorstad	10.1101/2020.03.31.016972	primary motor cortex	UBERON:0001384	CCN201912131	Human	RNAseq
Inh L5-6 PVALB GAPDHP60	RNAseq 069	CS201912131_69			Nikolas Jorstad	10.1101/2020.03.31.016972	primary motor cortex	UBERON:0001384	CCN201912131	Human	RNAseq
Inh L5-6 PVALB FAM150B	RNAseq 070	CS201912131_70			Nikolas Jorstad	10.1101/2020.03.31.016972	primary motor cortex	UBERON:0001384	CCN201912131	Human	RNAseq
Inh L5-6 PVALB MEPE	RNAseq 071	CS201912131_71			Nikolas Jorstad	10.1101/2020.03.31.016972	primary motor cortex	UBERON:0001384	CCN201912131	Human	RNAseq
Inh L1-6 PVALB COL15A1	RNAseq 072	CS201912131_72	Chandelier	Chandelier	Nikolas Jorstad	10.1101/2020.03.31.016972	primary motor cortex	UBERON:0001384	CCN201912131	Human	RNAseq
Exc L2 LAMP5 KCNG3	RNAseq 073	CS201912131_73			Nikolas Jorstad	10.1101/2020.03.31.016972	primary motor cortex	UBERON:0001384	CCN201912131	Human	RNAseq
Exc L2 LINC00507 ATP7B	RNAseq 074	CS201912131_74			Nikolas Jorstad	10.1101/2020.03.31.016972	primary motor cortex	UBERON:0001384	CCN201912131	Human	RNAseq
Exc L2 LINC00507 GLRA3	RNAseq 075	CS201912131_75			Nikolas Jorstad	10.1101/2020.03.31.016972	primary motor cortex	UBERON:0001384	CCN201912131	Human	RNAseq
Exc L2-3 RORB RTKN2	RNAseq 076	CS201912131_76			Nikolas Jorstad	10.1101/2020.03.31.016972	primary motor cortex	UBERON:0001384	CCN201912131	Human	RNAseq
Exc L2-3 LINC00507 DSG3	RNAseq 077	CS201912131_77			Nikolas Jorstad	10.1101/2020.03.31.016972	primary motor cortex	UBERON:0001384	CCN201912131	Human	RNAseq
Exc L3 LAMP5 CARM1P1	RNAseq 078	CS201912131_78			Nikolas Jorstad	10.1101/2020.03.31.016972	primary motor cortex	UBERON:0001384	CCN201912131	Human	RNAseq
Oligo L2-6 OPALIN MAP6D1	RNAseq 117	CS201912131_79			Nikolas Jorstad	10.1101/2020.03.31.016972	primary motor cortex	UBERON:0001384	CCN201912131	Human	RNAseq
Exc L2-3 RORB CCDC68	RNAseq 079	CS201912131_80			Nikolas Jorstad	10.1101/2020.03.31.016972	primary motor cortex	UBERON:0001384	CCN201912131	Human	RNAseq
Exc L2-3 RORB PTPN3	RNAseq 080	CS201912131_81			Nikolas Jorstad	10.1101/2020.03.31.016972	primary motor cortex	UBERON:0001384	CCN201912131	Human	RNAseq
Exc L3 THEMIS ENPEP	RNAseq 081	CS201912131_82			Nikolas Jorstad	10.1101/2020.03.31.016972	primary motor cortex	UBERON:0001384	CCN201912131	Human	RNAseq
Exc L3-5 RORB TNNT2	RNAseq 082	CS201912131_83			Nikolas Jorstad	10.1101/2020.03.31.016972	primary motor cortex	UBERON:0001384	CCN201912131	Human	RNAseq
Exc L3-5 RORB LAMA4	RNAseq 083	CS201912131_84			Nikolas Jorstad	10.1101/2020.03.31.016972	primary motor cortex	UBERON:0001384	CCN201912131	Human	RNAseq
Exc L5 THEMIS VILL	RNAseq 084	CS201912131_85			Nikolas Jorstad	10.1101/2020.03.31.016972	primary motor cortex	UBERON:0001384	CCN201912131	Human	RNAseq
Exc L3 RORB OTOGL	RNAseq 085	CS201912131_86			Nikolas Jorstad	10.1101/2020.03.31.016972	primary motor cortex	UBERON:0001384	CCN201912131	Human	RNAseq
Exc L3-5 RORB LINC01202	RNAseq 086	CS201912131_87			Nikolas Jorstad	10.1101/2020.03.31.016972	primary motor cortex	UBERON:0001384	CCN201912131	Human	RNAseq
Exc L5 THEMIS SLC22A18	RNAseq 087	CS201912131_88			Nikolas Jorstad	10.1101/2020.03.31.016972	primary motor cortex	UBERON:0001384	CCN201912131	Human	RNAseq
Exc L5-6 THEMIS TNFAIP6	RNAseq 088	CS201912131_89			Nikolas Jorstad	10.1101/2020.03.31.016972	primary motor cortex	UBERON:0001384	CCN201912131	Human	RNAseq
Exc L3-5 RORB LNX2	RNAseq 089	CS201912131_90			Nikolas Jorstad	10.1101/2020.03.31.016972	primary motor cortex	UBERON:0001384	CCN201912131	Human	RNAseq
Exc L3-5 RORB RPRM	RNAseq 090	CS201912131_91			Nikolas Jorstad	10.1101/2020.03.31.016972	primary motor cortex	UBERON:0001384	CCN201912131	Human	RNAseq
Exc L5 RORB MED8	RNAseq 091	CS201912131_92			Nikolas Jorstad	10.1101/2020.03.31.016972	primary motor cortex	UBERON:0001384	CCN201912131	Human	RNAseq
Exc L5 THEMIS FGF10	RNAseq 092	CS201912131_93			Nikolas Jorstad	10.1101/2020.03.31.016972	primary motor cortex	UBERON:0001384	CCN201912131	Human	RNAseq
Exc L6 THEMIS LINC00343	RNAseq 093	CS201912131_94			Nikolas Jorstad	10.1101/2020.03.31.016972	primary motor cortex	UBERON:0001384	CCN201912131	Human	RNAseq
Exc L6 THEMIS SLN	RNAseq 094	CS201912131_95			Nikolas Jorstad	10.1101/2020.03.31.016972	primary motor cortex	UBERON:0001384	CCN201912131	Human	RNAseq
Exc L6 THEMIS SNTG2	RNAseq 095	CS201912131_96			Nikolas Jorstad	10.1101/2020.03.31.016972	primary motor cortex	UBERON:0001384	CCN201912131	Human	RNAseq
Exc L5-6 THEMIS SMYD1	RNAseq 096	CS201912131_97	L6 IT Car3	L6 IT_3	Nikolas Jorstad	10.1101/2020.03.31.016972	primary motor cortex	UBERON:0001384	CCN201912131	Human	RNAseq
Exc L5-6 FEZF2 OR1L8	RNAseq 097	CS201912131_98			Nikolas Jorstad	10.1101/2020.03.31.016972	primary motor cortex	UBERON:0001384	CCN201912131	Human	RNAseq
Exc L5 THEMIS LINC01116	RNAseq 098	CS201912131_99			Nikolas Jorstad	10.1101/2020.03.31.016972	primary motor cortex	UBERON:0001384	CCN201912131	Human	RNAseq
Exc L5 THEMIS RGPD6	RNAseq 099	CS201912131_100			Nikolas Jorstad	10.1101/2020.03.31.016972	primary motor cortex	UBERON:0001384	CCN201912131	Human	RNAseq
Exc L5-6 FEZF2 C9orf135-AS1	RNAseq 100	CS201912131_101		L6 CT_2	Nikolas Jorstad	10.1101/2020.03.31.016972	primary motor cortex	UBERON:0001384	CCN201912131	Human	RNAseq
Exc L5-6 FEZF2 FILIP1L	RNAseq 101	CS201912131_102			Nikolas Jorstad	10.1101/2020.03.31.016972	primary motor cortex	UBERON:0001384	CCN201912131	Human	RNAseq
Exc L5-6 FEZF2 SH2D1B	RNAseq 102	CS201912131_103			Nikolas Jorstad	10.1101/2020.03.31.016972	primary motor cortex	UBERON:0001384	CCN201912131	Human	RNAseq
Exc L6 FEZF2 PDYN	RNAseq 103	CS201912131_104			Nikolas Jorstad	10.1101/2020.03.31.016972	primary motor cortex	UBERON:0001384	CCN201912131	Human	RNAseq
Exc L6 FEZF2 FFAR4	RNAseq 104	CS201912131_105			Nikolas Jorstad	10.1101/2020.03.31.016972	primary motor cortex	UBERON:0001384	CCN201912131	Human	RNAseq
Exc L6 FEZF2 PROKR2	RNAseq 105	CS201912131_106			Nikolas Jorstad	10.1101/2020.03.31.016972	primary motor cortex	UBERON:0001384	CCN201912131	Human	RNAseq
Exc L5-6 FEZF2 CFTR	RNAseq 106	CS201912131_107			Nikolas Jorstad	10.1101/2020.03.31.016972	primary motor cortex	UBERON:0001384	CCN201912131	Human	RNAseq
Exc L6 FEZF2 KLK7	RNAseq 107	CS201912131_108			Nikolas Jorstad	10.1101/2020.03.31.016972	primary motor cortex	UBERON:0001384	CCN201912131	Human	RNAseq
Exc L6 FEZF2 POGK	RNAseq 108	CS201912131_109			Nikolas Jorstad	10.1101/2020.03.31.016972	primary motor cortex	UBERON:0001384	CCN201912131	Human	RNAseq
Exc L5 FEZF2 CSN1S1	RNAseq 109	CS201912131_110			Nikolas Jorstad	10.1101/2020.03.31.016972	primary motor cortex	UBERON:0001384	CCN201912131	Human	RNAseq
Exc L3-5 FEZF2 ASGR2	RNAseq 110	CS201912131_111			Nikolas Jorstad	10.1101/2020.03.31.016972	primary motor cortex	UBERON:0001384	CCN201912131	Human	RNAseq
Exc L3-5 FEZF2 LINC01107	RNAseq 111	CS201912131_112		L5 ET_2	Nikolas Jorstad	10.1101/2020.03.31.016972	primary motor cortex	UBERON:0001384	CCN201912131	Human	RNAseq
Exc L5 FEZF2 PKD2L1	RNAseq 112	CS201912131_113			Nikolas Jorstad	10.1101/2020.03.31.016972	primary motor cortex	UBERON:0001384	CCN201912131	Human	RNAseq
Exc L5 FEZF2 NREP-AS1	RNAseq 113	CS201912131_114			Nikolas Jorstad	10.1101/2020.03.31.016972	primary motor cortex	UBERON:0001384	CCN201912131	Human	RNAseq
Exc L5 FEZF2 RNF144A-AS1	RNAseq 114	CS201912131_115			Nikolas Jorstad	10.1101/2020.03.31.016972	primary motor cortex	UBERON:0001384	CCN201912131	Human	RNAseq
Exc L5-6 FEZF2 IFNG-AS1	RNAseq 115	CS201912131_116			Nikolas Jorstad	10.1101/2020.03.31.016972	primary motor cortex	UBERON:0001384	CCN201912131	Human	RNAseq
Exc L5-6 FEZF2 LPO	RNAseq 116	CS201912131_117			Nikolas Jorstad	10.1101/2020.03.31.016972	primary motor cortex	UBERON:0001384	CCN201912131	Human	RNAseq
OPC L1-6 PDGFRA COL20A1	RNAseq 118	CS201912131_118	OPC	OPC	Nikolas Jorstad	10.1101/2020.03.31.016972	primary motor cortex	UBERON:0001384	CCN201912131	Human	RNAseq
Oligo L3-6 OPALIN ENPP6	RNAseq 119	CS201912131_119		Oligo_1	Nikolas Jorstad	10.1101/2020.03.31.016972	primary motor cortex	UBERON:0001384	CCN201912131	Human	RNAseq
Oligo L2-6 OPALIN FTH1P3	RNAseq 120	CS201912131_120			Nikolas Jorstad	10.1101/2020.03.31.016972	primary motor cortex	UBERON:0001384	CCN201912131	Human	RNAseq
Oligo L5-6 OPALIN LDLRAP1	RNAseq 121	CS201912131_121			Nikolas Jorstad	10.1101/2020.03.31.016972	primary motor cortex	UBERON:0001384	CCN201912131	Human	RNAseq
Astro L1-6 FGFR3 AQP1	RNAseq 122	CS201912131_122			Nikolas Jorstad	10.1101/2020.03.31.016972	primary motor cortex	UBERON:0001384	CCN201912131	Human	RNAseq
Astro L1 FGFR3 SERPINI2	RNAseq 123	CS201912131_123			Nikolas Jorstad	10.1101/2020.03.31.016972	primary motor cortex	UBERON:0001384	CCN201912131	Human	RNAseq
Astro L1-6 FGFR3 PLCG1	RNAseq 124	CS201912131_124		Astro_2	Nikolas Jorstad	10.1101/2020.03.31.016972	primary motor cortex	UBERON:0001384	CCN201912131	Human	RNAseq
Endo L2-5 NOSTRIN SRGN	RNAseq 125	CS201912131_125	Endothelial	Endo	Nikolas Jorstad	10.1101/2020.03.31.016972	primary motor cortex	UBERON:0001384	CCN201912131	Human	RNAseq
VLMC L1-5 PDGFRA COLEC12	RNAseq 126	CS201912131_126	VLMC	VLMC	Nikolas Jorstad	10.1101/2020.03.31.016972	primary motor cortex	UBERON:0001384	CCN201912131	Human	RNAseq
Micro L1-6 TYROBP CD74	RNAseq 127	CS201912131_127	Microglia-PVM	Microglia/PVM	Nikolas Jorstad	10.1101/2020.03.31.016972	primary motor cortex	UBERON:0001384	CCN201912131	Human	RNAseq
Lamp5	RNAseq 001-008, 014-015	CS201912131_128	Lamp5		Nikolas Jorstad	10.1101/2020.03.31.016972	primary motor cortex	UBERON:0001384	CCN201912131	Human	RNAseq
Sncg	RNAseq 009-013, 016-018	CS201912131_129	Sncg		Nikolas Jorstad	10.1101/2020.03.31.016972	primary motor cortex	UBERON:0001384	CCN201912131	Human	RNAseq
Vip	RNAseq 019-039	CS201912131_130	Vip		Nikolas Jorstad	10.1101/2020.03.31.016972	primary motor cortex	UBERON:0001384	CCN201912131	Human	RNAseq
Sst	RNAseq 041-058	CS201912131_131	Sst		Nikolas Jorstad	10.1101/2020.03.31.016972	primary motor cortex	UBERON:0001384	CCN201912131	Human	RNAseq
Pvalb	RNAseq 059-072	CS201912131_132	Pvalb		Nikolas Jorstad	10.1101/2020.03.31.016972	primary motor cortex	UBERON:0001384	CCN201912131	Human	RNAseq
L2/3 IT	RNAseq 073-081	CS201912131_133	L2/3 IT		Nikolas Jorstad	10.1101/2020.03.31.016972	primary motor cortex	UBERON:0001384	CCN201912131	Human	RNAseq
L5 IT	RNAseq 081-092	CS201912131_134	L5 IT		Nikolas Jorstad	10.1101/2020.03.31.016972	primary motor cortex	UBERON:0001384	CCN201912131	Human	RNAseq
L6 IT	RNAseq 093-095	CS201912131_135	L6 IT		Nikolas Jorstad	10.1101/2020.03.31.016972	primary motor cortex	UBERON:0001384	CCN201912131	Human	RNAseq
L6 CT	RNAseq 097-102	CS201912131_136	L6 CT		Nikolas Jorstad	10.1101/2020.03.31.016972	primary motor cortex	UBERON:0001384	CCN201912131	Human	RNAseq
L6b	RNAseq 103-108	CS201912131_137	L6b	L6b	Nikolas Jorstad	10.1101/2020.03.31.016972	primary motor cortex	UBERON:0001384	CCN201912131	Human	RNAseq
L5 ET	RNAseq 109-111	CS201912131_138	L5 ET		Nikolas Jorstad	10.1101/2020.03.31.016972	primary motor cortex	UBERON:0001384	CCN201912131	Human	RNAseq
L5/6 NP	RNAseq 112-116	CS201912131_139	L5/6 NP	L5/6 NP	Nikolas Jorstad	10.1101/2020.03.31.016972	primary motor cortex	UBERON:0001384	CCN201912131	Human	RNAseq
Oligo	RNAseq 117, 119-121	CS201912131_140	Oligodendrocyte		Nikolas Jorstad	10.1101/2020.03.31.016972	primary motor cortex	UBERON:0001384	CCN201912131	Human	RNAseq
OPC	RNAseq 118	CS201912131_141	OPC		Nikolas Jorstad	10.1101/2020.03.31.016972	primary motor cortex	UBERON:0001384	CCN201912131	Human	RNAseq
Astro	RNAseq 122-124	CS201912131_142	Astrocyte		Nikolas Jorstad	10.1101/2020.03.31.016972	primary motor cortex	UBERON:0001384	CCN201912131	Human	RNAseq
CGE/PoA	RNAseq 001-039	CS201912131_143	CGE/PoA		Nikolas Jorstad	10.1101/2020.03.31.016972	primary motor cortex	UBERON:0001384	CCN201912131	Human	RNAseq
MGE	RNAseq 040-072	CS201912131_144	MGE		Nikolas Jorstad	10.1101/2020.03.31.016972	primary motor cortex	UBERON:0001384	CCN201912131	Human	RNAseq
IT projecting	RNAseq 073-096	CS201912131_145	IT projecting		Nikolas Jorstad	10.1101/2020.03.31.016972	primary motor cortex	UBERON:0001384	CCN201912131	Human	RNAseq
Non-IT projecting	RNAseq 097-116	CS201912131_146	Non-IT projecting		Nikolas Jorstad	10.1101/2020.03.31.016972	primary motor cortex	UBERON:0001384	CCN201912131	Human	RNAseq
Oligo-OPC	RNAseq 116-120	CS201912131_147	Oligodendrocyte-OPC		Nikolas Jorstad	10.1101/2020.03.31.016972	primary motor cortex	UBERON:0001384	CCN201912131	Human	RNAseq
Other NN	RNAseq 125-126	CS201912131_148	Other NN		Nikolas Jorstad	10.1101/2020.03.31.016972	primary motor cortex	UBERON:0001384	CCN201912131	Human	RNAseq
GABAergic	RNAseq 001-072	CS201912131_149	GABAergic		Nikolas Jorstad	10.1101/2020.03.31.016972	primary motor cortex	UBERON:0001384	CCN201912131	Human	RNAseq
Glutamatergic	RNAseq 073-116	CS201912131_150	Glutamatergic		Nikolas Jorstad	10.1101/2020.03.31.016972	primary motor cortex	UBERON:0001384	CCN201912131	Human	RNAseq
Non-Neuronal	RNAseq 117-126	CS201912131_151	Non-Neuronal		Nikolas Jorstad	10.1101/2020.03.31.016972	primary motor cortex	UBERON:0001384	CCN201912131	Human	RNAseq
Lamp5_2	RNAseq 002-004	CS201912131_152		Lamp5_2	Nikolas Jorstad	10.1101/2020.03.31.016972	primary motor cortex	UBERON:0001384	CCN201912131	Human	RNAseq
Lamp5_3	RNAseq 005-006	CS201912131_153	Lamp5 Lhx6	Lamp5_3	Nikolas Jorstad	10.1101/2020.03.31.016972	primary motor cortex	UBERON:0001384	CCN201912131	Human	RNAseq
Lamp5_4	RNAseq 007-008	CS201912131_154		Lamp5_4	Nikolas Jorstad	10.1101/2020.03.31.016972	primary motor cortex	UBERON:0001384	CCN201912131	Human	RNAseq
Sncg_1	RNAseq 009-010	CS201912131_155		Sncg_1	Nikolas Jorstad	10.1101/2020.03.31.016972	primary motor cortex	UBERON:0001384	CCN201912131	Human	RNAseq
Sncg_3	RNAseq 012-013	CS201912131_156		Sncg_3	Nikolas Jorstad	10.1101/2020.03.31.016972	primary motor cortex	UBERON:0001384	CCN201912131	Human	RNAseq
Lamp5_5	RNAseq 014-015	CS201912131_157		Lamp5_5	Nikolas Jorstad	10.1101/2020.03.31.016972	primary motor cortex	UBERON:0001384	CCN201912131	Human	RNAseq
Sncg_4	RNAseq 016-018	CS201912131_158		Sncg_4	Nikolas Jorstad	10.1101/2020.03.31.016972	primary motor cortex	UBERON:0001384	CCN201912131	Human	RNAseq
Vip_1	RNAseq 019-021	CS201912131_159		Vip_1	Nikolas Jorstad	10.1101/2020.03.31.016972	primary motor cortex	UBERON:0001384	CCN201912131	Human	RNAseq
Vip_2	RNAseq 022-028, 039	CS201912131_160		Vip_2	Nikolas Jorstad	10.1101/2020.03.31.016972	primary motor cortex	UBERON:0001384	CCN201912131	Human	RNAseq
Vip_3	RNAseq 029-033	CS201912131_161		Vip_3	Nikolas Jorstad	10.1101/2020.03.31.016972	primary motor cortex	UBERON:0001384	CCN201912131	Human	RNAseq
Vip_4	RNAseq 034-038	CS201912131_162		Vip_4	Nikolas Jorstad	10.1101/2020.03.31.016972	primary motor cortex	UBERON:0001384	CCN201912131	Human	RNAseq
Sst_1	RNAseq 041-042	CS201912131_163		Sst_1	Nikolas Jorstad	10.1101/2020.03.31.016972	primary motor cortex	UBERON:0001384	CCN201912131	Human	RNAseq
Sst_2	RNAseq 043-045	CS201912131_164		Sst_2	Nikolas Jorstad	10.1101/2020.03.31.016972	primary motor cortex	UBERON:0001384	CCN201912131	Human	RNAseq
Sst_3	RNAseq 046-047, 050-052	CS201912131_165		Sst_3	Nikolas Jorstad	10.1101/2020.03.31.016972	primary motor cortex	UBERON:0001384	CCN201912131	Human	RNAseq
Sst_4	RNAseq 048-049	CS201912131_166		Sst_4	Nikolas Jorstad	10.1101/2020.03.31.016972	primary motor cortex	UBERON:0001384	CCN201912131	Human	RNAseq
Sst_5	RNAseq 053-054	CS201912131_167		Sst_5	Nikolas Jorstad	10.1101/2020.03.31.016972	primary motor cortex	UBERON:0001384	CCN201912131	Human	RNAseq
Sst_6	RNAseq 055-057	CS201912131_168		Sst_6	Nikolas Jorstad	10.1101/2020.03.31.016972	primary motor cortex	UBERON:0001384	CCN201912131	Human	RNAseq
Pvalb_1	RNAseq 059-068	CS201912131_169		Pvalb_1	Nikolas Jorstad	10.1101/2020.03.31.016972	primary motor cortex	UBERON:0001384	CCN201912131	Human	RNAseq
Pvalb_2	RNAseq 069-071	CS201912131_170		Pvalb_2	Nikolas Jorstad	10.1101/2020.03.31.016972	primary motor cortex	UBERON:0001384	CCN201912131	Human	RNAseq
L2/3 IT(i)	RNAseq 073-78	CS201912131_171		L2/3 IT(i)	Nikolas Jorstad	10.1101/2020.03.31.016972	primary motor cortex	UBERON:0001384	CCN201912131	Human	RNAseq
L5 IT_1	RNAseq 079-086	CS201912131_172		L5 IT_1	Nikolas Jorstad	10.1101/2020.03.31.016972	primary motor cortex	UBERON:0001384	CCN201912131	Human	RNAseq
L5 IT_2	RNAseq 087, 089-090	CS201912131_173		L5 IT_2	Nikolas Jorstad	10.1101/2020.03.31.016972	primary motor cortex	UBERON:0001384	CCN201912131	Human	RNAseq
L6 IT_2	RNAseq 088, 095	CS201912131_174		L6 IT_2	Nikolas Jorstad	10.1101/2020.03.31.016972	primary motor cortex	UBERON:0001384	CCN201912131	Human	RNAseq
L5 IT_3	RNAseq 091-092	CS201912131_175		L5 IT_3	Nikolas Jorstad	10.1101/2020.03.31.016972	primary motor cortex	UBERON:0001384	CCN201912131	Human	RNAseq
L6 IT_1	RNAseq 093-094	CS201912131_176		L6 IT_1	Nikolas Jorstad	10.1101/2020.03.31.016972	primary motor cortex	UBERON:0001384	CCN201912131	Human	RNAseq
L6 CT_1	RNAseq 097-099, 101-102	CS201912131_177		L6 CT_1	Nikolas Jorstad	10.1101/2020.03.31.016972	primary motor cortex	UBERON:0001384	CCN201912131	Human	RNAseq
L5 ET_1	RNAseq 109-110	CS201912131_178		L5 ET_1	Nikolas Jorstad	10.1101/2020.03.31.016972	primary motor cortex	UBERON:0001384	CCN201912131	Human	RNAseq
Oligo_2	RNAseq 120-121	CS201912131_179		Oligo_2	Nikolas Jorstad	10.1101/2020.03.31.016972	primary motor cortex	UBERON:0001384	CCN201912131	Human	RNAseq
Astro_1	RNAseq 122-123	CS201912131_180		Astro_1	Nikolas Jorstad	10.1101/2020.03.31.016972	primary motor cortex	UBERON:0001384	CCN201912131	Human	RNAseq
Inh L1 LAMP5 LOC101927870	DNAm 01	CS202002272_1		RNAseq 001, 114-115 in CCN201912131	Wei Tian	10.1101/2020.03.31.016972	primary motor cortex	UBERON:0001384	CCN202002272	Human	DNAm
Inh L1-6 LAMP5 CPLX3	DNAm 02	CS202002272_2		RNAseq 002-004 in CCN201912131	Wei Tian	10.1101/2020.03.31.016972	primary motor cortex	UBERON:0001384	CCN202002272	Human	DNAm
Inh L1-6 LAMP5 SFRP1	DNAm 03	CS202002272_3	Lamp5_3	RNAseq 005-006 in CCN201912131	Wei Tian	10.1101/2020.03.31.016972	primary motor cortex	UBERON:0001384	CCN202002272	Human	DNAm
Inh L1 GAD1 SP8	DNAm 04	CS202002272_4		RNAseq 007-013 in CCN201912131	Wei Tian	10.1101/2020.03.31.016972	primary motor cortex	UBERON:0001384	CCN202002272	Human	DNAm
Inh L1 GAD1 NDST4	DNAm 05	CS202002272_5	Sncg_4	RNAseq 016-018 in CCN201912131	Wei Tian	10.1101/2020.03.31.016972	primary motor cortex	UBERON:0001384	CCN202002272	Human	DNAm
Inh L1-3 VIP CCDC184	DNAm 06	CS202002272_6		RNAseq 019-021 in CCN201912131	Wei Tian	10.1101/2020.03.31.016972	primary motor cortex	UBERON:0001384	CCN202002272	Human	DNAm
Inh L1-3 VIP NPR3	DNAm 07	CS202002272_7		RNAseq 022-026 in CCN201912131	Wei Tian	10.1101/2020.03.31.016972	primary motor cortex	UBERON:0001384	CCN202002272	Human	DNAm
Inh L1-5 VIP NOX4	DNAm 08	CS202002272_8		RNAseq 027-028 in CCN201912131	Wei Tian	10.1101/2020.03.31.016972	primary motor cortex	UBERON:0001384	CCN202002272	Human	DNAm
Inh L1-6 VIP ABI3BP	DNAm 09	CS202002272_9	Vip_3	RNAseq 029-033 in CCN201912131	Wei Tian	10.1101/2020.03.31.016972	primary motor cortex	UBERON:0001384	CCN202002272	Human	DNAm
Inh L2-6 VIP PENK	DNAm 10	CS202002272_10		RNAseq 034-035 in CCN201912131	Wei Tian	10.1101/2020.03.31.016972	primary motor cortex	UBERON:0001384	CCN202002272	Human	DNAm
Inh L3-5 VIP LOC101929231	DNAm 11	CS202002272_11		RNAseq 036-039 in CCN201912131	Wei Tian	10.1101/2020.03.31.016972	primary motor cortex	UBERON:0001384	CCN202002272	Human	DNAm
Inh L1-5 SST AHR	DNAm 12	CS202002272_12		RNAseq 040, 046-047, 050-052, 068 in CCN201912131	Wei Tian	10.1101/2020.03.31.016972	primary motor cortex	UBERON:0001384	CCN202002272	Human	DNAm
Inh L5-6 SST DCN	DNAm 13	CS202002272_13		RNAseq 041-045 in CCN201912131	Wei Tian	10.1101/2020.03.31.016972	primary motor cortex	UBERON:0001384	CCN202002272	Human	DNAm
Inh L5-6 SST KIAA1644	DNAm 14	CS202002272_14		RNAseq 048-049, 053-058 in CCN201912131	Wei Tian	10.1101/2020.03.31.016972	primary motor cortex	UBERON:0001384	CCN202002272	Human	DNAm
Inh L2-6 PVALB SIAH3	DNAm 15	CS202002272_15		RNAseq 059-061, 063-067 in CCN201912131	Wei Tian	10.1101/2020.03.31.016972	primary motor cortex	UBERON:0001384	CCN202002272	Human	DNAm
Inh L5-6 PVALB WNT16	DNAm 16	CS202002272_16		RNAseq 062, 069-071 in CCN201912131	Wei Tian	10.1101/2020.03.31.016972	primary motor cortex	UBERON:0001384	CCN202002272	Human	DNAm
Inh L1-6 PVALB COL15A1	DNAm 17	CS202002272_17	Chandelier	RNAseq 072 in CCN201912131	Wei Tian	10.1101/2020.03.31.016972	primary motor cortex	UBERON:0001384	CCN202002272	Human	DNAm
Exc L1-3 LAMP5 LINC00507	DNAm 18	CS202002272_18	L2/3 IT	RNAseq 073-081 in CCN201912131	Wei Tian	10.1101/2020.03.31.016972	primary motor cortex	UBERON:0001384	CCN202002272	Human	DNAm
Exc L2-3 RORB LOC101927281	DNAm 19	CS202002272_19		RNAseq 079-080 in CCN201912131	Wei Tian	10.1101/2020.03.31.016972	primary motor cortex	UBERON:0001384	CCN202002272	Human	DNAm
Exc L3-5 RORB COL22A1	DNAm 20	CS202002272_20		RNAseq 082-086, 091 in CCN201912131	Wei Tian	10.1101/2020.03.31.016972	primary motor cortex	UBERON:0001384	CCN202002272	Human	DNAm
Exc L5-6 THEMIS SERPINF1	DNAm 21	CS202002272_21		RNAseq 084, 088, 092-095 in CCN201912131	Wei Tian	10.1101/2020.03.31.016972	primary motor cortex	UBERON:0001384	CCN202002272	Human	DNAm
Exc L3-5 RORB LOC105374972	DNAm 22	CS202002272_22		RNAseq 087, 089-090 in CCN201912131	Wei Tian	10.1101/2020.03.31.016972	primary motor cortex	UBERON:0001384	CCN202002272	Human	DNAm
Exc L5-6 THEMIS SMYD1	DNAm 23	CS202002272_23	L6 IT Car3	RNAseq 096 in CCN201912131	Wei Tian	10.1101/2020.03.31.016972	primary motor cortex	UBERON:0001384	CCN202002272	Human	DNAm
Exc L5-6 FEZF2 LOC105371833	DNAm 24	CS202002272_24	L6 CT	RNAseq 097-102 in CCN201912131	Wei Tian	10.1101/2020.03.31.016972	primary motor cortex	UBERON:0001384	CCN202002272	Human	DNAm
Exc L6 FEZF2 NPFFR2	DNAm 25	CS202002272_25	L6b	RNAseq 103-108 in CCN201912131	Wei Tian	10.1101/2020.03.31.016972	primary motor cortex	UBERON:0001384	CCN202002272	Human	DNAm
Exc L3-5 FEZF2 LOC101929352	DNAm 26	CS202002272_26	L5 ET	RNAseq 109-111 in CCN201912131	Wei Tian	10.1101/2020.03.31.016972	primary motor cortex	UBERON:0001384	CCN202002272	Human	DNAm
Exc L5-6 FEZF2 NPSR1-AS1	DNAm 27	CS202002272_27	L5/6 NP	RNAseq 112-116 in CCN201912131	Wei Tian	10.1101/2020.03.31.016972	primary motor cortex	UBERON:0001384	CCN202002272	Human	DNAm
Oligo-OPC L1-6 OPALIN PLP1	DNAm 28	CS202002272_28	Oligodendrocyte-OPC	RNAseq 117-121 in CCN201912131	Wei Tian	10.1101/2020.03.31.016972	primary motor cortex	UBERON:0001384	CCN202002272	Human	DNAm
Astro L1-6 FGFR3 RNF219-AS1	DNAm 29	CS202002272_29	Astrocyte	RNAseq 122-124 in CCN201912131	Wei Tian	10.1101/2020.03.31.016972	primary motor cortex	UBERON:0001384	CCN202002272	Human	DNAm
Glia L1-5 NOSTRIN MECOM	DNAm 30	CS202002272_30	Other NN	RNAseq 125-126 in CCN201912131	Wei Tian	10.1101/2020.03.31.016972	primary motor cortex	UBERON:0001384	CCN202002272	Human	DNAm
Micro L1-6 TYROBP CD74	DNAm 31	CS202002272_31	Microglia-PVM	RNAseq 127 in CCN201912131	Wei Tian	10.1101/2020.03.31.016972	primary motor cortex	UBERON:0001384	CCN202002272	Human	DNAm
Inh L1-6 LAMP5 KIRREL	ATACseq 01	CS202002273_1		RNAseq 001-006 in CCN201912131	Blue Lake	10.1101/2020.03.31.016972	primary motor cortex	UBERON:0001384	CCN202002273	Human	ATACseq
Inh L1 GAD1 SP8	ATACseq 02	CS202002273_2		RNAseq 007-013 in CCN201912131	Blue Lake	10.1101/2020.03.31.016972	primary motor cortex	UBERON:0001384	CCN202002273	Human	ATACseq
Inh L1 LAMP5 NDNF	ATACseq 03	CS202002273_3	Lamp5_5	RNAseq 014-015 in CCN201912131	Blue Lake	10.1101/2020.03.31.016972	primary motor cortex	UBERON:0001384	CCN202002273	Human	ATACseq
Inh L1 GAD1 NDST4	ATACseq 04	CS202002273_4	Sncg_4	RNAseq 016-018 in CCN201912131	Blue Lake	10.1101/2020.03.31.016972	primary motor cortex	UBERON:0001384	CCN202002273	Human	ATACseq
Inh L1-5 VIP KCNJ2	ATACseq 05	CS202002273_5		RNAseq 019-020, 039 in CCN201912131	Blue Lake	10.1101/2020.03.31.016972	primary motor cortex	UBERON:0001384	CCN202002273	Human	ATACseq
Inh L1-6 VIP IQGAP2	ATACseq 06	CS202002273_6		RNAseq 021, 027-038 in CCN201912131	Blue Lake	10.1101/2020.03.31.016972	primary motor cortex	UBERON:0001384	CCN202002273	Human	ATACseq
Inh L1-3 VIP NPR3	ATACseq 07	CS202002273_7		RNAseq 022-026 in CCN201912131	Blue Lake	10.1101/2020.03.31.016972	primary motor cortex	UBERON:0001384	CCN202002273	Human	ATACseq
Inh L1-6 SST NPY	ATACseq 08	CS202002273_8	Sst Chodl	RNAseq 040 in CCN201912131	Blue Lake	10.1101/2020.03.31.016972	primary motor cortex	UBERON:0001384	CCN202002273	Human	ATACseq
Inh L3-5 SST EDNRA	ATACseq 09	CS202002273_9		RNAseq 041-042, 044-046, 049 in CCN201912131	Blue Lake	10.1101/2020.03.31.016972	primary motor cortex	UBERON:0001384	CCN202002273	Human	ATACseq
Inh L5-6 SST LOC101929667	ATACseq 10	CS202002273_10		RNAseq 043, 048, 055-057 in CCN201912131	Blue Lake	10.1101/2020.03.31.016972	primary motor cortex	UBERON:0001384	CCN202002273	Human	ATACseq
Inh L1-3 SST LOC392232	ATACseq 11	CS202002273_11		RNAseq 047, 068 in CCN201912131	Blue Lake	10.1101/2020.03.31.016972	primary motor cortex	UBERON:0001384	CCN202002273	Human	ATACseq
Inh L1-3 SST LOC105379168	ATACseq 12	CS202002273_12		RNAseq 050-052 in CCN201912131	Blue Lake	10.1101/2020.03.31.016972	primary motor cortex	UBERON:0001384	CCN202002273	Human	ATACseq
Inh L5-6 SST EBPL	ATACseq 13	CS202002273_13		RNAseq 053-054, 058 in CCN201912131	Blue Lake	10.1101/2020.03.31.016972	primary motor cortex	UBERON:0001384	CCN202002273	Human	ATACseq
Inh L5-6 PVALB GULP1	ATACseq 14	CS202002273_14		RNAseq 059, 069-071 in CCN201912131	Blue Lake	10.1101/2020.03.31.016972	primary motor cortex	UBERON:0001384	CCN202002273	Human	ATACseq
Inh L5-6 PVALB LINC01057	ATACseq 15	CS202002273_15		RNAseq 060, 062 in CCN201912131	Blue Lake	10.1101/2020.03.31.016972	primary motor cortex	UBERON:0001384	CCN202002273	Human	ATACseq
Inh L3-5 PVALB ISG20	ATACseq 16	CS202002273_16		RNAseq 061 in CCN201912131	Blue Lake	10.1101/2020.03.31.016972	primary motor cortex	UBERON:0001384	CCN202002273	Human	ATACseq
Inh L2-5 PVALB LOC105376919	ATACseq 17	CS202002273_17		RNAseq 063-067 in CCN201912131	Blue Lake	10.1101/2020.03.31.016972	primary motor cortex	UBERON:0001384	CCN202002273	Human	ATACseq
Inh L1-6 PVALB COL15A1	ATACseq 18	CS202002273_18	Chandelier	RNAseq 072 in CCN201912131	Blue Lake	10.1101/2020.03.31.016972	primary motor cortex	UBERON:0001384	CCN202002273	Human	ATACseq
Exc L2 LAMP5 KCNG3	ATACseq 19	CS202002273_19		RNAseq 073 in CCN201912131	Blue Lake	10.1101/2020.03.31.016972	primary motor cortex	UBERON:0001384	CCN202002273	Human	ATACseq
Exc L2 LINC00507 ATP7B	ATACseq 20	CS202002273_20		RNAseq 074 in CCN201912131	Blue Lake	10.1101/2020.03.31.016972	primary motor cortex	UBERON:0001384	CCN202002273	Human	ATACseq
Exc L2 LINC00507 GLRA3	ATACseq 21	CS202002273_21		RNAseq 075 in CCN201912131	Blue Lake	10.1101/2020.03.31.016972	primary motor cortex	UBERON:0001384	CCN202002273	Human	ATACseq
Exc L2-3 RORB RTKN2	ATACseq 22	CS202002273_22		RNAseq 076 in CCN201912131	Blue Lake	10.1101/2020.03.31.016972	primary motor cortex	UBERON:0001384	CCN202002273	Human	ATACseq
Exc L2-3 LINC00507 DSG3	ATACseq 23	CS202002273_23		RNAseq 077 in CCN201912131	Blue Lake	10.1101/2020.03.31.016972	primary motor cortex	UBERON:0001384	CCN202002273	Human	ATACseq
Exc L3 LAMP5 MIR3976HG	ATACseq 24	CS202002273_24		RNAseq 078, 081 in CCN201912131	Blue Lake	10.1101/2020.03.31.016972	primary motor cortex	UBERON:0001384	CCN202002273	Human	ATACseq
Exc L2-3 RORB VIPR2	ATACseq 25	CS202002273_25		RNAseq 079-080, 083 in CCN201912131	Blue Lake	10.1101/2020.03.31.016972	primary motor cortex	UBERON:0001384	CCN202002273	Human	ATACseq
Exc L3-5 RORB COL22A1	ATACseq 26	CS202002273_26		RNAseq 082, 085-086, 091 in CCN201912131	Blue Lake	10.1101/2020.03.31.016972	primary motor cortex	UBERON:0001384	CCN202002273	Human	ATACseq
Exc L5-6 THEMIS TMEM18	ATACseq 27	CS202002273_27		RNAseq 084, 088, 092 in CCN201912131	Blue Lake	10.1101/2020.03.31.016972	primary motor cortex	UBERON:0001384	CCN202002273	Human	ATACseq
Exc L3-5 RORB LOC105374972	ATACseq 28	CS202002273_28		RNAseq 087, 089-090 in CCN201912131	Blue Lake	10.1101/2020.03.31.016972	primary motor cortex	UBERON:0001384	CCN202002273	Human	ATACseq
Exc L6 THEMIS LINC00343	ATACseq 29	CS202002273_29	L6 IT	RNAseq 093-095 in CCN201912131	Blue Lake	10.1101/2020.03.31.016972	primary motor cortex	UBERON:0001384	CCN202002273	Human	ATACseq
Exc L5-6 THEMIS SMYD1	ATACseq 30	CS202002273_30	L6 IT Car3	RNAseq 096 in CCN201912131	Blue Lake	10.1101/2020.03.31.016972	primary motor cortex	UBERON:0001384	CCN202002273	Human	ATACseq
Exc L5-6 FEZF2 LOC105376596	ATACseq 31	CS202002273_31	L6 CT	RNAseq 097-099, 101-102 in CCN201912131	Blue Lake	10.1101/2020.03.31.016972	primary motor cortex	UBERON:0001384	CCN202002273	Human	ATACseq
Exc L5-6 FEZF2 C9orf135-AS1	ATACseq 32	CS202002273_32	L6 CT_2	RNAseq 100 in CCN201912131	Blue Lake	10.1101/2020.03.31.016972	primary motor cortex	UBERON:0001384	CCN202002273	Human	ATACseq
Exc L6 FEZF2 NPFFR2	ATACseq 33	CS202002273_33	L6b	RNAseq 103-108 in CCN201912131	Blue Lake	10.1101/2020.03.31.016972	primary motor cortex	UBERON:0001384	CCN202002273	Human	ATACseq
Exc L3-5 FEZF2 LOC101929352	ATACseq 34	CS202002273_34	L5 ET	RNAseq 109-111 in CCN201912131	Blue Lake	10.1101/2020.03.31.016972	primary motor cortex	UBERON:0001384	CCN202002273	Human	ATACseq
Exc L5-6 FEZF2 NPSR1-AS1	ATACseq 35	CS202002273_35	L5/6 NP	RNAseq 112-116 in CCN201912131	Blue Lake	10.1101/2020.03.31.016972	primary motor cortex	UBERON:0001384	CCN202002273	Human	ATACseq
OPC L1-6 PDGFRA COL20A1	ATACseq 36	CS202002273_36	OPC	RNAseq 118 in CCN201912131	Blue Lake	10.1101/2020.03.31.016972	primary motor cortex	UBERON:0001384	CCN202002273	Human	ATACseq
Oligo L2-6 OPALIN LOC101927459	ATACseq 37	CS202002273_37		RNAseq 117, 120 in CCN201912131	Blue Lake	10.1101/2020.03.31.016972	primary motor cortex	UBERON:0001384	CCN202002273	Human	ATACseq
Oligo L3-6 SLC1A3 LOC100506725	ATACseq 38	CS202002273_38		RNAseq 119, 121 in CCN201912131	Blue Lake	10.1101/2020.03.31.016972	primary motor cortex	UBERON:0001384	CCN202002273	Human	ATACseq
Astro L1-6 FGFR3 AQP1	ATACseq 39	CS202002273_39		RNAseq 122, 124 in CCN201912131	Blue Lake	10.1101/2020.03.31.016972	primary motor cortex	UBERON:0001384	CCN202002273	Human	ATACseq
Astro L1 FGFR3 SERPINI2	ATACseq 40	CS202002273_40		RNAseq 123 in CCN201912131	Blue Lake	10.1101/2020.03.31.016972	primary motor cortex	UBERON:0001384	CCN202002273	Human	ATACseq
Glia L1-5 NOSTRIN MECOM	ATACseq 41	CS202002273_41	Other NN	RNAseq 125-126 in CCN201912131	Blue Lake	10.1101/2020.03.31.016972	primary motor cortex	UBERON:0001384	CCN202002273	Human	ATACseq
Micro L1-6 TYROBP CD74	ATACseq 42	CS202002273_42	Microglia-PVM	RNAseq 127 in CCN201912131	Blue Lake	10.1101/2020.03.31.016972	primary motor cortex	UBERON:0001384	CCN202002273	Human	ATACseq
Inh SST NPY	RNAseq 01	CS201912132_1	Sst Chodl		Fenna Krienen	10.1101/2020.03.31.016972	primary motor cortex	UBERON:0001384	CCN201912132	Marmoset	RNAseq
Inh LAMP5 COL5A2	RNAseq 02	CS201912132_2		Lamp5_5	Fenna Krienen	10.1101/2020.03.31.016972	primary motor cortex	UBERON:0001384	CCN201912132	Marmoset	RNAseq
Inh LAMP5 TOX2	RNAseq 03	CS201912132_3		Lamp5_1	Fenna Krienen	10.1101/2020.03.31.016972	primary motor cortex	UBERON:0001384	CCN201912132	Marmoset	RNAseq
Inh LAMP5 TRPC6	RNAseq 04	CS201912132_4	Lamp5 Lhx6	Lamp5_3	Fenna Krienen	10.1101/2020.03.31.016972	primary motor cortex	UBERON:0001384	CCN201912132	Marmoset	RNAseq
Inh LAMP5 WWP1	RNAseq 05	CS201912132_5			Fenna Krienen	10.1101/2020.03.31.016972	primary motor cortex	UBERON:0001384	CCN201912132	Marmoset	RNAseq
Inh LAMP5 LOC108591196	RNAseq 06	CS201912132_6			Fenna Krienen	10.1101/2020.03.31.016972	primary motor cortex	UBERON:0001384	CCN201912132	Marmoset	RNAseq
Inh PAX6 HMBOX1	RNAseq 07	CS201912132_7		Lamp5_4	Fenna Krienen	10.1101/2020.03.31.016972	primary motor cortex	UBERON:0001384	CCN201912132	Marmoset	RNAseq
Inh SNCG PLPPR1	RNAseq 08	CS201912132_8		Sncg_2	Fenna Krienen	10.1101/2020.03.31.016972	primary motor cortex	UBERON:0001384	CCN201912132	Marmoset	RNAseq
Inh PAX6 ANKRD6	RNAseq 09	CS201912132_9			Fenna Krienen	10.1101/2020.03.31.016972	primary motor cortex	UBERON:0001384	CCN201912132	Marmoset	RNAseq
Inh VIP CYP19A1	RNAseq 10	CS201912132_10			Fenna Krienen	10.1101/2020.03.31.016972	primary motor cortex	UBERON:0001384	CCN201912132	Marmoset	RNAseq
Inh SNCG CNTN4	RNAseq 11	CS201912132_11			Fenna Krienen	10.1101/2020.03.31.016972	primary motor cortex	UBERON:0001384	CCN201912132	Marmoset	RNAseq
Inh PAX6 CDH4	RNAseq 12	CS201912132_12			Fenna Krienen	10.1101/2020.03.31.016972	primary motor cortex	UBERON:0001384	CCN201912132	Marmoset	RNAseq
Inh GAD1 PCP4	RNAseq 13	CS201912132_13			Fenna Krienen	10.1101/2020.03.31.016972	primary motor cortex	UBERON:0001384	CCN201912132	Marmoset	RNAseq
Inh GAD1 LOC108589948	RNAseq 14	CS201912132_14			Fenna Krienen	10.1101/2020.03.31.016972	primary motor cortex	UBERON:0001384	CCN201912132	Marmoset	RNAseq
Inh VIP THSD7B	RNAseq 15	CS201912132_15			Fenna Krienen	10.1101/2020.03.31.016972	primary motor cortex	UBERON:0001384	CCN201912132	Marmoset	RNAseq
Inh VIP LOC100397259	RNAseq 16	CS201912132_16			Fenna Krienen	10.1101/2020.03.31.016972	primary motor cortex	UBERON:0001384	CCN201912132	Marmoset	RNAseq
Inh GAD1 NPSR1	RNAseq 17	CS201912132_17			Fenna Krienen	10.1101/2020.03.31.016972	primary motor cortex	UBERON:0001384	CCN201912132	Marmoset	RNAseq
Inh SNCG LOC108587895	RNAseq 18	CS201912132_18			Fenna Krienen	10.1101/2020.03.31.016972	primary motor cortex	UBERON:0001384	CCN201912132	Marmoset	RNAseq
Inh VIP LOC108589153	RNAseq 19	CS201912132_19			Fenna Krienen	10.1101/2020.03.31.016972	primary motor cortex	UBERON:0001384	CCN201912132	Marmoset	RNAseq
Inh VIP FIGN	RNAseq 20	CS201912132_20			Fenna Krienen	10.1101/2020.03.31.016972	primary motor cortex	UBERON:0001384	CCN201912132	Marmoset	RNAseq
Inh VIP GPR149	RNAseq 21	CS201912132_21			Fenna Krienen	10.1101/2020.03.31.016972	primary motor cortex	UBERON:0001384	CCN201912132	Marmoset	RNAseq
Inh VIP LOC108588071	RNAseq 22	CS201912132_22			Fenna Krienen	10.1101/2020.03.31.016972	primary motor cortex	UBERON:0001384	CCN201912132	Marmoset	RNAseq
Inh VIP VAT1L	RNAseq 23	CS201912132_23			Fenna Krienen	10.1101/2020.03.31.016972	primary motor cortex	UBERON:0001384	CCN201912132	Marmoset	RNAseq
Inh VIP CIT	RNAseq 24	CS201912132_24			Fenna Krienen	10.1101/2020.03.31.016972	primary motor cortex	UBERON:0001384	CCN201912132	Marmoset	RNAseq
Inh VIP LOC108588539	RNAseq 25	CS201912132_25			Fenna Krienen	10.1101/2020.03.31.016972	primary motor cortex	UBERON:0001384	CCN201912132	Marmoset	RNAseq
Inh PAX6 MEIS2	RNAseq 26	CS201912132_26	Meis2		Fenna Krienen	10.1101/2020.03.31.016972	primary motor cortex	UBERON:0001384	CCN201912132	Marmoset	RNAseq
Inh SST LOC108589054	RNAseq 27	CS201912132_27		Sst_5	Fenna Krienen	10.1101/2020.03.31.016972	primary motor cortex	UBERON:0001384	CCN201912132	Marmoset	RNAseq
Inh SST LOC108588801	RNAseq 28	CS201912132_28		Sst_6	Fenna Krienen	10.1101/2020.03.31.016972	primary motor cortex	UBERON:0001384	CCN201912132	Marmoset	RNAseq
Inh SST LOC103788138	RNAseq 29	CS201912132_29		Sst_7	Fenna Krienen	10.1101/2020.03.31.016972	primary motor cortex	UBERON:0001384	CCN201912132	Marmoset	RNAseq
Inh SST MPP5	RNAseq 30	CS201912132_30			Fenna Krienen	10.1101/2020.03.31.016972	primary motor cortex	UBERON:0001384	CCN201912132	Marmoset	RNAseq
Inh SST KIRREL3	RNAseq 31	CS201912132_31			Fenna Krienen	10.1101/2020.03.31.016972	primary motor cortex	UBERON:0001384	CCN201912132	Marmoset	RNAseq
Inh SST LOC103788660	RNAseq 32	CS201912132_32			Fenna Krienen	10.1101/2020.03.31.016972	primary motor cortex	UBERON:0001384	CCN201912132	Marmoset	RNAseq
Inh SST CBLN4	RNAseq 33	CS201912132_33			Fenna Krienen	10.1101/2020.03.31.016972	primary motor cortex	UBERON:0001384	CCN201912132	Marmoset	RNAseq
Inh SST ABI3BP	RNAseq 34	CS201912132_34			Fenna Krienen	10.1101/2020.03.31.016972	primary motor cortex	UBERON:0001384	CCN201912132	Marmoset	RNAseq
Inh SST TMEFF2	RNAseq 35	CS201912132_35			Fenna Krienen	10.1101/2020.03.31.016972	primary motor cortex	UBERON:0001384	CCN201912132	Marmoset	RNAseq
Inh SST P4HA1	RNAseq 36	CS201912132_36			Fenna Krienen	10.1101/2020.03.31.016972	primary motor cortex	UBERON:0001384	CCN201912132	Marmoset	RNAseq
Inh SST LTBP1	RNAseq 37	CS201912132_37		Sst_4	Fenna Krienen	10.1101/2020.03.31.016972	primary motor cortex	UBERON:0001384	CCN201912132	Marmoset	RNAseq
Inh SST AIM1	RNAseq 38	CS201912132_38		Sst_1	Fenna Krienen	10.1101/2020.03.31.016972	primary motor cortex	UBERON:0001384	CCN201912132	Marmoset	RNAseq
Inh SST VAPA	RNAseq 39	CS201912132_39		Sst_2	Fenna Krienen	10.1101/2020.03.31.016972	primary motor cortex	UBERON:0001384	CCN201912132	Marmoset	RNAseq
Inh SST PCSK5	RNAseq 40	CS201912132_40			Fenna Krienen	10.1101/2020.03.31.016972	primary motor cortex	UBERON:0001384	CCN201912132	Marmoset	RNAseq
Inh PVALB OTOGL	RNAseq 41	CS201912132_41			Fenna Krienen	10.1101/2020.03.31.016972	primary motor cortex	UBERON:0001384	CCN201912132	Marmoset	RNAseq
Inh PVALB LOC103790362	RNAseq 42	CS201912132_42			Fenna Krienen	10.1101/2020.03.31.016972	primary motor cortex	UBERON:0001384	CCN201912132	Marmoset	RNAseq
Inh PVALB OSBP2	RNAseq 43	CS201912132_43			Fenna Krienen	10.1101/2020.03.31.016972	primary motor cortex	UBERON:0001384	CCN201912132	Marmoset	RNAseq
Inh PVALB LOC103789439	RNAseq 44	CS201912132_44			Fenna Krienen	10.1101/2020.03.31.016972	primary motor cortex	UBERON:0001384	CCN201912132	Marmoset	RNAseq
Inh PVALB GSTK1	RNAseq 45	CS201912132_45			Fenna Krienen	10.1101/2020.03.31.016972	primary motor cortex	UBERON:0001384	CCN201912132	Marmoset	RNAseq
Inh PVALB C8H7orf62	RNAseq 46	CS201912132_46			Fenna Krienen	10.1101/2020.03.31.016972	primary motor cortex	UBERON:0001384	CCN201912132	Marmoset	RNAseq
Inh PVALB SST LRRC6	RNAseq 47	CS201912132_47			Fenna Krienen	10.1101/2020.03.31.016972	primary motor cortex	UBERON:0001384	CCN201912132	Marmoset	RNAseq
Inh PVALB ADAMTS3	RNAseq 48	CS201912132_48			Fenna Krienen	10.1101/2020.03.31.016972	primary motor cortex	UBERON:0001384	CCN201912132	Marmoset	RNAseq
Inh PVALB SST EYS	RNAseq 49	CS201912132_49			Fenna Krienen	10.1101/2020.03.31.016972	primary motor cortex	UBERON:0001384	CCN201912132	Marmoset	RNAseq
Inh PVALB PCDH19	RNAseq 50	CS201912132_50			Fenna Krienen	10.1101/2020.03.31.016972	primary motor cortex	UBERON:0001384	CCN201912132	Marmoset	RNAseq
Inh PVALB KLHL29	RNAseq 51	CS201912132_51		Pvalb_2	Fenna Krienen	10.1101/2020.03.31.016972	primary motor cortex	UBERON:0001384	CCN201912132	Marmoset	RNAseq
Inh PVALB FAM19A4	RNAseq 52	CS201912132_52	Chandelier	Chandelier	Fenna Krienen	10.1101/2020.03.31.016972	primary motor cortex	UBERON:0001384	CCN201912132	Marmoset	RNAseq
Exc THEMIS ANO3	RNAseq 53	CS201912132_53			Fenna Krienen	10.1101/2020.03.31.016972	primary motor cortex	UBERON:0001384	CCN201912132	Marmoset	RNAseq
Exc RORB LOC108588466	RNAseq 54	CS201912132_54			Fenna Krienen	10.1101/2020.03.31.016972	primary motor cortex	UBERON:0001384	CCN201912132	Marmoset	RNAseq
Exc RORB SERPINE2	RNAseq 55	CS201912132_55			Fenna Krienen	10.1101/2020.03.31.016972	primary motor cortex	UBERON:0001384	CCN201912132	Marmoset	RNAseq
Exc RORB NDST3	RNAseq 56	CS201912132_56			Fenna Krienen	10.1101/2020.03.31.016972	primary motor cortex	UBERON:0001384	CCN201912132	Marmoset	RNAseq
Exc RORB KNL1	RNAseq 57	CS201912132_57			Fenna Krienen	10.1101/2020.03.31.016972	primary motor cortex	UBERON:0001384	CCN201912132	Marmoset	RNAseq
Exc RORB CAV3	RNAseq 58	CS201912132_58			Fenna Krienen	10.1101/2020.03.31.016972	primary motor cortex	UBERON:0001384	CCN201912132	Marmoset	RNAseq
Exc THEMIS KCTD16	RNAseq 59	CS201912132_59		L6 IT_2	Fenna Krienen	10.1101/2020.03.31.016972	primary motor cortex	UBERON:0001384	CCN201912132	Marmoset	RNAseq
Exc THEMIS COBL	RNAseq 60	CS201912132_60		L6 IT_1	Fenna Krienen	10.1101/2020.03.31.016972	primary motor cortex	UBERON:0001384	CCN201912132	Marmoset	RNAseq
Exc RORB LOC108593203	RNAseq 61	CS201912132_61			Fenna Krienen	10.1101/2020.03.31.016972	primary motor cortex	UBERON:0001384	CCN201912132	Marmoset	RNAseq
Exc RORB ANKRD27	RNAseq 62	CS201912132_62			Fenna Krienen	10.1101/2020.03.31.016972	primary motor cortex	UBERON:0001384	CCN201912132	Marmoset	RNAseq
Exc RORB ACTA2	RNAseq 63	CS201912132_63			Fenna Krienen	10.1101/2020.03.31.016972	primary motor cortex	UBERON:0001384	CCN201912132	Marmoset	RNAseq
Exc RORB USH1C	RNAseq 64	CS201912132_64			Fenna Krienen	10.1101/2020.03.31.016972	primary motor cortex	UBERON:0001384	CCN201912132	Marmoset	RNAseq
Exc RORB SLC38A11	RNAseq 65	CS201912132_65		L5 IT_3	Fenna Krienen	10.1101/2020.03.31.016972	primary motor cortex	UBERON:0001384	CCN201912132	Marmoset	RNAseq
Exc RORB PPA2	RNAseq 66	CS201912132_66			Fenna Krienen	10.1101/2020.03.31.016972	primary motor cortex	UBERON:0001384	CCN201912132	Marmoset	RNAseq
Exc RORB CHGA	RNAseq 67	CS201912132_67			Fenna Krienen	10.1101/2020.03.31.016972	primary motor cortex	UBERON:0001384	CCN201912132	Marmoset	RNAseq
Exc RORB HACL1	RNAseq 68	CS201912132_68			Fenna Krienen	10.1101/2020.03.31.016972	primary motor cortex	UBERON:0001384	CCN201912132	Marmoset	RNAseq
Oligo SLC1A3 LOC103793418	RNAseq 77	CS201912132_69			Fenna Krienen	10.1101/2020.03.31.016972	primary motor cortex	UBERON:0001384	CCN201912132	Marmoset	RNAseq
Exc THEMIS ARL13B	RNAseq 69	CS201912132_70			Fenna Krienen	10.1101/2020.03.31.016972	primary motor cortex	UBERON:0001384	CCN201912132	Marmoset	RNAseq
Exc FEZF2 PIEZO2	RNAseq 70	CS201912132_71			Fenna Krienen	10.1101/2020.03.31.016972	primary motor cortex	UBERON:0001384	CCN201912132	Marmoset	RNAseq
Exc FEZF2 PDZRN4	RNAseq 71	CS201912132_72		L5 ET_2	Fenna Krienen	10.1101/2020.03.31.016972	primary motor cortex	UBERON:0001384	CCN201912132	Marmoset	RNAseq
Exc FEZF2 RGS4	RNAseq 72	CS201912132_73		L6 CT_1	Fenna Krienen	10.1101/2020.03.31.016972	primary motor cortex	UBERON:0001384	CCN201912132	Marmoset	RNAseq
Exc FEZF2 NRP1	RNAseq 73	CS201912132_74		L6 CT_2	Fenna Krienen	10.1101/2020.03.31.016972	primary motor cortex	UBERON:0001384	CCN201912132	Marmoset	RNAseq
Exc FEZF2 ARSJ	RNAseq 74	CS201912132_75	L6b	L6b	Fenna Krienen	10.1101/2020.03.31.016972	primary motor cortex	UBERON:0001384	CCN201912132	Marmoset	RNAseq
Exc THEMIS NTNG2	RNAseq 75	CS201912132_76	L6 IT Car3	L6 IT_3	Fenna Krienen	10.1101/2020.03.31.016972	primary motor cortex	UBERON:0001384	CCN201912132	Marmoset	RNAseq
Exc FEZF2 CRYM	RNAseq 76	CS201912132_77	L5/6 NP	L5/6 NP	Fenna Krienen	10.1101/2020.03.31.016972	primary motor cortex	UBERON:0001384	CCN201912132	Marmoset	RNAseq
OPC PDGFRA VCAN	RNAseq 78	CS201912132_78	OPC	OPC	Fenna Krienen	10.1101/2020.03.31.016972	primary motor cortex	UBERON:0001384	CCN201912132	Marmoset	RNAseq
Astro FGFR3 EPHB1	RNAseq 79	CS201912132_79			Fenna Krienen	10.1101/2020.03.31.016972	primary motor cortex	UBERON:0001384	CCN201912132	Marmoset	RNAseq
Astro FGFR3 NWD1	RNAseq 80	CS201912132_80			Fenna Krienen	10.1101/2020.03.31.016972	primary motor cortex	UBERON:0001384	CCN201912132	Marmoset	RNAseq
Astro FGFR3 RCN2	RNAseq 81	CS201912132_81			Fenna Krienen	10.1101/2020.03.31.016972	primary motor cortex	UBERON:0001384	CCN201912132	Marmoset	RNAseq
Astro FGFR3 GFAP	RNAseq 82	CS201912132_82		Astro_1	Fenna Krienen	10.1101/2020.03.31.016972	primary motor cortex	UBERON:0001384	CCN201912132	Marmoset	RNAseq
Oligo OPALIN LOC103790018	RNAseq 83	CS201912132_83		Oligo_2	Fenna Krienen	10.1101/2020.03.31.016972	primary motor cortex	UBERON:0001384	CCN201912132	Marmoset	RNAseq
Oligo OPALIN MOBP	RNAseq 84	CS201912132_84		Oligo_1	Fenna Krienen	10.1101/2020.03.31.016972	primary motor cortex	UBERON:0001384	CCN201912132	Marmoset	RNAseq
Endo NOSTRIN IL1R1	RNAseq 85	CS201912132_85			Fenna Krienen	10.1101/2020.03.31.016972	primary motor cortex	UBERON:0001384	CCN201912132	Marmoset	RNAseq
Endo NOSTRIN CXCL12	RNAseq 86	CS201912132_86			Fenna Krienen	10.1101/2020.03.31.016972	primary motor cortex	UBERON:0001384	CCN201912132	Marmoset	RNAseq
Glia SLC1A3 FBLN5	RNAseq 87	CS201912132_87			Fenna Krienen	10.1101/2020.03.31.016972	primary motor cortex	UBERON:0001384	CCN201912132	Marmoset	RNAseq
Peri SLC1A3 CHST3	RNAseq 88	CS201912132_88			Fenna Krienen	10.1101/2020.03.31.016972	primary motor cortex	UBERON:0001384	CCN201912132	Marmoset	RNAseq
Peri SLC1A3 EPSTI1	RNAseq 89	CS201912132_89			Fenna Krienen	10.1101/2020.03.31.016972	primary motor cortex	UBERON:0001384	CCN201912132	Marmoset	RNAseq
VLMC PDGFRA C7	RNAseq 90	CS201912132_90			Fenna Krienen	10.1101/2020.03.31.016972	primary motor cortex	UBERON:0001384	CCN201912132	Marmoset	RNAseq
VLMC SLC1A3 CEMIP	RNAseq 91	CS201912132_91			Fenna Krienen	10.1101/2020.03.31.016972	primary motor cortex	UBERON:0001384	CCN201912132	Marmoset	RNAseq
VLMC SLC1A3 SLC13A3	RNAseq 92	CS201912132_92			Fenna Krienen	10.1101/2020.03.31.016972	primary motor cortex	UBERON:0001384	CCN201912132	Marmoset	RNAseq
VLMC SLC1A3 SLC47A1	RNAseq 93	CS201912132_93			Fenna Krienen	10.1101/2020.03.31.016972	primary motor cortex	UBERON:0001384	CCN201912132	Marmoset	RNAseq
Micro TYROBP LOC103788313	RNAseq 94	CS201912132_94	Microglia-PVM		Fenna Krienen	10.1101/2020.03.31.016972	primary motor cortex	UBERON:0001384	CCN201912132	Marmoset	RNAseq
Lamp5	RNAseq 02-07	CS201912132_95	Lamp5		Fenna Krienen	10.1101/2020.03.31.016972	primary motor cortex	UBERON:0001384	CCN201912132	Marmoset	RNAseq
Sncg	RNAseq 08-14	CS201912132_96	Sncg		Fenna Krienen	10.1101/2020.03.31.016972	primary motor cortex	UBERON:0001384	CCN201912132	Marmoset	RNAseq
Vip	RNAseq 15-25	CS201912132_97	Vip		Fenna Krienen	10.1101/2020.03.31.016972	primary motor cortex	UBERON:0001384	CCN201912132	Marmoset	RNAseq
Sst	RNAseq 27-40, 47	CS201912132_98	Sst		Fenna Krienen	10.1101/2020.03.31.016972	primary motor cortex	UBERON:0001384	CCN201912132	Marmoset	RNAseq
Pvalb	RNAseq 41-46, 48-52	CS201912132_99	Pvalb		Fenna Krienen	10.1101/2020.03.31.016972	primary motor cortex	UBERON:0001384	CCN201912132	Marmoset	RNAseq
L2/3 IT	RNAseq 53-56	CS201912132_100	L2/3 IT	L2/3 IT	Fenna Krienen	10.1101/2020.03.31.016972	primary motor cortex	UBERON:0001384	CCN201912132	Marmoset	RNAseq
L5 IT	RNAseq 57-58, 61-68	CS201912132_101	L5 IT		Fenna Krienen	10.1101/2020.03.31.016972	primary motor cortex	UBERON:0001384	CCN201912132	Marmoset	RNAseq
L6 IT	RNAseq 59-60	CS201912132_102	L6 IT		Fenna Krienen	10.1101/2020.03.31.016972	primary motor cortex	UBERON:0001384	CCN201912132	Marmoset	RNAseq
L5 ET	RNAseq 69-71	CS201912132_103	L5 ET		Fenna Krienen	10.1101/2020.03.31.016972	primary motor cortex	UBERON:0001384	CCN201912132	Marmoset	RNAseq
L6 CT	RNAseq 72-73	CS201912132_104	L6 CT		Fenna Krienen	10.1101/2020.03.31.016972	primary motor cortex	UBERON:0001384	CCN201912132	Marmoset	RNAseq
Oligo	RNAseq 77, 83-84	CS201912132_105	Oligodendrocyte		Fenna Krienen	10.1101/2020.03.31.016972	primary motor cortex	UBERON:0001384	CCN201912132	Marmoset	RNAseq
Astro	RNAseq 79-82	CS201912132_106	Astrocyte		Fenna Krienen	10.1101/2020.03.31.016972	primary motor cortex	UBERON:0001384	CCN201912132	Marmoset	RNAseq
Endo	RNAseq 85-87	CS201912132_107	Endothelial	Endo	Fenna Krienen	10.1101/2020.03.31.016972	primary motor cortex	UBERON:0001384	CCN201912132	Marmoset	RNAseq
Peri	RNAseq 88-89	CS201912132_108	Peri		Fenna Krienen	10.1101/2020.03.31.016972	primary motor cortex	UBERON:0001384	CCN201912132	Marmoset	RNAseq
VLMC	RNAseq 90-93	CS201912132_109	VLMC		Fenna Krienen	10.1101/2020.03.31.016972	primary motor cortex	UBERON:0001384	CCN201912132	Marmoset	RNAseq
MGE	RNAseq 01, 27-52	CS201912132_110	MGE		Fenna Krienen	10.1101/2020.03.31.016972	primary motor cortex	UBERON:0001384	CCN201912132	Marmoset	RNAseq
CGE/PoA	RNAseq 02-26	CS201912132_111	CGE/PoA		Fenna Krienen	10.1101/2020.03.31.016972	primary motor cortex	UBERON:0001384	CCN201912132	Marmoset	RNAseq
IT projecting	RNAseq 53-68, 75	CS201912132_112	IT projecting		Fenna Krienen	10.1101/2020.03.31.016972	primary motor cortex	UBERON:0001384	CCN201912132	Marmoset	RNAseq
Non-IT projecting	RNAseq 69-76	CS201912132_113	Non-IT projecting		Fenna Krienen	10.1101/2020.03.31.016972	primary motor cortex	UBERON:0001384	CCN201912132	Marmoset	RNAseq
Oligo-OPC	RNAseq 77-78, 83-84	CS201912132_114	Oligodendrocyte-OPC		Fenna Krienen	10.1101/2020.03.31.016972	primary motor cortex	UBERON:0001384	CCN201912132	Marmoset	RNAseq
Other NN	RNAseq 85-93	CS201912132_115	Other NN		Fenna Krienen	10.1101/2020.03.31.016972	primary motor cortex	UBERON:0001384	CCN201912132	Marmoset	RNAseq
GABAergic	RNAseq 01-52	CS201912132_116	GABAergic		Fenna Krienen	10.1101/2020.03.31.016972	primary motor cortex	UBERON:0001384	CCN201912132	Marmoset	RNAseq
Glutamatergic	RNAseq 53-76	CS201912132_117	Glutamatergic		Fenna Krienen	10.1101/2020.03.31.016972	primary motor cortex	UBERON:0001384	CCN201912132	Marmoset	RNAseq
Non-Neuronal	RNAseq 77-94	CS201912132_118	Non-neuronal		Fenna Krienen	10.1101/2020.03.31.016972	primary motor cortex	UBERON:0001384	CCN201912132	Marmoset	RNAseq
Sst Chodl(i)	RNAseq 01, 30	CS201912132_119		Sst Chodl(i)	Nikolas Jorstad	10.1101/2020.03.31.016972	primary motor cortex	UBERON:0001384	CCN201912132	Marmoset	RNAseq
Lamp5_2	RNAseq 05-06	CS201912132_120		Lamp5_2	Nikolas Jorstad	10.1101/2020.03.31.016972	primary motor cortex	UBERON:0001384	CCN201912132	Marmoset	RNAseq
Sncg_1	RNAseq 09, 12	CS201912132_121		Sncg_1	Nikolas Jorstad	10.1101/2020.03.31.016972	primary motor cortex	UBERON:0001384	CCN201912132	Marmoset	RNAseq
Sncg_3	RNAseq 10-11	CS201912132_122		Sncg_3	Nikolas Jorstad	10.1101/2020.03.31.016972	primary motor cortex	UBERON:0001384	CCN201912132	Marmoset	RNAseq
Sncg_4	RNAseq 13-14	CS201912132_123		Sncg_4	Nikolas Jorstad	10.1101/2020.03.31.016972	primary motor cortex	UBERON:0001384	CCN201912132	Marmoset	RNAseq
Vip_4	RNAseq 15, 25	CS201912132_124		Vip_4	Nikolas Jorstad	10.1101/2020.03.31.016972	primary motor cortex	UBERON:0001384	CCN201912132	Marmoset	RNAseq
Vip_2	RNAseq 16-18, 24	CS201912132_125		Vip_2	Nikolas Jorstad	10.1101/2020.03.31.016972	primary motor cortex	UBERON:0001384	CCN201912132	Marmoset	RNAseq
Vip_1	RNAseq 19-20	CS201912132_126		Vip_1	Nikolas Jorstad	10.1101/2020.03.31.016972	primary motor cortex	UBERON:0001384	CCN201912132	Marmoset	RNAseq
Vip_3	RNAseq 21-23	CS201912132_127		Vip_3	Nikolas Jorstad	10.1101/2020.03.31.016972	primary motor cortex	UBERON:0001384	CCN201912132	Marmoset	RNAseq
Sst_3	RNAseq 31-36, 40, 47	CS201912132_128		Sst_3	Nikolas Jorstad	10.1101/2020.03.31.016972	primary motor cortex	UBERON:0001384	CCN201912132	Marmoset	RNAseq
Pvalb_1	RNAseq 41-46, 48-50	CS201912132_129		Pvalb_1	Nikolas Jorstad	10.1101/2020.03.31.016972	primary motor cortex	UBERON:0001384	CCN201912132	Marmoset	RNAseq
L5 IT_1	RNAseq 57-58, 61-64	CS201912132_130		L5 IT_1	Nikolas Jorstad	10.1101/2020.03.31.016972	primary motor cortex	UBERON:0001384	CCN201912132	Marmoset	RNAseq
L5 IT_2	RNAseq 66-68	CS201912132_131		L5 IT_2	Nikolas Jorstad	10.1101/2020.03.31.016972	primary motor cortex	UBERON:0001384	CCN201912132	Marmoset	RNAseq
L5 ET_1	RNAseq 69-70	CS201912132_132		L5 ET_1	Nikolas Jorstad	10.1101/2020.03.31.016972	primary motor cortex	UBERON:0001384	CCN201912132	Marmoset	RNAseq
Astro_2	RNAseq 79-81	CS201912132_133		Astro_2	Nikolas Jorstad	10.1101/2020.03.31.016972	primary motor cortex	UBERON:0001384	CCN201912132	Marmoset	RNAseq
VLMC(i)	RNAseq 90-92	CS201912132_134		VLMC(i)	Nikolas Jorstad	10.1101/2020.03.31.016972	primary motor cortex	UBERON:0001384	CCN201912132	Marmoset	RNAseq
Inh LAMP5 COL5A2	DNAm 01	CS202002274_1		RNAseq 02-03 in CCN201912132	Wei Tian	10.1101/2020.03.31.016972	primary motor cortex	UBERON:0001384	CCN202002274	Marmoset	DNAm
Inh LAMP5 CTTNBP2	DNAm 02	CS202002274_2		RNAseq 04 in CCN201912132	Wei Tian	10.1101/2020.03.31.016972	primary motor cortex	UBERON:0001384	CCN202002274	Marmoset	DNAm
Inh LAMP5 PBX3	DNAm 03	CS202002274_3		RNAseq 05-06 in CCN201912132	Wei Tian	10.1101/2020.03.31.016972	primary motor cortex	UBERON:0001384	CCN202002274	Marmoset	DNAm
Inh GAD1 ZC4H2	DNAm 04	CS202002274_4		RNAseq 07-12, 26 in CCN201912132	Wei Tian	10.1101/2020.03.31.016972	primary motor cortex	UBERON:0001384	CCN202002274	Marmoset	DNAm
Inh GAD1 THSD7B	DNAm 05	CS202002274_5		RNAseq 13-14 in CCN201912132	Wei Tian	10.1101/2020.03.31.016972	primary motor cortex	UBERON:0001384	CCN202002274	Marmoset	DNAm
Inh VIP ARHGAP18	DNAm 06	CS202002274_6		RNAseq 15, 24-25 in CCN201912132	Wei Tian	10.1101/2020.03.31.016972	primary motor cortex	UBERON:0001384	CCN202002274	Marmoset	DNAm
Inh VIP LOC100397259	DNAm 07	CS202002274_7		RNAseq 16-17 in CCN201912132	Wei Tian	10.1101/2020.03.31.016972	primary motor cortex	UBERON:0001384	CCN202002274	Marmoset	DNAm
Inh VIP FIGN	DNAm 08	CS202002274_8		RNAseq 18-20 in CCN201912132	Wei Tian	10.1101/2020.03.31.016972	primary motor cortex	UBERON:0001384	CCN202002274	Marmoset	DNAm
Inh VIP DACH2	DNAm 09	CS202002274_9		RNAseq 21-23 in CCN201912132	Wei Tian	10.1101/2020.03.31.016972	primary motor cortex	UBERON:0001384	CCN202002274	Marmoset	DNAm
Inh SST ABI3BP	DNAm 10	CS202002274_10		RNAseq 01, 30-36, 47 in CCN201912132	Wei Tian	10.1101/2020.03.31.016972	primary motor cortex	UBERON:0001384	CCN202002274	Marmoset	DNAm
Inh SST COL11A1	DNAm 11	CS202002274_11		RNAseq 27-29, 37, 40 in CCN201912132	Wei Tian	10.1101/2020.03.31.016972	primary motor cortex	UBERON:0001384	CCN202002274	Marmoset	DNAm
Inh SST AKAP2	DNAm 12	CS202002274_12		RNAseq 38-39 in CCN201912132	Wei Tian	10.1101/2020.03.31.016972	primary motor cortex	UBERON:0001384	CCN202002274	Marmoset	DNAm
Inh PVALB CDON	DNAm 13	CS202002274_13		RNAseq 41, 45-46, 51 in CCN201912132	Wei Tian	10.1101/2020.03.31.016972	primary motor cortex	UBERON:0001384	CCN202002274	Marmoset	DNAm
Inh PVALB IGF2BP2	DNAm 14	CS202002274_14		RNAseq 42-44 in CCN201912132	Wei Tian	10.1101/2020.03.31.016972	primary motor cortex	UBERON:0001384	CCN202002274	Marmoset	DNAm
Inh PVALB EYS	DNAm 15	CS202002274_15		RNAseq 48-50 in CCN201912132	Wei Tian	10.1101/2020.03.31.016972	primary motor cortex	UBERON:0001384	CCN202002274	Marmoset	DNAm
Inh PVALB FAM19A4	DNAm 16	CS202002274_16	Chandelier	RNAseq 52 in CCN201912132	Wei Tian	10.1101/2020.03.31.016972	primary motor cortex	UBERON:0001384	CCN202002274	Marmoset	DNAm
Exc THEMIS ACTN2	DNAm 17	CS202002274_17		RNAseq 53 in CCN201912132	Wei Tian	10.1101/2020.03.31.016972	primary motor cortex	UBERON:0001384	CCN202002274	Marmoset	DNAm
Exc RORB LOC108588466	DNAm 18	CS202002274_18	L2/3 IT	RNAseq 54-56 in CCN201912132	Wei Tian	10.1101/2020.03.31.016972	primary motor cortex	UBERON:0001384	CCN202002274	Marmoset	DNAm
Exc THEMIS HS3ST5	DNAm 19	CS202002274_19	L6 IT	RNAseq 57-60 in CCN201912132	Wei Tian	10.1101/2020.03.31.016972	primary motor cortex	UBERON:0001384	CCN202002274	Marmoset	DNAm
Exc RORB LOC108593203	DNAm 20	CS202002274_20		RNAseq 61, 63 in CCN201912132	Wei Tian	10.1101/2020.03.31.016972	primary motor cortex	UBERON:0001384	CCN202002274	Marmoset	DNAm
Exc RORB ANTXR2	DNAm 21	CS202002274_21		RNAseq 62, 64 in CCN201912132	Wei Tian	10.1101/2020.03.31.016972	primary motor cortex	UBERON:0001384	CCN202002274	Marmoset	DNAm
Exc RORB PAPSS2	DNAm 22	CS202002274_22		RNAseq 65 in CCN201912132	Wei Tian	10.1101/2020.03.31.016972	primary motor cortex	UBERON:0001384	CCN202002274	Marmoset	DNAm
Exc RORB TLL1	DNAm 23	CS202002274_23		RNAseq 66-67 in CCN201912132	Wei Tian	10.1101/2020.03.31.016972	primary motor cortex	UBERON:0001384	CCN202002274	Marmoset	DNAm
Exc RORB PCED1B	DNAm 24	CS202002274_24		RNAseq 68 in CCN201912132	Wei Tian	10.1101/2020.03.31.016972	primary motor cortex	UBERON:0001384	CCN202002274	Marmoset	DNAm
Exc FEZF2 PIEZO2	DNAm 25	CS202002274_25	L5 ET	RNAseq 69-71 in CCN201912132	Wei Tian	10.1101/2020.03.31.016972	primary motor cortex	UBERON:0001384	CCN202002274	Marmoset	DNAm
Exc FEZF2 BMP5	DNAm 26	CS202002274_26		RNAseq 72 in CCN201912132	Wei Tian	10.1101/2020.03.31.016972	primary motor cortex	UBERON:0001384	CCN202002274	Marmoset	DNAm
Exc FEZF2 NRP1	DNAm 27	CS202002274_27		RNAseq 73 in CCN201912132	Wei Tian	10.1101/2020.03.31.016972	primary motor cortex	UBERON:0001384	CCN202002274	Marmoset	DNAm
Exc FEZF2 ARSJ	DNAm 28	CS202002274_28	L6b	RNAseq 74 in CCN201912132	Wei Tian	10.1101/2020.03.31.016972	primary motor cortex	UBERON:0001384	CCN202002274	Marmoset	DNAm
Exc THEMIS CENPP	DNAm 29	CS202002274_29	L6 IT Car3	RNAseq 75 in CCN201912132	Wei Tian	10.1101/2020.03.31.016972	primary motor cortex	UBERON:0001384	CCN202002274	Marmoset	DNAm
Exc FEZF2 TSHZ2	DNAm 30	CS202002274_30	L5/6 NP	RNAseq 76 in CCN201912132	Wei Tian	10.1101/2020.03.31.016972	primary motor cortex	UBERON:0001384	CCN202002274	Marmoset	DNAm
Glia SLC1A3 LOC103788313	DNAm 31	CS202002274_31		Non-RNAseq 01, 18 in CCN201912132	Wei Tian	10.1101/2020.03.31.016972	primary motor cortex	UBERON:0001384	CCN202002274	Marmoset	DNAm
Glia OPALIN ST18	DNAm 32	CS202002274_32		Non-RNAseq 02, 07-08, 12-17 in CCN201912132	Wei Tian	10.1101/2020.03.31.016972	primary motor cortex	UBERON:0001384	CCN202002274	Marmoset	DNAm
Glia RORB SLC1A2	DNAm 33	CS202002274_33	Astrocyte | Endothelial	Non-RNAseq 03-11 in CCN201912132	Wei Tian	10.1101/2020.03.31.016972	primary motor cortex	UBERON:0001384	CCN202002274	Marmoset	DNAm
Inh LAMP5 KIT	ATACseq 01	CS202002275_1		RNAseq 02-06 in CCN201912132	Blue Lake	10.1101/2020.03.31.016972	primary motor cortex	UBERON:0001384	CCN202002275	Marmoset	ATACseq
Inh GAD1 THSD7B	ATACseq 02	CS202002275_2		RNAseq 07-15 in CCN201912132	Blue Lake	10.1101/2020.03.31.016972	primary motor cortex	UBERON:0001384	CCN202002275	Marmoset	ATACseq
Inh VIP LOC103791740	ATACseq 03	CS202002275_3		RNAseq 16-26 in CCN201912132	Blue Lake	10.1101/2020.03.31.016972	primary motor cortex	UBERON:0001384	CCN202002275	Marmoset	ATACseq
Inh SST ABI3BP	ATACseq 04	CS202002275_4		RNAseq 01, 27-40, 47 in CCN201912132	Blue Lake	10.1101/2020.03.31.016972	primary motor cortex	UBERON:0001384	CCN202002275	Marmoset	ATACseq
Inh PVALB MYO5B	ATACseq 05	CS202002275_5		RNAseq 41-46, 48-51 in CCN201912132	Blue Lake	10.1101/2020.03.31.016972	primary motor cortex	UBERON:0001384	CCN202002275	Marmoset	ATACseq
Inh PVALB FAM19A4	ATACseq 06	CS202002275_6	Chandelier	RNAseq 52 in CCN201912132	Blue Lake	10.1101/2020.03.31.016972	primary motor cortex	UBERON:0001384	CCN202002275	Marmoset	ATACseq
Exc RORB NDST3	ATACseq 07	CS202002275_7		RNAseq 53, 55-56 in CCN201912132	Blue Lake	10.1101/2020.03.31.016972	primary motor cortex	UBERON:0001384	CCN202002275	Marmoset	ATACseq
Exc RORB LOC108588466	ATACseq 08	CS202002275_8		RNAseq 54, 61 in CCN201912132	Blue Lake	10.1101/2020.03.31.016972	primary motor cortex	UBERON:0001384	CCN202002275	Marmoset	ATACseq
Exc THEMIS HS3ST5	ATACseq 09	CS202002275_9	L6 IT	RNAseq 58-60 in CCN201912132	Blue Lake	10.1101/2020.03.31.016972	primary motor cortex	UBERON:0001384	CCN202002275	Marmoset	ATACseq
Exc RORB ANKRD27	ATACseq 10	CS202002275_10		RNAseq 62 in CCN201912132	Blue Lake	10.1101/2020.03.31.016972	primary motor cortex	UBERON:0001384	CCN202002275	Marmoset	ATACseq
Exc RORB DCC	ATACseq 11	CS202002275_11		RNAseq 63, 65 in CCN201912132	Blue Lake	10.1101/2020.03.31.016972	primary motor cortex	UBERON:0001384	CCN202002275	Marmoset	ATACseq
Exc RORB USH1C	ATACseq 12	CS202002275_12		RNAseq 64 in CCN201912132	Blue Lake	10.1101/2020.03.31.016972	primary motor cortex	UBERON:0001384	CCN202002275	Marmoset	ATACseq
Exc RORB TLL1	ATACseq 13	CS202002275_13		RNAseq 66-67 in CCN201912132	Blue Lake	10.1101/2020.03.31.016972	primary motor cortex	UBERON:0001384	CCN202002275	Marmoset	ATACseq
Exc RORB HACL1	ATACseq 14	CS202002275_14		RNAseq 68 in CCN201912132	Blue Lake	10.1101/2020.03.31.016972	primary motor cortex	UBERON:0001384	CCN202002275	Marmoset	ATACseq
Exc FEZF2 PIEZO2	ATACseq 15	CS202002275_15	L5 ET	RNAseq 69-71 in CCN201912132	Blue Lake	10.1101/2020.03.31.016972	primary motor cortex	UBERON:0001384	CCN202002275	Marmoset	ATACseq
Exc FEZF2 NRP1	ATACseq 16	CS202002275_16	L6 CT	RNAseq 72-73 in CCN201912132	Blue Lake	10.1101/2020.03.31.016972	primary motor cortex	UBERON:0001384	CCN202002275	Marmoset	ATACseq
Exc FEZF2 ARSJ	ATACseq 17	CS202002275_17	L6b	RNAseq 74 in CCN201912132	Blue Lake	10.1101/2020.03.31.016972	primary motor cortex	UBERON:0001384	CCN202002275	Marmoset	ATACseq
Exc THEMIS NTNG2	ATACseq 18	CS202002275_18	L6 IT Car3	RNAseq 75 in CCN201912132	Blue Lake	10.1101/2020.03.31.016972	primary motor cortex	UBERON:0001384	CCN202002275	Marmoset	ATACseq
Exc FEZF2 CRYM	ATACseq 19	CS202002275_19	L5/6 NP	RNAseq 76 in CCN201912132	Blue Lake	10.1101/2020.03.31.016972	primary motor cortex	UBERON:0001384	CCN202002275	Marmoset	ATACseq
Oligo OPALIN ST18	ATACseq 20	CS202002275_20	Oligodendrocyte	Non-RNAseq 01, 07-08 in CCN201912132	Blue Lake	10.1101/2020.03.31.016972	primary motor cortex	UBERON:0001384	CCN202002275	Marmoset	ATACseq
OPC PDGFRA VCAN	ATACseq 21	CS202002275_21	OPC	Non-RNAseq 02 in CCN201912132	Blue Lake	10.1101/2020.03.31.016972	primary motor cortex	UBERON:0001384	CCN202002275	Marmoset	ATACseq
Astro RORB SLC1A2	ATACseq 22	CS202002275_22	Astrocyte	Non-RNAseq 03-06 in CCN201912132	Blue Lake	10.1101/2020.03.31.016972	primary motor cortex	UBERON:0001384	CCN202002275	Marmoset	ATACseq
Glia SLC1A3 FLT1	ATACseq 23	CS202002275_23	Other NN	Non-RNAseq 09-18 in CCN201912132	Blue Lake	10.1101/2020.03.31.016972	primary motor cortex	UBERON:0001384	CCN202002275	Marmoset	ATACseq
Lamp5 Pax6	RNAseq 001	CS202002013_1		Lamp5_4	Zizhen Yao	10.1101/2020.02.29.970558	primary motor cortex	UBERON:0001384	CCN202002013	Mouse	RNAseq
Lamp5 Egln3_1	RNAseq 002	CS202002013_2		Sncg_4|Alpha7 cell	Zizhen Yao	10.1101/2020.02.29.970558	primary motor cortex	UBERON:0001384	CCN202002013	Mouse	RNAseq
Lamp5 Egln3_2	RNAseq 003	CS202002013_3		Canopy cell	Zizhen Yao	10.1101/2020.02.29.970558	primary motor cortex	UBERON:0001384	CCN202002013	Mouse	RNAseq
Lamp5 Egln3_3	RNAseq 004	CS202002013_4			Zizhen Yao	10.1101/2020.02.29.970558	primary motor cortex	UBERON:0001384	CCN202002013	Mouse	RNAseq
Lamp5 Pdlim5_1	RNAseq 005	CS202002013_5		Lamp5_1	Zizhen Yao	10.1101/2020.02.29.970558	primary motor cortex	UBERON:0001384	CCN202002013	Mouse	RNAseq
Lamp5 Pdlim5_2	RNAseq 006	CS202002013_6			Zizhen Yao	10.1101/2020.02.29.970558	primary motor cortex	UBERON:0001384	CCN202002013	Mouse	RNAseq
Lamp5 Slc35d3	RNAseq 007	CS202002013_7			Zizhen Yao	10.1101/2020.02.29.970558	primary motor cortex	UBERON:0001384	CCN202002013	Mouse	RNAseq
Lamp5 Lhx6	RNAseq 008	CS202002013_8	Lamp5 Lhx6	Lamp5_3|L5/6 neurogliaform cell	Zizhen Yao	10.1101/2020.02.29.970558	primary motor cortex	UBERON:0001384	CCN202002013	Mouse	RNAseq
Sncg Col14a1	RNAseq 009	CS202002013_9			Zizhen Yao	10.1101/2020.02.29.970558	primary motor cortex	UBERON:0001384	CCN202002013	Mouse	RNAseq
Sncg Slc17a8	RNAseq 010	CS202002013_10			Zizhen Yao	10.1101/2020.02.29.970558	primary motor cortex	UBERON:0001384	CCN202002013	Mouse	RNAseq
Sncg Calb1_1	RNAseq 011	CS202002013_11			Zizhen Yao	10.1101/2020.02.29.970558	primary motor cortex	UBERON:0001384	CCN202002013	Mouse	RNAseq
Sncg Calb1_2	RNAseq 012	CS202002013_12			Zizhen Yao	10.1101/2020.02.29.970558	primary motor cortex	UBERON:0001384	CCN202002013	Mouse	RNAseq
Sncg Npy2r	RNAseq 013	CS202002013_13			Zizhen Yao	10.1101/2020.02.29.970558	primary motor cortex	UBERON:0001384	CCN202002013	Mouse	RNAseq
Vip Sncg	RNAseq 014	CS202002013_14		Small CCK basket cell	Zizhen Yao	10.1101/2020.02.29.970558	primary motor cortex	UBERON:0001384	CCN202002013	Mouse	RNAseq
Vip Serpinf1_1	RNAseq 015	CS202002013_15			Zizhen Yao	10.1101/2020.02.29.970558	primary motor cortex	UBERON:0001384	CCN202002013	Mouse	RNAseq
Vip Serpinf1_2	RNAseq 016	CS202002013_16			Zizhen Yao	10.1101/2020.02.29.970558	primary motor cortex	UBERON:0001384	CCN202002013	Mouse	RNAseq
Vip Serpinf1_3	RNAseq 017	CS202002013_17			Zizhen Yao	10.1101/2020.02.29.970558	primary motor cortex	UBERON:0001384	CCN202002013	Mouse	RNAseq
Vip Htr1f	RNAseq 018	CS202002013_18			Zizhen Yao	10.1101/2020.02.29.970558	primary motor cortex	UBERON:0001384	CCN202002013	Mouse	RNAseq
Vip Gpc3	RNAseq 019	CS202002013_19			Zizhen Yao	10.1101/2020.02.29.970558	primary motor cortex	UBERON:0001384	CCN202002013	Mouse	RNAseq
Vip C1ql1	RNAseq 020	CS202002013_20			Zizhen Yao	10.1101/2020.02.29.970558	primary motor cortex	UBERON:0001384	CCN202002013	Mouse	RNAseq
Vip Mybpc1_2	RNAseq 021	CS202002013_21			Zizhen Yao	10.1101/2020.02.29.970558	primary motor cortex	UBERON:0001384	CCN202002013	Mouse	RNAseq
Vip Mybpc1_1	RNAseq 022	CS202002013_22			Zizhen Yao	10.1101/2020.02.29.970558	primary motor cortex	UBERON:0001384	CCN202002013	Mouse	RNAseq
Vip Chat_1	RNAseq 023	CS202002013_23			Zizhen Yao	10.1101/2020.02.29.970558	primary motor cortex	UBERON:0001384	CCN202002013	Mouse	RNAseq
Vip Mybpc1_3	RNAseq 024	CS202002013_24			Zizhen Yao	10.1101/2020.02.29.970558	primary motor cortex	UBERON:0001384	CCN202002013	Mouse	RNAseq
Vip Chat_2	RNAseq 025	CS202002013_25			Zizhen Yao	10.1101/2020.02.29.970558	primary motor cortex	UBERON:0001384	CCN202002013	Mouse	RNAseq
Vip Igfbp6_1	RNAseq 026	CS202002013_26			Zizhen Yao	10.1101/2020.02.29.970558	primary motor cortex	UBERON:0001384	CCN202002013	Mouse	RNAseq
Vip Igfbp6_2	RNAseq 027	CS202002013_27			Zizhen Yao	10.1101/2020.02.29.970558	primary motor cortex	UBERON:0001384	CCN202002013	Mouse	RNAseq
Sst Chodl	RNAseq 028	CS202002013_28	Sst Chodl	Sst Chodl|Long-projecting SST cell	Zizhen Yao	10.1101/2020.02.29.970558	primary motor cortex	UBERON:0001384	CCN202002013	Mouse	RNAseq
Sst Penk	RNAseq 029	CS202002013_29			Zizhen Yao	10.1101/2020.02.29.970558	primary motor cortex	UBERON:0001384	CCN202002013	Mouse	RNAseq
Sst Myh8_1	RNAseq 030	CS202002013_30			Zizhen Yao	10.1101/2020.02.29.970558	primary motor cortex	UBERON:0001384	CCN202002013	Mouse	RNAseq
Sst Myh8_2	RNAseq 031	CS202002013_31			Zizhen Yao	10.1101/2020.02.29.970558	primary motor cortex	UBERON:0001384	CCN202002013	Mouse	RNAseq
Sst Myh8_3	RNAseq 032	CS202002013_32			Zizhen Yao	10.1101/2020.02.29.970558	primary motor cortex	UBERON:0001384	CCN202002013	Mouse	RNAseq
Sst Htr1a	RNAseq 033	CS202002013_33			Zizhen Yao	10.1101/2020.02.29.970558	primary motor cortex	UBERON:0001384	CCN202002013	Mouse	RNAseq
Sst Etv1	RNAseq 034	CS202002013_34			Zizhen Yao	10.1101/2020.02.29.970558	primary motor cortex	UBERON:0001384	CCN202002013	Mouse	RNAseq
Sst Pvalb Etv1	RNAseq 035	CS202002013_35			Zizhen Yao	10.1101/2020.02.29.970558	primary motor cortex	UBERON:0001384	CCN202002013	Mouse	RNAseq
Sst Crhr2_1	RNAseq 036	CS202002013_36			Zizhen Yao	10.1101/2020.02.29.970558	primary motor cortex	UBERON:0001384	CCN202002013	Mouse	RNAseq
Sst Crhr2_2	RNAseq 037	CS202002013_37		Sst_4	Zizhen Yao	10.1101/2020.02.29.970558	primary motor cortex	UBERON:0001384	CCN202002013	Mouse	RNAseq
Sst Hpse	RNAseq 038	CS202002013_38		L4 SST cell	Zizhen Yao	10.1101/2020.02.29.970558	primary motor cortex	UBERON:0001384	CCN202002013	Mouse	RNAseq
Sst Calb2	RNAseq 039	CS202002013_39			Zizhen Yao	10.1101/2020.02.29.970558	primary motor cortex	UBERON:0001384	CCN202002013	Mouse	RNAseq
Sst Pappa	RNAseq 040	CS202002013_40			Zizhen Yao	10.1101/2020.02.29.970558	primary motor cortex	UBERON:0001384	CCN202002013	Mouse	RNAseq
Sst Pvalb Calb2	RNAseq 041	CS202002013_41		L2/3 PV-like cell	Zizhen Yao	10.1101/2020.02.29.970558	primary motor cortex	UBERON:0001384	CCN202002013	Mouse	RNAseq
Sst C1ql3_1	RNAseq 042	CS202002013_42		Sst_5	Zizhen Yao	10.1101/2020.02.29.970558	primary motor cortex	UBERON:0001384	CCN202002013	Mouse	RNAseq
Sst C1ql3_2	RNAseq 043	CS202002013_43			Zizhen Yao	10.1101/2020.02.29.970558	primary motor cortex	UBERON:0001384	CCN202002013	Mouse	RNAseq
Sst Tac2	RNAseq 044	CS202002013_44			Zizhen Yao	10.1101/2020.02.29.970558	primary motor cortex	UBERON:0001384	CCN202002013	Mouse	RNAseq
Sst Th_1	RNAseq 045	CS202002013_45			Zizhen Yao	10.1101/2020.02.29.970558	primary motor cortex	UBERON:0001384	CCN202002013	Mouse	RNAseq
Sst Th_2	RNAseq 046	CS202002013_46			Zizhen Yao	10.1101/2020.02.29.970558	primary motor cortex	UBERON:0001384	CCN202002013	Mouse	RNAseq
Sst Th_3	RNAseq 047	CS202002013_47		Sst_7	Zizhen Yao	10.1101/2020.02.29.970558	primary motor cortex	UBERON:0001384	CCN202002013	Mouse	RNAseq
Pvalb Gabrg1	RNAseq 048	CS202002013_48		L6 FS cell w/ large sag	Zizhen Yao	10.1101/2020.02.29.970558	primary motor cortex	UBERON:0001384	CCN202002013	Mouse	RNAseq
Pvalb Egfem1	RNAseq 049	CS202002013_49			Zizhen Yao	10.1101/2020.02.29.970558	primary motor cortex	UBERON:0001384	CCN202002013	Mouse	RNAseq
Pvalb Gpr149	RNAseq 050	CS202002013_50			Zizhen Yao	10.1101/2020.02.29.970558	primary motor cortex	UBERON:0001384	CCN202002013	Mouse	RNAseq
Pvalb Kank4	RNAseq 051	CS202002013_51			Zizhen Yao	10.1101/2020.02.29.970558	primary motor cortex	UBERON:0001384	CCN202002013	Mouse	RNAseq
Pvalb Calb1_1	RNAseq 052	CS202002013_52			Zizhen Yao	10.1101/2020.02.29.970558	primary motor cortex	UBERON:0001384	CCN202002013	Mouse	RNAseq
Pvalb Calb1_2	RNAseq 053	CS202002013_53			Zizhen Yao	10.1101/2020.02.29.970558	primary motor cortex	UBERON:0001384	CCN202002013	Mouse	RNAseq
Pvalb Reln	RNAseq 054	CS202002013_54			Zizhen Yao	10.1101/2020.02.29.970558	primary motor cortex	UBERON:0001384	CCN202002013	Mouse	RNAseq
Pvalb Il1rapl2	RNAseq 055	CS202002013_55			Zizhen Yao	10.1101/2020.02.29.970558	primary motor cortex	UBERON:0001384	CCN202002013	Mouse	RNAseq
Pvalb Vipr2_1	RNAseq 056	CS202002013_56			Zizhen Yao	10.1101/2020.02.29.970558	primary motor cortex	UBERON:0001384	CCN202002013	Mouse	RNAseq
Pvalb Vipr2_2	RNAseq 057	CS202002013_57			Zizhen Yao	10.1101/2020.02.29.970558	primary motor cortex	UBERON:0001384	CCN202002013	Mouse	RNAseq
L2/3 IT_1	RNAseq 058	CS202002013_58			Zizhen Yao	10.1101/2020.02.29.970558	primary motor cortex	UBERON:0001384	CCN202002013	Mouse	RNAseq
L2/3 IT_2	RNAseq 059	CS202002013_59			Zizhen Yao	10.1101/2020.02.29.970558	primary motor cortex	UBERON:0001384	CCN202002013	Mouse	RNAseq
L2/3 IT_3	RNAseq 060	CS202002013_60			Zizhen Yao	10.1101/2020.02.29.970558	primary motor cortex	UBERON:0001384	CCN202002013	Mouse	RNAseq
L4/5 IT_1	RNAseq 061	CS202002013_61		L4 IT	Zizhen Yao	10.1101/2020.02.29.970558	primary motor cortex	UBERON:0001384	CCN202002013	Mouse	RNAseq
L4/5 IT_2	RNAseq 062	CS202002013_62		L4/5 IT	Zizhen Yao	10.1101/2020.02.29.970558	primary motor cortex	UBERON:0001384	CCN202002013	Mouse	RNAseq
L5 IT_1	RNAseq 063	CS202002013_63			Zizhen Yao	10.1101/2020.02.29.970558	primary motor cortex	UBERON:0001384	CCN202002013	Mouse	RNAseq
L5 IT_2	RNAseq 064	CS202002013_64			Zizhen Yao	10.1101/2020.02.29.970558	primary motor cortex	UBERON:0001384	CCN202002013	Mouse	RNAseq
L5 IT_3	RNAseq 065	CS202002013_65			Zizhen Yao	10.1101/2020.02.29.970558	primary motor cortex	UBERON:0001384	CCN202002013	Mouse	RNAseq
L5 IT_4	RNAseq 066	CS202002013_66			Zizhen Yao	10.1101/2020.02.29.970558	primary motor cortex	UBERON:0001384	CCN202002013	Mouse	RNAseq
L6 IT_1	RNAseq 067	CS202002013_67		L6 IT_1	Zizhen Yao	10.1101/2020.02.29.970558	primary motor cortex	UBERON:0001384	CCN202002013	Mouse	RNAseq
L6 IT_2	RNAseq 068	CS202002013_68			Zizhen Yao	10.1101/2020.02.29.970558	primary motor cortex	UBERON:0001384	CCN202002013	Mouse	RNAseq
L6 IT Car3	RNAseq 069	CS202002013_69	L6 IT Car3	L6 IT_3|Claustrum-like IT	Zizhen Yao	10.1101/2020.02.29.970558	primary motor cortex	UBERON:0001384	CCN202002013	Mouse	RNAseq
L5 PT_1	RNAseq 070	CS202002013_70			Zizhen Yao	10.1101/2020.02.29.970558	primary motor cortex	UBERON:0001384	CCN202002013	Mouse	RNAseq
L5 PT_2	RNAseq 071	CS202002013_71		L5 ET_2	Zizhen Yao	10.1101/2020.02.29.970558	primary motor cortex	UBERON:0001384	CCN202002013	Mouse	RNAseq
L5 PT_3	RNAseq 072	CS202002013_72			Zizhen Yao	10.1101/2020.02.29.970558	primary motor cortex	UBERON:0001384	CCN202002013	Mouse	RNAseq
L5 PT_4	RNAseq 073	CS202002013_73			Zizhen Yao	10.1101/2020.02.29.970558	primary motor cortex	UBERON:0001384	CCN202002013	Mouse	RNAseq
L5/6 NP CT	RNAseq 074	CS202002013_74		L5 IT_3	Zizhen Yao	10.1101/2020.02.29.970558	primary motor cortex	UBERON:0001384	CCN202002013	Mouse	RNAseq
L6 CT Gpr139	RNAseq 075	CS202002013_75			Zizhen Yao	10.1101/2020.02.29.970558	primary motor cortex	UBERON:0001384	CCN202002013	Mouse	RNAseq
L6 CT Cpa6	RNAseq 076	CS202002013_76		L6 CT_2	Zizhen Yao	10.1101/2020.02.29.970558	primary motor cortex	UBERON:0001384	CCN202002013	Mouse	RNAseq
L6 CT Grp	RNAseq 077	CS202002013_77			Zizhen Yao	10.1101/2020.02.29.970558	primary motor cortex	UBERON:0001384	CCN202002013	Mouse	RNAseq
L6 CT Pou3f2	RNAseq 078	CS202002013_78			Zizhen Yao	10.1101/2020.02.29.970558	primary motor cortex	UBERON:0001384	CCN202002013	Mouse	RNAseq
L6 CT Kit_1	RNAseq 079	CS202002013_79			Zizhen Yao	10.1101/2020.02.29.970558	primary motor cortex	UBERON:0001384	CCN202002013	Mouse	RNAseq
L6 CT Kit_2	RNAseq 080	CS202002013_80			Zizhen Yao	10.1101/2020.02.29.970558	primary motor cortex	UBERON:0001384	CCN202002013	Mouse	RNAseq
L6b Col6a1	RNAseq 081	CS202002013_81			Zizhen Yao	10.1101/2020.02.29.970558	primary motor cortex	UBERON:0001384	CCN202002013	Mouse	RNAseq
L6b Shisa6_1	RNAseq 082	CS202002013_82			Zizhen Yao	10.1101/2020.02.29.970558	primary motor cortex	UBERON:0001384	CCN202002013	Mouse	RNAseq
L6b Shisa6_2	RNAseq 083	CS202002013_83			Zizhen Yao	10.1101/2020.02.29.970558	primary motor cortex	UBERON:0001384	CCN202002013	Mouse	RNAseq
L6b Ror1	RNAseq 084	CS202002013_84			Zizhen Yao	10.1101/2020.02.29.970558	primary motor cortex	UBERON:0001384	CCN202002013	Mouse	RNAseq
L6b Kcnip1	RNAseq 085	CS202002013_85			Zizhen Yao	10.1101/2020.02.29.970558	primary motor cortex	UBERON:0001384	CCN202002013	Mouse	RNAseq
L5/6 NP_1	RNAseq 086	CS202002013_86			Zizhen Yao	10.1101/2020.02.29.970558	primary motor cortex	UBERON:0001384	CCN202002013	Mouse	RNAseq
L5/6 NP_2	RNAseq 087	CS202002013_87			Zizhen Yao	10.1101/2020.02.29.970558	primary motor cortex	UBERON:0001384	CCN202002013	Mouse	RNAseq
L5/6 NP_3	RNAseq 088	CS202002013_88			Zizhen Yao	10.1101/2020.02.29.970558	primary motor cortex	UBERON:0001384	CCN202002013	Mouse	RNAseq
Meis2	RNAseq 089	CS202002013_89			Zizhen Yao	10.1101/2020.02.29.970558	primary motor cortex	UBERON:0001384	CCN202002013	Mouse	RNAseq
Meis2_Top2a	RNAseq 090	CS202002013_90			Zizhen Yao	10.1101/2020.02.29.970558	primary motor cortex	UBERON:0001384	CCN202002013	Mouse	RNAseq
OPC Pdgfra	RNAseq 091	CS202002013_91	OPC	OPC	Zizhen Yao	10.1101/2020.02.29.970558	primary motor cortex	UBERON:0001384	CCN202002013	Mouse	RNAseq
Astro_Top2a	RNAseq 092	CS202002013_92			Zizhen Yao	10.1101/2020.02.29.970558	primary motor cortex	UBERON:0001384	CCN202002013	Mouse	RNAseq
Astro Aqp4_Gfap	RNAseq 093	CS202002013_93			Zizhen Yao	10.1101/2020.02.29.970558	primary motor cortex	UBERON:0001384	CCN202002013	Mouse	RNAseq
Astro Aqp4_Slc7a10	RNAseq 094	CS202002013_94			Zizhen Yao	10.1101/2020.02.29.970558	primary motor cortex	UBERON:0001384	CCN202002013	Mouse	RNAseq
Oligo Enpp6_1	RNAseq 095	CS202002013_95			Zizhen Yao	10.1101/2020.02.29.970558	primary motor cortex	UBERON:0001384	CCN202002013	Mouse	RNAseq
Oligo Enpp6_2	RNAseq 096	CS202002013_96			Zizhen Yao	10.1101/2020.02.29.970558	primary motor cortex	UBERON:0001384	CCN202002013	Mouse	RNAseq
Oligo Enpp6_3	RNAseq 097	CS202002013_97			Zizhen Yao	10.1101/2020.02.29.970558	primary motor cortex	UBERON:0001384	CCN202002013	Mouse	RNAseq
Oligo Enpp6_4	RNAseq 098	CS202002013_98			Zizhen Yao	10.1101/2020.02.29.970558	primary motor cortex	UBERON:0001384	CCN202002013	Mouse	RNAseq
Oligo Opalin_1	RNAseq 099	CS202002013_99		Oligo_1	Zizhen Yao	10.1101/2020.02.29.970558	primary motor cortex	UBERON:0001384	CCN202002013	Mouse	RNAseq
Oligo Opalin_2	RNAseq 100	CS202002013_100			Zizhen Yao	10.1101/2020.02.29.970558	primary motor cortex	UBERON:0001384	CCN202002013	Mouse	RNAseq
Oligo Opalin_3	RNAseq 101	CS202002013_101			Zizhen Yao	10.1101/2020.02.29.970558	primary motor cortex	UBERON:0001384	CCN202002013	Mouse	RNAseq
Oligo Opalin_4	RNAseq 102	CS202002013_102			Zizhen Yao	10.1101/2020.02.29.970558	primary motor cortex	UBERON:0001384	CCN202002013	Mouse	RNAseq
Endo	RNAseq 103	CS202002013_103	Endothelial	Endo	Zizhen Yao	10.1101/2020.02.29.970558	primary motor cortex	UBERON:0001384	CCN202002013	Mouse	RNAseq
VLMC_1	RNAseq 104	CS202002013_104			Zizhen Yao	10.1101/2020.02.29.970558	primary motor cortex	UBERON:0001384	CCN202002013	Mouse	RNAseq
VLMC_2	RNAseq 105	CS202002013_105			Zizhen Yao	10.1101/2020.02.29.970558	primary motor cortex	UBERON:0001384	CCN202002013	Mouse	RNAseq
VLMC_3	RNAseq 106	CS202002013_106			Zizhen Yao	10.1101/2020.02.29.970558	primary motor cortex	UBERON:0001384	CCN202002013	Mouse	RNAseq
VLMC_4	RNAseq 107	CS202002013_107			Zizhen Yao	10.1101/2020.02.29.970558	primary motor cortex	UBERON:0001384	CCN202002013	Mouse	RNAseq
VLMC_5	RNAseq 108	CS202002013_108			Zizhen Yao	10.1101/2020.02.29.970558	primary motor cortex	UBERON:0001384	CCN202002013	Mouse	RNAseq
VLMC_6	RNAseq 109	CS202002013_109			Zizhen Yao	10.1101/2020.02.29.970558	primary motor cortex	UBERON:0001384	CCN202002013	Mouse	RNAseq
VLMC_7	RNAseq 110	CS202002013_110			Zizhen Yao	10.1101/2020.02.29.970558	primary motor cortex	UBERON:0001384	CCN202002013	Mouse	RNAseq
SMC	RNAseq 111	CS202002013_111	SMC		Zizhen Yao	10.1101/2020.02.29.970558	primary motor cortex	UBERON:0001384	CCN202002013	Mouse	RNAseq
Peri	RNAseq 112	CS202002013_112	Pericyte		Zizhen Yao	10.1101/2020.02.29.970558	primary motor cortex	UBERON:0001384	CCN202002013	Mouse	RNAseq
Micro	RNAseq 113	CS202002013_113	Microglia		Zizhen Yao	10.1101/2020.02.29.970558	primary motor cortex	UBERON:0001384	CCN202002013	Mouse	RNAseq
PVM_1	RNAseq 114	CS202002013_114			Zizhen Yao	10.1101/2020.02.29.970558	primary motor cortex	UBERON:0001384	CCN202002013	Mouse	RNAseq
PVM_2	RNAseq 115	CS202002013_115			Zizhen Yao	10.1101/2020.02.29.970558	primary motor cortex	UBERON:0001384	CCN202002013	Mouse	RNAseq
PVM_3	RNAseq 116	CS202002013_116			Zizhen Yao	10.1101/2020.02.29.970558	primary motor cortex	UBERON:0001384	CCN202002013	Mouse	RNAseq
	All cells	CS202002013_117			Zizhen Yao	10.1101/2020.02.29.970558	primary motor cortex	UBERON:0001384	CCN202002013	Mouse	RNAseq
	RNAseq 001-102	CS202002013_118			Zizhen Yao	10.1101/2020.02.29.970558	primary motor cortex	UBERON:0001384	CCN202002013	Mouse	RNAseq
	RNAseq 001-094	CS202002013_119			Zizhen Yao	10.1101/2020.02.29.970558	primary motor cortex	UBERON:0001384	CCN202002013	Mouse	RNAseq
	RNAseq 001-091	CS202002013_120			Zizhen Yao	10.1101/2020.02.29.970558	primary motor cortex	UBERON:0001384	CCN202002013	Mouse	RNAseq
	RNAseq 001-090	CS202002013_121			Zizhen Yao	10.1101/2020.02.29.970558	primary motor cortex	UBERON:0001384	CCN202002013	Mouse	RNAseq
	RNAseq 001-088	CS202002013_122			Zizhen Yao	10.1101/2020.02.29.970558	primary motor cortex	UBERON:0001384	CCN202002013	Mouse	RNAseq
GABAergic	RNAseq 001-057, 089-090	CS202002013_123	GABAergic		Zizhen Yao	10.1101/2020.02.29.970558	primary motor cortex	UBERON:0001384	CCN202002013	Mouse	RNAseq
CGE/PoA	RNAseq 001-027, 089-090	CS202002013_124	CGE/PoA		Zizhen Yao	10.1101/2020.02.29.970558	primary motor cortex	UBERON:0001384	CCN202002013	Mouse	RNAseq
Lamp5	RNAseq 001-008	CS202002013_125	Lamp5		Zizhen Yao	10.1101/2020.02.29.970558	primary motor cortex	UBERON:0001384	CCN202002013	Mouse	RNAseq
	RNAseq 001-004	CS202002013_126			Zizhen Yao	10.1101/2020.02.29.970558	primary motor cortex	UBERON:0001384	CCN202002013	Mouse	RNAseq
	RNAseq 002-004	CS202002013_127			Zizhen Yao	10.1101/2020.02.29.970558	primary motor cortex	UBERON:0001384	CCN202002013	Mouse	RNAseq
Lamp5_5	RNAseq 003-004	CS202002013_128		Lamp5_5	Zizhen Yao	10.1101/2020.02.29.970558	primary motor cortex	UBERON:0001384	CCN202002013	Mouse	RNAseq
	RNAseq 005-008	CS202002013_129			Zizhen Yao	10.1101/2020.02.29.970558	primary motor cortex	UBERON:0001384	CCN202002013	Mouse	RNAseq
	RNAseq 005-007	CS202002013_130		Neurogliaform cell	Zizhen Yao	10.1101/2020.02.29.970558	primary motor cortex	UBERON:0001384	CCN202002013	Mouse	RNAseq
	RNAseq 005-006	CS202002013_131			Zizhen Yao	10.1101/2020.02.29.970558	primary motor cortex	UBERON:0001384	CCN202002013	Mouse	RNAseq
	RNAseq 009-027	CS202002013_132			Zizhen Yao	10.1101/2020.02.29.970558	primary motor cortex	UBERON:0001384	CCN202002013	Mouse	RNAseq
Sncg	RNAseq 009-014	CS202002013_133	Sncg		Zizhen Yao	10.1101/2020.02.29.970558	primary motor cortex	UBERON:0001384	CCN202002013	Mouse	RNAseq
Sncg_2	RNAseq 009-010	CS202002013_134		Sncg_2	Zizhen Yao	10.1101/2020.02.29.970558	primary motor cortex	UBERON:0001384	CCN202002013	Mouse	RNAseq
	RNAseq 011-014	CS202002013_135			Zizhen Yao	10.1101/2020.02.29.970558	primary motor cortex	UBERON:0001384	CCN202002013	Mouse	RNAseq
	RNAseq 011-012	CS202002013_136			Zizhen Yao	10.1101/2020.02.29.970558	primary motor cortex	UBERON:0001384	CCN202002013	Mouse	RNAseq
	RNAseq 013-014	CS202002013_137			Zizhen Yao	10.1101/2020.02.29.970558	primary motor cortex	UBERON:0001384	CCN202002013	Mouse	RNAseq
Vip	RNAseq 015-027	CS202002013_138	Vip		Zizhen Yao	10.1101/2020.02.29.970558	primary motor cortex	UBERON:0001384	CCN202002013	Mouse	RNAseq
	RNAseq 015-017	CS202002013_139			Zizhen Yao	10.1101/2020.02.29.970558	primary motor cortex	UBERON:0001384	CCN202002013	Mouse	RNAseq
	RNAseq 015-016	CS202002013_140			Zizhen Yao	10.1101/2020.02.29.970558	primary motor cortex	UBERON:0001384	CCN202002013	Mouse	RNAseq
	RNAseq 018-027	CS202002013_141			Zizhen Yao	10.1101/2020.02.29.970558	primary motor cortex	UBERON:0001384	CCN202002013	Mouse	RNAseq
	RNAseq 018-025	CS202002013_142			Zizhen Yao	10.1101/2020.02.29.970558	primary motor cortex	UBERON:0001384	CCN202002013	Mouse	RNAseq
	RNAseq 018-020	CS202002013_143		L5 VIP cell	Zizhen Yao	10.1101/2020.02.29.970558	primary motor cortex	UBERON:0001384	CCN202002013	Mouse	RNAseq
	RNAseq 019-020	CS202002013_144			Zizhen Yao	10.1101/2020.02.29.970558	primary motor cortex	UBERON:0001384	CCN202002013	Mouse	RNAseq
	RNAseq 021-025	CS202002013_145			Zizhen Yao	10.1101/2020.02.29.970558	primary motor cortex	UBERON:0001384	CCN202002013	Mouse	RNAseq
	RNAseq 022-025	CS202002013_146			Zizhen Yao	10.1101/2020.02.29.970558	primary motor cortex	UBERON:0001384	CCN202002013	Mouse	RNAseq
	RNAseq 022-023	CS202002013_147			Zizhen Yao	10.1101/2020.02.29.970558	primary motor cortex	UBERON:0001384	CCN202002013	Mouse	RNAseq
	RNAseq 024-025	CS202002013_148			Zizhen Yao	10.1101/2020.02.29.970558	primary motor cortex	UBERON:0001384	CCN202002013	Mouse	RNAseq
Vip_4	RNAseq 026-027	CS202002013_149		Vip_4|??? VIP cell	Zizhen Yao	10.1101/2020.02.29.970558	primary motor cortex	UBERON:0001384	CCN202002013	Mouse	RNAseq
MGE	RNAseq 028-057	CS202002013_150	MGE		Zizhen Yao	10.1101/2020.02.29.970558	primary motor cortex	UBERON:0001384	CCN202002013	Mouse	RNAseq
	RNAseq 029-057	CS202002013_151			Zizhen Yao	10.1101/2020.02.29.970558	primary motor cortex	UBERON:0001384	CCN202002013	Mouse	RNAseq
	RNAseq 029-045	CS202002013_152			Zizhen Yao	10.1101/2020.02.29.970558	primary motor cortex	UBERON:0001384	CCN202002013	Mouse	RNAseq
	RNAseq 029-041	CS202002013_153			Zizhen Yao	10.1101/2020.02.29.970558	primary motor cortex	UBERON:0001384	CCN202002013	Mouse	RNAseq
	RNAseq 029-033	CS202002013_154			Zizhen Yao	10.1101/2020.02.29.970558	primary motor cortex	UBERON:0001384	CCN202002013	Mouse	RNAseq
	RNAseq 029-030	CS202002013_155			Zizhen Yao	10.1101/2020.02.29.970558	primary motor cortex	UBERON:0001384	CCN202002013	Mouse	RNAseq
Sst_1	RNAseq 031-033	CS202002013_156		Sst_1	Zizhen Yao	10.1101/2020.02.29.970558	primary motor cortex	UBERON:0001384	CCN202002013	Mouse	RNAseq
	RNAseq 031-032	CS202002013_157			Zizhen Yao	10.1101/2020.02.29.970558	primary motor cortex	UBERON:0001384	CCN202002013	Mouse	RNAseq
	RNAseq 034-041	CS202002013_158			Zizhen Yao	10.1101/2020.02.29.970558	primary motor cortex	UBERON:0001384	CCN202002013	Mouse	RNAseq
	RNAseq 034-035	CS202002013_159		L5 T Martinotti cell	Zizhen Yao	10.1101/2020.02.29.970558	primary motor cortex	UBERON:0001384	CCN202002013	Mouse	RNAseq
	RNAseq 036-041	CS202002013_160			Zizhen Yao	10.1101/2020.02.29.970558	primary motor cortex	UBERON:0001384	CCN202002013	Mouse	RNAseq
	RNAseq 036-037	CS202002013_161		L5 non-Martinotti cell	Zizhen Yao	10.1101/2020.02.29.970558	primary motor cortex	UBERON:0001384	CCN202002013	Mouse	RNAseq
	RNAseq 038-041	CS202002013_162			Zizhen Yao	10.1101/2020.02.29.970558	primary motor cortex	UBERON:0001384	CCN202002013	Mouse	RNAseq
	RNAseq 038-040	CS202002013_163			Zizhen Yao	10.1101/2020.02.29.970558	primary motor cortex	UBERON:0001384	CCN202002013	Mouse	RNAseq
	RNAseq 039-040	CS202002013_164		L2/3/5 fan Martinotti cell	Zizhen Yao	10.1101/2020.02.29.970558	primary motor cortex	UBERON:0001384	CCN202002013	Mouse	RNAseq
	RNAseq 042-045	CS202002013_165		L5/6 non-Martinotti cell	Zizhen Yao	10.1101/2020.02.29.970558	primary motor cortex	UBERON:0001384	CCN202002013	Mouse	RNAseq
	RNAseq 042-043	CS202002013_166			Zizhen Yao	10.1101/2020.02.29.970558	primary motor cortex	UBERON:0001384	CCN202002013	Mouse	RNAseq
	RNAseq 044-045	CS202002013_167			Zizhen Yao	10.1101/2020.02.29.970558	primary motor cortex	UBERON:0001384	CCN202002013	Mouse	RNAseq
	RNAseq 046-057	CS202002013_168			Zizhen Yao	10.1101/2020.02.29.970558	primary motor cortex	UBERON:0001384	CCN202002013	Mouse	RNAseq
	RNAseq 046-048	CS202002013_169			Zizhen Yao	10.1101/2020.02.29.970558	primary motor cortex	UBERON:0001384	CCN202002013	Mouse	RNAseq
	RNAseq 046-047	CS202002013_170		L6 Th+ SST/PV cell	Zizhen Yao	10.1101/2020.02.29.970558	primary motor cortex	UBERON:0001384	CCN202002013	Mouse	RNAseq
	RNAseq 049-057	CS202002013_171			Zizhen Yao	10.1101/2020.02.29.970558	primary motor cortex	UBERON:0001384	CCN202002013	Mouse	RNAseq
	RNAseq 049-055	CS202002013_172			Zizhen Yao	10.1101/2020.02.29.970558	primary motor cortex	UBERON:0001384	CCN202002013	Mouse	RNAseq
	RNAseq 050-055	CS202002013_173			Zizhen Yao	10.1101/2020.02.29.970558	primary motor cortex	UBERON:0001384	CCN202002013	Mouse	RNAseq
	RNAseq 051-055	CS202002013_174			Zizhen Yao	10.1101/2020.02.29.970558	primary motor cortex	UBERON:0001384	CCN202002013	Mouse	RNAseq
	RNAseq 051-053	CS202002013_175			Zizhen Yao	10.1101/2020.02.29.970558	primary motor cortex	UBERON:0001384	CCN202002013	Mouse	RNAseq
	RNAseq 052-053	CS202002013_176			Zizhen Yao	10.1101/2020.02.29.970558	primary motor cortex	UBERON:0001384	CCN202002013	Mouse	RNAseq
	RNAseq 054-055	CS202002013_177		Upper FS Basket cell	Zizhen Yao	10.1101/2020.02.29.970558	primary motor cortex	UBERON:0001384	CCN202002013	Mouse	RNAseq
Chandelier	RNAseq 056-057	CS202002013_178	Chandelier	Chandelier cell	Zizhen Yao	10.1101/2020.02.29.970558	primary motor cortex	UBERON:0001384	CCN202002013	Mouse	RNAseq
Glutamatergic	RNAseq 058-088	CS202002013_179	Glutamatergic		Zizhen Yao	10.1101/2020.02.29.970558	primary motor cortex	UBERON:0001384	CCN202002013	Mouse	RNAseq
	RNAseq 058-085	CS202002013_180			Zizhen Yao	10.1101/2020.02.29.970558	primary motor cortex	UBERON:0001384	CCN202002013	Mouse	RNAseq
	RNAseq 058-073	CS202002013_181			Zizhen Yao	10.1101/2020.02.29.970558	primary motor cortex	UBERON:0001384	CCN202002013	Mouse	RNAseq
IT projecting	RNAseq 058-069	CS202002013_182	IT projecting		Zizhen Yao	10.1101/2020.02.29.970558	primary motor cortex	UBERON:0001384	CCN202002013	Mouse	RNAseq
L2/3 IT	RNAseq 058-060	CS202002013_183	L2/3 IT	L2/3 IT	Zizhen Yao	10.1101/2020.02.29.970558	primary motor cortex	UBERON:0001384	CCN202002013	Mouse	RNAseq
	RNAseq 058-059	CS202002013_184			Zizhen Yao	10.1101/2020.02.29.970558	primary motor cortex	UBERON:0001384	CCN202002013	Mouse	RNAseq
	RNAseq 061-069	CS202002013_185			Zizhen Yao	10.1101/2020.02.29.970558	primary motor cortex	UBERON:0001384	CCN202002013	Mouse	RNAseq
	RNAseq 061-068	CS202002013_186			Zizhen Yao	10.1101/2020.02.29.970558	primary motor cortex	UBERON:0001384	CCN202002013	Mouse	RNAseq
	RNAseq 061-066	CS202002013_187			Zizhen Yao	10.1101/2020.02.29.970558	primary motor cortex	UBERON:0001384	CCN202002013	Mouse	RNAseq
L4	RNAseq 061-062	CS202002013_188	L4		Zizhen Yao	10.1101/2020.02.29.970558	primary motor cortex	UBERON:0001384	CCN202002013	Mouse	RNAseq
L5 IT	RNAseq 063-066	CS202002013_189	L5 IT		Zizhen Yao	10.1101/2020.02.29.970558	primary motor cortex	UBERON:0001384	CCN202002013	Mouse	RNAseq
L5 IT_2	RNAseq 063-064	CS202002013_190		L5 IT_2	Zizhen Yao	10.1101/2020.02.29.970558	primary motor cortex	UBERON:0001384	CCN202002013	Mouse	RNAseq
	RNAseq 065-066	CS202002013_191			Zizhen Yao	10.1101/2020.02.29.970558	primary motor cortex	UBERON:0001384	CCN202002013	Mouse	RNAseq
L6 IT	RNAseq 067-068	CS202002013_192	L6 IT		Zizhen Yao	10.1101/2020.02.29.970558	primary motor cortex	UBERON:0001384	CCN202002013	Mouse	RNAseq
L5 ET	RNAseq 070-073	CS202002013_193	L5 ET		Zizhen Yao	10.1101/2020.02.29.970558	primary motor cortex	UBERON:0001384	CCN202002013	Mouse	RNAseq
	RNAseq 071-073	CS202002013_194			Zizhen Yao	10.1101/2020.02.29.970558	primary motor cortex	UBERON:0001384	CCN202002013	Mouse	RNAseq
	RNAseq 071-072	CS202002013_195			Zizhen Yao	10.1101/2020.02.29.970558	primary motor cortex	UBERON:0001384	CCN202002013	Mouse	RNAseq
	RNAseq 074-085	CS202002013_196			Zizhen Yao	10.1101/2020.02.29.970558	primary motor cortex	UBERON:0001384	CCN202002013	Mouse	RNAseq
L6 CT	RNAseq 074-080	CS202002013_197	L6 CT	Corticothalamic|VAL/VM Projecting	Zizhen Yao	10.1101/2020.02.29.970558	primary motor cortex	UBERON:0001384	CCN202002013	Mouse	RNAseq
	RNAseq 075-080	CS202002013_198			Zizhen Yao	10.1101/2020.02.29.970558	primary motor cortex	UBERON:0001384	CCN202002013	Mouse	RNAseq
	RNAseq 075-078	CS202002013_199			Zizhen Yao	10.1101/2020.02.29.970558	primary motor cortex	UBERON:0001384	CCN202002013	Mouse	RNAseq
	RNAseq 076-078	CS202002013_200			Zizhen Yao	10.1101/2020.02.29.970558	primary motor cortex	UBERON:0001384	CCN202002013	Mouse	RNAseq
	RNAseq 077-078	CS202002013_201			Zizhen Yao	10.1101/2020.02.29.970558	primary motor cortex	UBERON:0001384	CCN202002013	Mouse	RNAseq
	RNAseq 079-080	CS202002013_202			Zizhen Yao	10.1101/2020.02.29.970558	primary motor cortex	UBERON:0001384	CCN202002013	Mouse	RNAseq
L6b	RNAseq 081-085	CS202002013_203	L6b	L6b|L6b subplate	Zizhen Yao	10.1101/2020.02.29.970558	primary motor cortex	UBERON:0001384	CCN202002013	Mouse	RNAseq
	RNAseq 081-084	CS202002013_204			Zizhen Yao	10.1101/2020.02.29.970558	primary motor cortex	UBERON:0001384	CCN202002013	Mouse	RNAseq
	RNAseq 082-084	CS202002013_205			Zizhen Yao	10.1101/2020.02.29.970558	primary motor cortex	UBERON:0001384	CCN202002013	Mouse	RNAseq
	RNAseq 082-083	CS202002013_206			Zizhen Yao	10.1101/2020.02.29.970558	primary motor cortex	UBERON:0001384	CCN202002013	Mouse	RNAseq
L5/6 NP	RNAseq 086-088	CS202002013_207	L5/6 NP	L5/6 NP| Near-projecting	Zizhen Yao	10.1101/2020.02.29.970558	primary motor cortex	UBERON:0001384	CCN202002013	Mouse	RNAseq
	RNAseq 086-087	CS202002013_208			Zizhen Yao	10.1101/2020.02.29.970558	primary motor cortex	UBERON:0001384	CCN202002013	Mouse	RNAseq
Meis2	RNAseq 089-090	CS202002013_209	Meis2		Zizhen Yao	10.1101/2020.02.29.970558	primary motor cortex	UBERON:0001384	CCN202002013	Mouse	RNAseq
Astro	RNAseq 092-094	CS202002013_210	Astrocyte		Zizhen Yao	10.1101/2020.02.29.970558	primary motor cortex	UBERON:0001384	CCN202002013	Mouse	RNAseq
Astro_1	RNAseq 093-094	CS202002013_211		Astro_1	Zizhen Yao	10.1101/2020.02.29.970558	primary motor cortex	UBERON:0001384	CCN202002013	Mouse	RNAseq
Oligo	RNAseq 095-102	CS202002013_212	Oligodendrocyte		Zizhen Yao	10.1101/2020.02.29.970558	primary motor cortex	UBERON:0001384	CCN202002013	Mouse	RNAseq
	RNAseq 095-098	CS202002013_213			Zizhen Yao	10.1101/2020.02.29.970558	primary motor cortex	UBERON:0001384	CCN202002013	Mouse	RNAseq
	RNAseq 095-096	CS202002013_214			Zizhen Yao	10.1101/2020.02.29.970558	primary motor cortex	UBERON:0001384	CCN202002013	Mouse	RNAseq
	RNAseq 097-098	CS202002013_215			Zizhen Yao	10.1101/2020.02.29.970558	primary motor cortex	UBERON:0001384	CCN202002013	Mouse	RNAseq
	RNAseq 099-102	CS202002013_216			Zizhen Yao	10.1101/2020.02.29.970558	primary motor cortex	UBERON:0001384	CCN202002013	Mouse	RNAseq
	RNAseq 099-100	CS202002013_217			Zizhen Yao	10.1101/2020.02.29.970558	primary motor cortex	UBERON:0001384	CCN202002013	Mouse	RNAseq
	RNAseq 101-102	CS202002013_218			Zizhen Yao	10.1101/2020.02.29.970558	primary motor cortex	UBERON:0001384	CCN202002013	Mouse	RNAseq
	RNAseq 103-116	CS202002013_219			Zizhen Yao	10.1101/2020.02.29.970558	primary motor cortex	UBERON:0001384	CCN202002013	Mouse	RNAseq
	RNAseq 103-112	CS202002013_220			Zizhen Yao	10.1101/2020.02.29.970558	primary motor cortex	UBERON:0001384	CCN202002013	Mouse	RNAseq
	RNAseq 104-112	CS202002013_221			Zizhen Yao	10.1101/2020.02.29.970558	primary motor cortex	UBERON:0001384	CCN202002013	Mouse	RNAseq
VLMC	RNAseq 104-110	CS202002013_222	VLMC		Zizhen Yao	10.1101/2020.02.29.970558	primary motor cortex	UBERON:0001384	CCN202002013	Mouse	RNAseq
	RNAseq 104-107	CS202002013_223			Zizhen Yao	10.1101/2020.02.29.970558	primary motor cortex	UBERON:0001384	CCN202002013	Mouse	RNAseq
	RNAseq 104-105	CS202002013_224			Zizhen Yao	10.1101/2020.02.29.970558	primary motor cortex	UBERON:0001384	CCN202002013	Mouse	RNAseq
	RNAseq 106-107	CS202002013_225			Zizhen Yao	10.1101/2020.02.29.970558	primary motor cortex	UBERON:0001384	CCN202002013	Mouse	RNAseq
	RNAseq 108-110	CS202002013_226			Zizhen Yao	10.1101/2020.02.29.970558	primary motor cortex	UBERON:0001384	CCN202002013	Mouse	RNAseq
	RNAseq 108-109	CS202002013_227			Zizhen Yao	10.1101/2020.02.29.970558	primary motor cortex	UBERON:0001384	CCN202002013	Mouse	RNAseq
	RNAseq 111-112	CS202002013_228			Zizhen Yao	10.1101/2020.02.29.970558	primary motor cortex	UBERON:0001384	CCN202002013	Mouse	RNAseq
Micro-PVM	RNAseq 113-116	CS202002013_229	Microglia-PVM	Microglia/PVM	Zizhen Yao	10.1101/2020.02.29.970558	primary motor cortex	UBERON:0001384	CCN202002013	Mouse	RNAseq
	RNAseq 113-115	CS202002013_230			Zizhen Yao	10.1101/2020.02.29.970558	primary motor cortex	UBERON:0001384	CCN202002013	Mouse	RNAseq
	RNAseq 114-115	CS202002013_231			Zizhen Yao	10.1101/2020.02.29.970558	primary motor cortex	UBERON:0001384	CCN202002013	Mouse	RNAseq
Sst	RNAseq 028-047	CS202002013_232	Sst		Zizhen Yao	10.1101/2020.02.29.970558	primary motor cortex	UBERON:0001384	CCN202002013	Mouse	RNAseq
Pvalb	RNAseq 048-057	CS202002013_233	Pvalb		Zizhen Yao	10.1101/2020.02.29.970558	primary motor cortex	UBERON:0001384	CCN202002013	Mouse	RNAseq
Non-IT projecting	RNAseq 070-088	CS202002013_234	Non-IT projecting		Zizhen Yao	10.1101/2020.02.29.970558	primary motor cortex	UBERON:0001384	CCN202002013	Mouse	RNAseq
Non-Neuronal	RNAseq 091-116	CS202002013_235	Non-Neuronal		Zizhen Yao	10.1101/2020.02.29.970558	primary motor cortex	UBERON:0001384	CCN202002013	Mouse	RNAseq
Oligo-OPC	RNAseq 091,095-102	CS202002013_236	Oligodendrocyte-OPC		Zizhen Yao	10.1101/2020.02.29.970558	primary motor cortex	UBERON:0001384	CCN202002013	Mouse	RNAseq
	RNAseq 114-116	CS202002013_237	PVM		Zizhen Yao	10.1101/2020.02.29.970558	primary motor cortex	UBERON:0001384	CCN202002013	Mouse	RNAseq
Other NN	RNAseq 103-112	CS202002013_238	Other NN		Zizhen Yao	10.1101/2020.02.29.970558	primary motor cortex	UBERON:0001384	CCN202002013	Mouse	RNAseq
Lamp5_2	RNAseq 006-007	CS202002013_239		Lamp5_2	Nikolas Jorstad	10.1101/2020.03.31.016972	primary motor cortex	UBERON:0001384	CCN202002013	Mouse	RNAseq
Sncg_3	RNAseq 011-013	CS202002013_240		Sncg_3	Nikolas Jorstad	10.1101/2020.03.31.016972	primary motor cortex	UBERON:0001384	CCN202002013	Mouse	RNAseq
Sncg_1	RNAseq 014, 016	CS202002013_241		Sncg_1	Nikolas Jorstad	10.1101/2020.03.31.016972	primary motor cortex	UBERON:0001384	CCN202002013	Mouse	RNAseq
Vip_3	RNAseq 015, 019, 022	CS202002013_242		Vip_3	Nikolas Jorstad	10.1101/2020.03.31.016972	primary motor cortex	UBERON:0001384	CCN202002013	Mouse	RNAseq
Vip_2	RNAseq 017-018, 020-021	CS202002013_243		Vip_2	Nikolas Jorstad	10.1101/2020.03.31.016972	primary motor cortex	UBERON:0001384	CCN202002013	Mouse	RNAseq
Vip_1	RNAseq 023-025	CS202002013_244		Vip_1	Nikolas Jorstad	10.1101/2020.03.31.016972	primary motor cortex	UBERON:0001384	CCN202002013	Mouse	RNAseq
Sst_2	RNAseq 029-030, 034	CS202002013_245		Sst_2	Nikolas Jorstad	10.1101/2020.03.31.016972	primary motor cortex	UBERON:0001384	CCN202002013	Mouse	RNAseq
Sst_3	RNAseq 035-036, 038-041	CS202002013_246		Sst_3	Nikolas Jorstad	10.1101/2020.03.31.016972	primary motor cortex	UBERON:0001384	CCN202002013	Mouse	RNAseq
Sst_6	RNAseq 043-045	CS202002013_247		Sst_6	Nikolas Jorstad	10.1101/2020.03.31.016972	primary motor cortex	UBERON:0001384	CCN202002013	Mouse	RNAseq
Pvalb_1	RNAseq 046, 050-055	CS202002013_248		Pvalb_1	Nikolas Jorstad	10.1101/2020.03.31.016972	primary motor cortex	UBERON:0001384	CCN202002013	Mouse	RNAseq
Pvalb_2	RNAseq 048-049	CS202002013_249		Pvalb_2	Nikolas Jorstad	10.1101/2020.03.31.016972	primary motor cortex	UBERON:0001384	CCN202002013	Mouse	RNAseq
L5 IT_1	RNAseq 061-062, 065	CS202002013_250		L5 IT_1	Nikolas Jorstad	10.1101/2020.03.31.016972	primary motor cortex	UBERON:0001384	CCN202002013	Mouse	RNAseq
L6 IT_2	RNAseq 066, 068	CS202002013_251		L6 IT_2	Nikolas Jorstad	10.1101/2020.03.31.016972	primary motor cortex	UBERON:0001384	CCN202002013	Mouse	RNAseq
L5 ET_1	RNAseq 070, 072-073	CS202002013_252		L5 ET_1	Nikolas Jorstad	10.1101/2020.03.31.016972	primary motor cortex	UBERON:0001384	CCN202002013	Mouse	RNAseq
L6 CT_1	RNAseq 075, 077-081	CS202002013_253		L6 CT_1	Nikolas Jorstad	10.1101/2020.03.31.016972	primary motor cortex	UBERON:0001384	CCN202002013	Mouse	RNAseq
Oligo_2	RNAseq 098, 110-112	CS202002013_254		Oligo_2	Nikolas Jorstad	10.1101/2020.03.31.016972	primary motor cortex	UBERON:0001384	CCN202002013	Mouse	RNAseq
VLMC(i)	RNAseq 104-107, 110	CS202002013_255		VLMC(i)	Nikolas Jorstad	10.1101/2020.03.31.016972	primary motor cortex	UBERON:0001384	CCN202002013	Mouse	RNAseq
Large CCK basket cell	RNAseq 009-012	CS202002013_256			Zizhen Yao	10.1101/2020.02.29.970558	primary motor cortex	UBERON:0001384	CCN202002013	Mouse	RNAseq
L5/6 CCK cell	RNAseq 015-017	CS202002013_257			Zizhen Yao	10.1101/2020.02.29.970558	primary motor cortex	UBERON:0001384	CCN202002013	Mouse	RNAseq
L2/3 Bipolar VIP cell	RNAseq 021-025	CS202002013_258			Zizhen Yao	10.1101/2020.02.29.970558	primary motor cortex	UBERON:0001384	CCN202002013	Mouse	RNAseq
L5 T Martinotti cell	RNAseq 030-032	CS202002013_259			Zizhen Yao	10.1101/2020.02.29.970558	primary motor cortex	UBERON:0001384	CCN202002013	Mouse	RNAseq
Lower FS Basket cell	NAseq 049-053	CS202002013_260			Zizhen Yao	10.1101/2020.02.29.970558	primary motor cortex	UBERON:0001384	CCN202002013	Mouse	RNAseq
MY-projecting L5 ET	RNAseq 070-071	CS202002013_261			Zizhen Yao	10.1101/2020.02.29.970558	primary motor cortex	UBERON:0001384	CCN202002013	Mouse	RNAseq
Non-MY-projecting L5 ET	RNAseq 072-073	CS202002013_262			Zizhen Yao	10.1101/2020.02.29.970558	primary motor cortex	UBERON:0001384	CCN202002013	Mouse	RNAseq
Lamp5 Chrna7	DNAm 01	CS202002276_1		RNAseq 001-003 in CCN202002013	Hanqing Liu	10.1101/2020.02.29.970558	primary motor cortex	UBERON:0001384	CCN202002276	Mouse	DNAm
Lamp5 Ndnf	DNAm 02	CS202002276_2		RNAseq 004-006 in CCN202002013	Hanqing Liu	10.1101/2020.02.29.970558	primary motor cortex	UBERON:0001384	CCN202002276	Mouse	DNAm
Lamp5 Ndnf	DNAm 03	CS202002276_3		RNAseq 005 in CCN202002013	Hanqing Liu	10.1101/2020.02.29.970558	primary motor cortex	UBERON:0001384	CCN202002276	Mouse	DNAm
Lamp5 Asph	DNAm 04	CS202002276_4		RNAseq 007-008 in CCN202002013	Hanqing Liu	10.1101/2020.02.29.970558	primary motor cortex	UBERON:0001384	CCN202002276	Mouse	DNAm
Sncg Frem1	DNAm 05	CS202002276_5	Sncg	RNAseq 009-014 in CCN202002013	Hanqing Liu	10.1101/2020.02.29.970558	primary motor cortex	UBERON:0001384	CCN202002276	Mouse	DNAm
Vip Wnt5b	DNAm 06	CS202002276_6		RNAseq 015, 021-025 in CCN202002013	Hanqing Liu	10.1101/2020.02.29.970558	primary motor cortex	UBERON:0001384	CCN202002276	Mouse	DNAm
Vip Tac2	DNAm 07	CS202002276_7		RNAseq 016-018 in CCN202002013	Hanqing Liu	10.1101/2020.02.29.970558	primary motor cortex	UBERON:0001384	CCN202002276	Mouse	DNAm
Vip Crh	DNAm 08	CS202002276_8		RNAseq 019-020, 026-027 in CCN202002013	Hanqing Liu	10.1101/2020.02.29.970558	primary motor cortex	UBERON:0001384	CCN202002276	Mouse	DNAm
Sst Chodl	DNAm 09	CS202002276_9	Sst Chodl	RNAseq 028 in CCN202002013	Hanqing Liu	10.1101/2020.02.29.970558	primary motor cortex	UBERON:0001384	CCN202002276	Mouse	DNAm
Sst Scg5	DNAm 10	CS202002276_10		RNAseq 029-032, 041 in CCN202002013	Hanqing Liu	10.1101/2020.02.29.970558	primary motor cortex	UBERON:0001384	CCN202002276	Mouse	DNAm
Sst Htr1a	DNAm 11	CS202002276_11		RNAseq 033 in CCN202002013	Hanqing Liu	10.1101/2020.02.29.970558	primary motor cortex	UBERON:0001384	CCN202002276	Mouse	DNAm
Sst Kirrel3	DNAm 12	CS202002276_12		RNAseq 034-035 in CCN202002013	Hanqing Liu	10.1101/2020.02.29.970558	primary motor cortex	UBERON:0001384	CCN202002276	Mouse	DNAm
Sst Rbp4	DNAm 13	CS202002276_13		RNAseq 036-037, 046-047 in CCN202002013	Hanqing Liu	10.1101/2020.02.29.970558	primary motor cortex	UBERON:0001384	CCN202002276	Mouse	DNAm
Sst Pcdh11x	DNAm 14	CS202002276_14		RNAseq 038-040 in CCN202002013	Hanqing Liu	10.1101/2020.02.29.970558	primary motor cortex	UBERON:0001384	CCN202002276	Mouse	DNAm
Sst 9630002D21Rik	DNAm 15	CS202002276_15		RNAseq 042-045 in CCN202002013	Hanqing Liu	10.1101/2020.02.29.970558	primary motor cortex	UBERON:0001384	CCN202002276	Mouse	DNAm
Pvalb Tac1	DNAm 16	CS202002276_16		RNAseq 048-053 in CCN202002013	Hanqing Liu	10.1101/2020.02.29.970558	primary motor cortex	UBERON:0001384	CCN202002276	Mouse	DNAm
Pvalb Gpr149	DNAm 17	CS202002276_17		RNAseq 050 in CCN202002013	Hanqing Liu	10.1101/2020.02.29.970558	primary motor cortex	UBERON:0001384	CCN202002276	Mouse	DNAm
Pvalb Plxnc1	DNAm 18	CS202002276_18		RNAseq 054-055 in CCN202002013	Hanqing Liu	10.1101/2020.02.29.970558	primary motor cortex	UBERON:0001384	CCN202002276	Mouse	DNAm
Pvalb Vipr2	DNAm 19	CS202002276_19	Chandelier	RNAseq 056-057 in CCN202002013	Hanqing Liu	10.1101/2020.02.29.970558	primary motor cortex	UBERON:0001384	CCN202002276	Mouse	DNAm
L2/3 IT Greb1l	DNAm 20	CS202002276_20	L2/3 IT	RNAseq 058-060 in CCN202002013	Hanqing Liu	10.1101/2020.02.29.970558	primary motor cortex	UBERON:0001384	CCN202002276	Mouse	DNAm
L5 IT Rspo1_1	DNAm 21	CS202002276_21		RNAseq 061 in CCN202002013	Hanqing Liu	10.1101/2020.02.29.970558	primary motor cortex	UBERON:0001384	CCN202002276	Mouse	DNAm
L5 IT Rspo1_2	DNAm 22	CS202002276_22		RNAseq 062 in CCN202002013	Hanqing Liu	10.1101/2020.02.29.970558	primary motor cortex	UBERON:0001384	CCN202002276	Mouse	DNAm
L5 IT S100b	DNAm 23	CS202002276_23		RNAseq 063-064 in CCN202002013	Hanqing Liu	10.1101/2020.02.29.970558	primary motor cortex	UBERON:0001384	CCN202002276	Mouse	DNAm
L5/6 IT Arhgap15	DNAm 24	CS202002276_24		RNAseq 065, 067 in CCN202002013	Hanqing Liu	10.1101/2020.02.29.970558	primary motor cortex	UBERON:0001384	CCN202002276	Mouse	DNAm
L5 IT Pld5_2	DNAm 25	CS202002276_25		RNAseq 066 in CCN202002013	Hanqing Liu	10.1101/2020.02.29.970558	primary motor cortex	UBERON:0001384	CCN202002276	Mouse	DNAm
L6 IT_2	DNAm 26	CS202002276_26		RNAseq 068 in CCN202002013	Hanqing Liu	10.1101/2020.02.29.970558	primary motor cortex	UBERON:0001384	CCN202002276	Mouse	DNAm
L6 IT Car3	DNAm 27	CS202002276_27	L6 IT Car3	RNAseq 069 in CCN202002013	Hanqing Liu	10.1101/2020.02.29.970558	primary motor cortex	UBERON:0001384	CCN202002276	Mouse	DNAm
L5 ET	DNAm 28	CS202002276_28	L5 ET	RNAseq 070-073 in CCN202002013	Hanqing Liu	10.1101/2020.02.29.970558	primary motor cortex	UBERON:0001384	CCN202002276	Mouse	DNAm
L5/6 NP CT Cdh18	DNAm 29	CS202002276_29	L5/6 NP	RNAseq 074, 079-080 in CCN202002013	Hanqing Liu	10.1101/2020.02.29.970558	primary motor cortex	UBERON:0001384	CCN202002276	Mouse	DNAm
L6 CT Gpr139	DNAm 30	CS202002276_30		RNAseq 075 in CCN202002013	Hanqing Liu	10.1101/2020.02.29.970558	primary motor cortex	UBERON:0001384	CCN202002276	Mouse	DNAm
L6 CT Cpa6	DNAm 31	CS202002276_31		RNAseq 076 in CCN202002013	Hanqing Liu	10.1101/2020.02.29.970558	primary motor cortex	UBERON:0001384	CCN202002276	Mouse	DNAm
L6 CT Grp	DNAm 32	CS202002276_32		RNAseq 077 in CCN202002013	Hanqing Liu	10.1101/2020.02.29.970558	primary motor cortex	UBERON:0001384	CCN202002276	Mouse	DNAm
L6 CT Pou3f2	DNAm 33	CS202002276_33		RNAseq 078 in CCN202002013	Hanqing Liu	10.1101/2020.02.29.970558	primary motor cortex	UBERON:0001384	CCN202002276	Mouse	DNAm
L6b Ctgf	DNAm 34	CS202002276_34	L6b	RNAseq 081-085 in CCN202002013	Hanqing Liu	10.1101/2020.02.29.970558	primary motor cortex	UBERON:0001384	CCN202002276	Mouse	DNAm
L5/6 NP Lypd1	DNAm 35	CS202002276_35		RNAseq 086-088 in CCN202002013	Hanqing Liu	10.1101/2020.02.29.970558	primary motor cortex	UBERON:0001384	CCN202002276	Mouse	DNAm
OPC Pdgfra	DNAm 36	CS202002276_36	OPC	RNAseq 091 in CCN202002013	Hanqing Liu	10.1101/2020.02.29.970558	primary motor cortex	UBERON:0001384	CCN202002276	Mouse	DNAm
Astro Rorb Prex2	DNAm 37	CS202002276_37	Astrocyte	RNAseq 92-94 in CCN202002013	Hanqing Liu	10.1101/2020.02.29.970558	primary motor cortex	UBERON:0001384	CCN202002276	Mouse	DNAm
Oligo Plp1	DNAm 38	CS202002276_38	Oligodendrocyte	RNAseq 095, 097-102 in CCN202002013	Hanqing Liu	10.1101/2020.02.29.970558	primary motor cortex	UBERON:0001384	CCN202002276	Mouse	DNAm
VLMC Lama1	DNAm 39	CS202002276_39		RNAseq 104-105, 107 in CCN202002013	Hanqing Liu	10.1101/2020.02.29.970558	primary motor cortex	UBERON:0001384	CCN202002276	Mouse	DNAm
VLMC Bnc2	DNAm 40	CS202002276_40		RNAseq 106, 108-110 in CCN202002013	Hanqing Liu	10.1101/2020.02.29.970558	primary motor cortex	UBERON:0001384	CCN202002276	Mouse	DNAm
SMC-Peri	DNAm 41	CS202002276_41	SMC	RNAseq 111-112 in CCN202002013	Hanqing Liu	10.1101/2020.02.29.970558	primary motor cortex	UBERON:0001384	CCN202002276	Mouse	DNAm
Micro-PVM Inpp5d	DNAm 42	CS202002276_42	Microglia-PVM	RNAseq 113, 115-116 in CCN202002013	Hanqing Liu	10.1101/2020.02.29.970558	primary motor cortex	UBERON:0001384	CCN202002276	Mouse	DNAm
VLMC	DNAm 43	CS202002276_43	VLMC	RNAseq 104-110 in CCN202002013	Hanqing Liu	10.1101/2020.02.29.970558	primary motor cortex	UBERON:0001384	CCN202002276	Mouse	DNAm
Lamp5 Ndnf	ATACseq 01	CS202002277_1	Lamp5	RNAseq 001-005 in CCN202002013	Yang Li	10.1101/2020.02.29.970558	primary motor cortex	UBERON:0001384	CCN202002277	Mouse	ATACseq
Lamp5 Arhgdib	ATACseq 02	CS202002277_2		RNAseq 006 in CCN202002013	Yang Li	10.1101/2020.02.29.970558	primary motor cortex	UBERON:0001384	CCN202002277	Mouse	ATACseq
Lamp5 Slc35d3	ATACseq 03	CS202002277_3		RNAseq 007 in CCN202002013	Yang Li	10.1101/2020.02.29.970558	primary motor cortex	UBERON:0001384	CCN202002277	Mouse	ATACseq
Lamp5 Lhx6	ATACseq 04	CS202002277_4	Lamp5 Lhx6	RNAseq 008 in CCN202002013	Yang Li	10.1101/2020.02.29.970558	primary motor cortex	UBERON:0001384	CCN202002277	Mouse	ATACseq
Sncg	ATACseq 05	CS202002277_5	Sncg	RNAseq 009-014 in CCN202002013	Yang Li	10.1101/2020.02.29.970558	primary motor cortex	UBERON:0001384	CCN202002277	Mouse	ATACseq
Vip Hcls1	ATACseq 06	CS202002277_6		RNAseq 015-018 in CCN202002013	Yang Li	10.1101/2020.02.29.970558	primary motor cortex	UBERON:0001384	CCN202002277	Mouse	ATACseq
Vip Lipg	ATACseq 07	CS202002277_7		RNAseq 019-020, 026-027 in CCN202002013	Yang Li	10.1101/2020.02.29.970558	primary motor cortex	UBERON:0001384	CCN202002277	Mouse	ATACseq
Vip Gcnt4	ATACseq 08	CS202002277_8		RNAseq 021-022 in CCN202002013	Yang Li	10.1101/2020.02.29.970558	primary motor cortex	UBERON:0001384	CCN202002277	Mouse	ATACseq
Vip Chat	ATACseq 09	CS202002277_9		RNAseq 023-025 in CCN202002013	Yang Li	10.1101/2020.02.29.970558	primary motor cortex	UBERON:0001384	CCN202002277	Mouse	ATACseq
Sst Chodl	ATACseq 10	CS202002277_10	Sst Chodl	RNAseq 028 in CCN202002013	Yang Li	10.1101/2020.02.29.970558	primary motor cortex	UBERON:0001384	CCN202002277	Mouse	ATACseq
Sst Myh8	ATACseq 11	CS202002277_11		RNAseq 029-033 in CCN202002013	Yang Li	10.1101/2020.02.29.970558	primary motor cortex	UBERON:0001384	CCN202002277	Mouse	ATACseq
Sst Man1a	ATACseq 12	CS202002277_12		RNAseq 034-035, 038-041 in CCN202002013	Yang Li	10.1101/2020.02.29.970558	primary motor cortex	UBERON:0001384	CCN202002277	Mouse	ATACseq
Sst Stk33	ATACseq 13	CS202002277_13		RNAseq 036-037, 042-047 in CCN202002013	Yang Li	10.1101/2020.02.29.970558	primary motor cortex	UBERON:0001384	CCN202002277	Mouse	ATACseq
Pvalb Ntf3	ATACseq 14	CS202002277_14		RNAseq 048-053 in CCN202002013	Yang Li	10.1101/2020.02.29.970558	primary motor cortex	UBERON:0001384	CCN202002277	Mouse	ATACseq
Pvalb Tac1	ATACseq 15	CS202002277_15		RNAseq 054-055 in CCN202002013	Yang Li	10.1101/2020.02.29.970558	primary motor cortex	UBERON:0001384	CCN202002277	Mouse	ATACseq
Pvalb Vipr2	ATACseq 16	CS202002277_16	Chandelier	RNAseq 056-057 in CCN202002013	Yang Li	10.1101/2020.02.29.970558	primary motor cortex	UBERON:0001384	CCN202002277	Mouse	ATACseq
L2/3_1	ATACseq 17	CS202002277_17	L2/3 IT	RNAseq 058-060 in CCN202002013	Yang Li	10.1101/2020.02.29.970558	primary motor cortex	UBERON:0001384	CCN202002277	Mouse	ATACseq
L4	ATACseq 18	CS202002277_18		RNAseq 061 in CCN202002013	Yang Li	10.1101/2020.02.29.970558	primary motor cortex	UBERON:0001384	CCN202002277	Mouse	ATACseq
L5 IT_1	ATACseq 19	CS202002277_19		RNAseq 062 in CCN202002013	Yang Li	10.1101/2020.02.29.970558	primary motor cortex	UBERON:0001384	CCN202002277	Mouse	ATACseq
L5 IT_2	ATACseq 20	CS202002277_20		RNAseq 063-065 in CCN202002013	Yang Li	10.1101/2020.02.29.970558	primary motor cortex	UBERON:0001384	CCN202002277	Mouse	ATACseq
L6 IT	ATACseq 21	CS202002277_21	L6 IT	RNAseq 066-068 in CCN202002013	Yang Li	10.1101/2020.02.29.970558	primary motor cortex	UBERON:0001384	CCN202002277	Mouse	ATACseq
L5 ET	ATACseq 22	CS202002277_22	L5 ET	RNAseq 070-073 in CCN202002013	Yang Li	10.1101/2020.02.29.970558	primary motor cortex	UBERON:0001384	CCN202002277	Mouse	ATACseq
L5/6 NP	ATACseq 23	CS202002277_23	L5/6 NP	RNAseq 074, 086-088 in CCN202002013	Yang Li	10.1101/2020.02.29.970558	primary motor cortex	UBERON:0001384	CCN202002277	Mouse	ATACseq
L6 CT	ATACseq 24	CS202002277_24	L6 CT	RNAseq 075-081 in CCN202002013	Yang Li	10.1101/2020.02.29.970558	primary motor cortex	UBERON:0001384	CCN202002277	Mouse	ATACseq
OPC	ATACseq 25	CS202002277_25	OPC	RNAseq 091 in CCN202002013	Yang Li	10.1101/2020.02.29.970558	primary motor cortex	UBERON:0001384	CCN202002277	Mouse	ATACseq
Astro	ATACseq 26	CS202002277_26	Astrocyte	RNAseq 092-094 in CCN202002013	Yang Li	10.1101/2020.02.29.970558	primary motor cortex	UBERON:0001384	CCN202002277	Mouse	ATACseq
Oligo	ATACseq 27	CS202002277_27	Oligodendrocyte	RNAseq 095-012 in CCN202002013	Yang Li	10.1101/2020.02.29.970558	primary motor cortex	UBERON:0001384	CCN202002277	Mouse	ATACseq
Endo	ATACseq 28	CS202002277_28	Endo	RNAseq 103 in CCN202002013	Yang Li	10.1101/2020.02.29.970558	primary motor cortex	UBERON:0001384	CCN202002277	Mouse	ATACseq
VLMC	ATACseq 29	CS202002277_29	VLMC	RNAseq 104-110 in CCN202002013	Yang Li	10.1101/2020.02.29.970558	primary motor cortex	UBERON:0001384	CCN202002277	Mouse	ATACseq
SMC-Peri	ATACseq 30	CS202002277_30	SMC-Pericyte	RNAseq 111-112 in CCN202002013	Yang Li	10.1101/2020.02.29.970558	primary motor cortex	UBERON:0001384	CCN202002277	Mouse	ATACseq
Micro-PVM	ATACseq 31	CS202002277_31	Microglia-PVM	RNAseq 113-116 in CCN202002013	Yang Li	10.1101/2020.02.29.970558	primary motor cortex	UBERON:0001384	CCN202002277	Mouse	ATACseq
Exc L5 FEZF2 LOC106993015	RNAseq 001	CS202002271_1			Nikolas Jorstad	10.1101/2020.03.31.016972	primary motor cortex	UBERON:0001384	CCN202002271	Macaque	RNAseq
Exc L5 FEZF2 LOC114676463	RNAseq 002	CS202002271_2			Nikolas Jorstad	10.1101/2020.03.31.016972	primary motor cortex	UBERON:0001384	CCN202002271	Macaque	RNAseq
Exc L5 RORB LOC106992498	RNAseq 003	CS202002271_3			Nikolas Jorstad	10.1101/2020.03.31.016972	primary motor cortex	UBERON:0001384	CCN202002271	Macaque	RNAseq
Exc L5 RORB COL13A1	RNAseq 004	CS202002271_4			Nikolas Jorstad	10.1101/2020.03.31.016972	primary motor cortex	UBERON:0001384	CCN202002271	Macaque	RNAseq
Exc L5 RORB LOC106992627	RNAseq 005	CS202002271_5			Nikolas Jorstad	10.1101/2020.03.31.016972	primary motor cortex	UBERON:0001384	CCN202002271	Macaque	RNAseq
Exc L5 THEMIS THEMIS	RNAseq 006	CS202002271_6	L6 IT		Nikolas Jorstad	10.1101/2020.03.31.016972	primary motor cortex	UBERON:0001384	CCN202002271	Macaque	RNAseq
Exc L5 SLC17A7 NTNG2	RNAseq 007	CS202002271_7	L6 IT Car3		Nikolas Jorstad	10.1101/2020.03.31.016972	primary motor cortex	UBERON:0001384	CCN202002271	Macaque	RNAseq
Exc L5 SLC17A7 CCDC60	RNAseq 008	CS202002271_8	L6 CT		Nikolas Jorstad	10.1101/2020.03.31.016972	primary motor cortex	UBERON:0001384	CCN202002271	Macaque	RNAseq
Exc L5 SLC17A7 LOC114676287	RNAseq 009	CS202002271_9			Nikolas Jorstad	10.1101/2020.03.31.016972	primary motor cortex	UBERON:0001384	CCN202002271	Macaque	RNAseq
Exc L5 SLC17A7 OTOGL	RNAseq 010	CS202002271_10			Nikolas Jorstad	10.1101/2020.03.31.016972	primary motor cortex	UBERON:0001384	CCN202002271	Macaque	RNAseq
Exc L5 SLC17A7 LOC114680213	RNAseq 011	CS202002271_11			Nikolas Jorstad	10.1101/2020.03.31.016972	primary motor cortex	UBERON:0001384	CCN202002271	Macaque	RNAseq
Exc L5 SLC17A7 CORIN	RNAseq 012	CS202002271_12			Nikolas Jorstad	10.1101/2020.03.31.016972	primary motor cortex	UBERON:0001384	CCN202002271	Macaque	RNAseq
Exc L5 SLC17A7 TLL1	RNAseq 013	CS202002271_13			Nikolas Jorstad	10.1101/2020.03.31.016972	primary motor cortex	UBERON:0001384	CCN202002271	Macaque	RNAseq
L5 ET	RNAseq 001-002	CS202002271_14	L5 ET		Nikolas Jorstad	10.1101/2020.03.31.016972	primary motor cortex	UBERON:0001384	CCN202002271	Macaque	RNAseq
L5 IT	RNAseq 003-005	CS202002271_15	L5 IT		Nikolas Jorstad	10.1101/2020.03.31.016972	primary motor cortex	UBERON:0001384	CCN202002271	Macaque	RNAseq
L6b	RNAseq 009-010	CS202002271_16	L6b		Nikolas Jorstad	10.1101/2020.03.31.016972	primary motor cortex	UBERON:0001384	CCN202002271	Macaque	RNAseq
L5/6 NP	RNAseq 011-013	CS202002271_17	L5/6 NP		Nikolas Jorstad	10.1101/2020.03.31.016972	primary motor cortex	UBERON:0001384	CCN202002271	Macaque	RNAseq
Non-IT projecting	RNAseq 001-002, 008-013	CS202002271_18	Non-IT projecting		Nikolas Jorstad	10.1101/2020.03.31.016972	primary motor cortex	UBERON:0001384	CCN202002271	Macaque	RNAseq
IT projecting	RNAseq 003-007	CS202002271_19	IT projecting		Nikolas Jorstad	10.1101/2020.03.31.016972	primary motor cortex	UBERON:0001384	CCN202002271	Macaque	RNAseq
Glutamatergic	RNAseq 001-013	CS202002271_20	Glutamatergic		Nikolas Jorstad	10.1101/2020.03.31.016972	primary motor cortex	UBERON:0001384	CCN202002271	Macaque	RNAseq
Lamp5_1	Integrated 01	CS202002270_1			Nikolas Jorstad	10.1101/2020.03.31.016972	primary motor cortex	UBERON:0001384	CCN202002270	Human|Marmoset|Mouse	RNAseq
Lamp5_5	Integrated 02	CS202002270_2			Nikolas Jorstad	10.1101/2020.03.31.016972	primary motor cortex	UBERON:0001384	CCN202002270	Human|Marmoset|Mouse	RNAseq
Lamp5_2	Integrated 03	CS202002270_3		Lamp5 Rosehip	Nikolas Jorstad	10.1101/2020.03.31.016972	primary motor cortex	UBERON:0001384	CCN202002270	Human|Marmoset|Mouse	RNAseq
Lamp5_3	Integrated 04	CS202002270_4	Lamp5 Lhx6		Nikolas Jorstad	10.1101/2020.03.31.016972	primary motor cortex	UBERON:0001384	CCN202002270	Human|Marmoset|Mouse	RNAseq
Sncg_1	Integrated 05	CS202002270_5			Nikolas Jorstad	10.1101/2020.03.31.016972	primary motor cortex	UBERON:0001384	CCN202002270	Human|Marmoset|Mouse	RNAseq
Sncg_2	Integrated 06	CS202002270_6			Nikolas Jorstad	10.1101/2020.03.31.016972	primary motor cortex	UBERON:0001384	CCN202002270	Human|Marmoset|Mouse	RNAseq
Lamp5_4	Integrated 07	CS202002270_7			Nikolas Jorstad	10.1101/2020.03.31.016972	primary motor cortex	UBERON:0001384	CCN202002270	Human|Marmoset|Mouse	RNAseq
Sncg_3	Integrated 08	CS202002270_8			Nikolas Jorstad	10.1101/2020.03.31.016972	primary motor cortex	UBERON:0001384	CCN202002270	Human|Marmoset|Mouse	RNAseq
Sncg_4	Integrated 09	CS202002270_9			Nikolas Jorstad	10.1101/2020.03.31.016972	primary motor cortex	UBERON:0001384	CCN202002270	Human|Marmoset|Mouse	RNAseq
Vip_1	Integrated 10	CS202002270_10			Nikolas Jorstad	10.1101/2020.03.31.016972	primary motor cortex	UBERON:0001384	CCN202002270	Human|Marmoset|Mouse	RNAseq
Vip_2	Integrated 11	CS202002270_11			Nikolas Jorstad	10.1101/2020.03.31.016972	primary motor cortex	UBERON:0001384	CCN202002270	Human|Marmoset|Mouse	RNAseq
Vip_3	Integrated 12	CS202002270_12			Nikolas Jorstad	10.1101/2020.03.31.016972	primary motor cortex	UBERON:0001384	CCN202002270	Human|Marmoset|Mouse	RNAseq
Vip_4	Integrated 13	CS202002270_13			Nikolas Jorstad	10.1101/2020.03.31.016972	primary motor cortex	UBERON:0001384	CCN202002270	Human|Marmoset|Mouse	RNAseq
Sst Chodl	Integrated 14	CS202002270_14	Sst Chodl	Long-range projecting Sst	Nikolas Jorstad	10.1101/2020.03.31.016972	primary motor cortex	UBERON:0001384	CCN202002270	Human|Marmoset|Mouse	RNAseq
Sst_1	Integrated 15	CS202002270_15			Nikolas Jorstad	10.1101/2020.03.31.016972	primary motor cortex	UBERON:0001384	CCN202002270	Human|Marmoset|Mouse	RNAseq
Sst_2	Integrated 16	CS202002270_16			Nikolas Jorstad	10.1101/2020.03.31.016972	primary motor cortex	UBERON:0001384	CCN202002270	Human|Marmoset|Mouse	RNAseq
Sst_4	Integrated 17	CS202002270_17			Nikolas Jorstad	10.1101/2020.03.31.016972	primary motor cortex	UBERON:0001384	CCN202002270	Human|Marmoset|Mouse	RNAseq
Sst_3	Integrated 18	CS202002270_18			Nikolas Jorstad	10.1101/2020.03.31.016972	primary motor cortex	UBERON:0001384	CCN202002270	Human|Marmoset|Mouse	RNAseq
Sst_5	Integrated 19	CS202002270_19			Nikolas Jorstad	10.1101/2020.03.31.016972	primary motor cortex	UBERON:0001384	CCN202002270	Human|Marmoset|Mouse	RNAseq
Sst_6	Integrated 20	CS202002270_20			Nikolas Jorstad	10.1101/2020.03.31.016972	primary motor cortex	UBERON:0001384	CCN202002270	Human|Marmoset|Mouse	RNAseq
Sst_7	Integrated 21	CS202002270_21			Nikolas Jorstad	10.1101/2020.03.31.016972	primary motor cortex	UBERON:0001384	CCN202002270	Human|Marmoset|Mouse	RNAseq
Pvalb_1	Integrated 22	CS202002270_22			Nikolas Jorstad	10.1101/2020.03.31.016972	primary motor cortex	UBERON:0001384	CCN202002270	Human|Marmoset|Mouse	RNAseq
Pvalb_2	Integrated 23	CS202002270_23			Nikolas Jorstad	10.1101/2020.03.31.016972	primary motor cortex	UBERON:0001384	CCN202002270	Human|Marmoset|Mouse	RNAseq
Chandelier	Integrated 24	CS202002270_24	Chandelier		Nikolas Jorstad	10.1101/2020.03.31.016972	primary motor cortex	UBERON:0001384	CCN202002270	Human|Marmoset|Mouse	RNAseq
L2/3 IT	Integrated 25	CS202002270_25	L2/3 IT		Nikolas Jorstad	10.1101/2020.03.31.016972	primary motor cortex	UBERON:0001384	CCN202002270	Human|Marmoset|Mouse	RNAseq
L6 IT_1	Integrated 26	CS202002270_26			Nikolas Jorstad	10.1101/2020.03.31.016972	primary motor cortex	UBERON:0001384	CCN202002270	Human|Marmoset|Mouse	RNAseq
L6 IT_2	Integrated 27	CS202002270_27			Nikolas Jorstad	10.1101/2020.03.31.016972	primary motor cortex	UBERON:0001384	CCN202002270	Human|Marmoset|Mouse	RNAseq
L5 IT_1	Integrated 28	CS202002270_28			Nikolas Jorstad	10.1101/2020.03.31.016972	primary motor cortex	UBERON:0001384	CCN202002270	Human|Marmoset|Mouse	RNAseq
L5 IT_2	Integrated 29	CS202002270_29			Nikolas Jorstad	10.1101/2020.03.31.016972	primary motor cortex	UBERON:0001384	CCN202002270	Human|Marmoset|Mouse	RNAseq
L5 IT_3	Integrated 30	CS202002270_30			Nikolas Jorstad	10.1101/2020.03.31.016972	primary motor cortex	UBERON:0001384	CCN202002270	Human|Marmoset|Mouse	RNAseq
L6 IT_3	Integrated 31	CS202002270_31			Nikolas Jorstad	10.1101/2020.03.31.016972	primary motor cortex	UBERON:0001384	CCN202002270	Human|Marmoset|Mouse	RNAseq
L5 ET_1	Integrated 32	CS202002270_32			Nikolas Jorstad	10.1101/2020.03.31.016972	primary motor cortex	UBERON:0001384	CCN202002270	Human|Marmoset|Mouse	RNAseq
L5 ET_2	Integrated 33	CS202002270_33			Nikolas Jorstad	10.1101/2020.03.31.016972	primary motor cortex	UBERON:0001384	CCN202002270	Human|Marmoset|Mouse	RNAseq
L6 CT_1	Integrated 34	CS202002270_34			Nikolas Jorstad	10.1101/2020.03.31.016972	primary motor cortex	UBERON:0001384	CCN202002270	Human|Marmoset|Mouse	RNAseq
L6 CT_2	Integrated 35	CS202002270_35			Nikolas Jorstad	10.1101/2020.03.31.016972	primary motor cortex	UBERON:0001384	CCN202002270	Human|Marmoset|Mouse	RNAseq
L6b	Integrated 36	CS202002270_36	L6b		Nikolas Jorstad	10.1101/2020.03.31.016972	primary motor cortex	UBERON:0001384	CCN202002270	Human|Marmoset|Mouse	RNAseq
L5/6 NP	Integrated 37	CS202002270_37	L5/6 NP		Nikolas Jorstad	10.1101/2020.03.31.016972	primary motor cortex	UBERON:0001384	CCN202002270	Human|Marmoset|Mouse	RNAseq
OPC	Integrated 38	CS202002270_38	OPC		Nikolas Jorstad	10.1101/2020.03.31.016972	primary motor cortex	UBERON:0001384	CCN202002270	Human|Marmoset|Mouse	RNAseq
Astro_1	Integrated 39	CS202002270_39		ILA / fibrous astrocyte	Nikolas Jorstad	10.1101/2020.03.31.016972	primary motor cortex	UBERON:0001384	CCN202002270	Human|Marmoset|Mouse	RNAseq
Astro_2	Integrated 40	CS202002270_40		Protoplasmic astrocyte	Nikolas Jorstad	10.1101/2020.03.31.016972	primary motor cortex	UBERON:0001384	CCN202002270	Human|Marmoset|Mouse	RNAseq
Oligo_1	Integrated 41	CS202002270_41			Nikolas Jorstad	10.1101/2020.03.31.016972	primary motor cortex	UBERON:0001384	CCN202002270	Human|Marmoset|Mouse	RNAseq
Oligo_2	Integrated 42	CS202002270_42			Nikolas Jorstad	10.1101/2020.03.31.016972	primary motor cortex	UBERON:0001384	CCN202002270	Human|Marmoset|Mouse	RNAseq
Endo	Integrated 43	CS202002270_43	Endothelial		Nikolas Jorstad	10.1101/2020.03.31.016972	primary motor cortex	UBERON:0001384	CCN202002270	Human|Marmoset|Mouse	RNAseq
VLMC	Integrated 44	CS202002270_44	VLMC		Nikolas Jorstad	10.1101/2020.03.31.016972	primary motor cortex	UBERON:0001384	CCN202002270	Human|Marmoset|Mouse	RNAseq
Microglia/PVM	Integrated 45	CS202002270_45	Microglia-PVM		Nikolas Jorstad	10.1101/2020.03.31.016972	primary motor cortex	UBERON:0001384	CCN202002270	Human|Marmoset|Mouse	RNAseq
Lamp5	Integrated 01-04, 07	CS202002270_46	Lamp5		Nikolas Jorstad	10.1101/2020.03.31.016972	primary motor cortex	UBERON:0001384	CCN202002270	Human|Marmoset|Mouse	RNAseq
Sncg	Integrated 05-06, 08-09	CS202002270_47	Sncg		Nikolas Jorstad	10.1101/2020.03.31.016972	primary motor cortex	UBERON:0001384	CCN202002270	Human|Marmoset|Mouse	RNAseq
Vip	Integrated 10-13	CS202002270_48	Vip		Nikolas Jorstad	10.1101/2020.03.31.016972	primary motor cortex	UBERON:0001384	CCN202002270	Human|Marmoset|Mouse	RNAseq
Sst	Integrated 14-21	CS202002270_49	Sst		Nikolas Jorstad	10.1101/2020.03.31.016972	primary motor cortex	UBERON:0001384	CCN202002270	Human|Marmoset|Mouse	RNAseq
Pvalb	Integrated 22-24	CS202002270_50	Pvalb		Nikolas Jorstad	10.1101/2020.03.31.016972	primary motor cortex	UBERON:0001384	CCN202002270	Human|Marmoset|Mouse	RNAseq
L6 IT	Integrated 26-27, 31	CS202002270_51	L6 IT		Nikolas Jorstad	10.1101/2020.03.31.016972	primary motor cortex	UBERON:0001384	CCN202002270	Human|Marmoset|Mouse	RNAseq
L5 IT	Integrated 28-30	CS202002270_52	L5 IT		Nikolas Jorstad	10.1101/2020.03.31.016972	primary motor cortex	UBERON:0001384	CCN202002270	Human|Marmoset|Mouse	RNAseq
L5 ET	Integrated 32-33	CS202002270_53	L5 ET	Betz|L5 PT	Nikolas Jorstad	10.1101/2020.03.31.016972	primary motor cortex	UBERON:0001384	CCN202002270	Human|Marmoset|Mouse	RNAseq
L6 CT	Integrated 34-35	CS202002270_54	L6 CT		Nikolas Jorstad	10.1101/2020.03.31.016972	primary motor cortex	UBERON:0001384	CCN202002270	Human|Marmoset|Mouse	RNAseq
Astro	Integrated 39-40	CS202002270_55	Astrocyte		Nikolas Jorstad	10.1101/2020.03.31.016972	primary motor cortex	UBERON:0001384	CCN202002270	Human|Marmoset|Mouse	RNAseq
Oligo	Integrated 41-42	CS202002270_56	Oligodendrocyte		Nikolas Jorstad	10.1101/2020.03.31.016972	primary motor cortex	UBERON:0001384	CCN202002270	Human|Marmoset|Mouse	RNAseq
CGE/PoA	Integrated 01-13	CS202002270_57	CGE/PoA		Nikolas Jorstad	10.1101/2020.03.31.016972	primary motor cortex	UBERON:0001384	CCN202002270	Human|Marmoset|Mouse	RNAseq
MGE	Integrated 14-24	CS202002270_58	MGE		Nikolas Jorstad	10.1101/2020.03.31.016972	primary motor cortex	UBERON:0001384	CCN202002270	Human|Marmoset|Mouse	RNAseq
IT projecting	Integrated 25-31	CS202002270_59	IT projecting		Nikolas Jorstad	10.1101/2020.03.31.016972	primary motor cortex	UBERON:0001384	CCN202002270	Human|Marmoset|Mouse	RNAseq
Non-IT projecting	Integrated 32-37	CS202002270_60	Non-IT projecting		Nikolas Jorstad	10.1101/2020.03.31.016972	primary motor cortex	UBERON:0001384	CCN202002270	Human|Marmoset|Mouse	RNAseq
Oligo-OPC	Integrated 38, 41-42	CS202002270_61	Oligodendrocyte-OPC		Nikolas Jorstad	10.1101/2020.03.31.016972	primary motor cortex	UBERON:0001384	CCN202002270	Human|Marmoset|Mouse	RNAseq
Other NN	Integrated 43-44	CS202002270_62	Other NN		Nikolas Jorstad	10.1101/2020.03.31.016972	primary motor cortex	UBERON:0001384	CCN202002270	Human|Marmoset|Mouse	RNAseq
GABAergic	Integrated 01-24	CS202002270_63	GABAergic	Inhibitory	Nikolas Jorstad	10.1101/2020.03.31.016972	primary motor cortex	UBERON:0001384	CCN202002270	Human|Marmoset|Mouse	RNAseq
Glutamatergic	Integrated 25-37	CS202002270_64	Glutamatergic	Excitatory	Nikolas Jorstad	10.1101/2020.03.31.016972	primary motor cortex	UBERON:0001384	CCN202002270	Human|Marmoset|Mouse	RNAseq
Non-Neuronal	Integrated 38-45	CS202002270_65	Non-Neuronal		Nikolas Jorstad	10.1101/2020.03.31.016972	primary motor cortex	UBERON:0001384	CCN202002270	Human|Marmoset|Mouse	RNAseq
Inh L1-2 PAX6 CDH12	MTG 001	CS201908210_1			Trygve Bakken	10.1038/s41586-019-1506-7	middle temporal gyrus	UBERON:0002771	CCN201908210	Human	RNAseq
Inh L1-2 PAX6 TNFAIP8L3	MTG 002	CS201908210_2			Trygve Bakken	10.1038/s41586-019-1506-7	middle temporal gyrus	UBERON:0002771	CCN201908210	Human	RNAseq
Inh L1 LAMP5 NMBR	MTG 003	CS201908210_3			Trygve Bakken	10.1038/s41586-019-1506-7	middle temporal gyrus	UBERON:0002771	CCN201908210	Human	RNAseq
Inh L1-4 LAMP5 LCP2	MTG 004	CS201908210_4			Trygve Bakken	10.1038/s41586-019-1506-7	middle temporal gyrus	UBERON:0002771	CCN201908210	Human	RNAseq
Inh L1-2 LAMP5 DBP	MTG 005	CS201908210_5			Trygve Bakken	10.1038/s41586-019-1506-7	middle temporal gyrus	UBERON:0002771	CCN201908210	Human	RNAseq
Inh L2-6 LAMP5 CA1	MTG 006	CS201908210_6		Lamp Lhx6	Trygve Bakken	10.1038/s41586-019-1506-7	middle temporal gyrus	UBERON:0002771	CCN201908210	Human	RNAseq
Inh L1 SST CHRNA4	MTG 007	CS201908210_7			Trygve Bakken	10.1038/s41586-019-1506-7	middle temporal gyrus	UBERON:0002771	CCN201908210	Human	RNAseq
Inh L1-2 ADARB2 MC4R	MTG 008	CS201908210_8			Trygve Bakken	10.1038/s41586-019-1506-7	middle temporal gyrus	UBERON:0002771	CCN201908210	Human	RNAseq
Inh L1-2 SST BAGE2	MTG 009	CS201908210_9			Trygve Bakken	10.1038/s41586-019-1506-7	middle temporal gyrus	UBERON:0002771	CCN201908210	Human	RNAseq
Inh L1-3 VIP SYT6	MTG 010	CS201908210_10			Trygve Bakken	10.1038/s41586-019-1506-7	middle temporal gyrus	UBERON:0002771	CCN201908210	Human	RNAseq
Inh L1-2 VIP TSPAN12	MTG 011	CS201908210_11			Trygve Bakken	10.1038/s41586-019-1506-7	middle temporal gyrus	UBERON:0002771	CCN201908210	Human	RNAseq
Inh L1-4 VIP CHRNA6	MTG 012	CS201908210_12			Trygve Bakken	10.1038/s41586-019-1506-7	middle temporal gyrus	UBERON:0002771	CCN201908210	Human	RNAseq
Inh L1-3 VIP ADAMTSL1	MTG 013	CS201908210_13			Trygve Bakken	10.1038/s41586-019-1506-7	middle temporal gyrus	UBERON:0002771	CCN201908210	Human	RNAseq
Inh L1-4 VIP PENK	MTG 014	CS201908210_14			Trygve Bakken	10.1038/s41586-019-1506-7	middle temporal gyrus	UBERON:0002771	CCN201908210	Human	RNAseq
Inh L2-6 VIP QPCT	MTG 015	CS201908210_15			Trygve Bakken	10.1038/s41586-019-1506-7	middle temporal gyrus	UBERON:0002771	CCN201908210	Human	RNAseq
Inh L3-6 VIP HS3ST3A1	MTG 016	CS201908210_16			Trygve Bakken	10.1038/s41586-019-1506-7	middle temporal gyrus	UBERON:0002771	CCN201908210	Human	RNAseq
Inh L1-2 VIP PCDH20	MTG 017	CS201908210_17			Trygve Bakken	10.1038/s41586-019-1506-7	middle temporal gyrus	UBERON:0002771	CCN201908210	Human	RNAseq
Inh L2-5 VIP SERPINF1	MTG 018	CS201908210_18			Trygve Bakken	10.1038/s41586-019-1506-7	middle temporal gyrus	UBERON:0002771	CCN201908210	Human	RNAseq
Inh L2-5 VIP TYR	MTG 019	CS201908210_19			Trygve Bakken	10.1038/s41586-019-1506-7	middle temporal gyrus	UBERON:0002771	CCN201908210	Human	RNAseq
Inh L1-3 VIP CHRM2	MTG 020	CS201908210_20			Trygve Bakken	10.1038/s41586-019-1506-7	middle temporal gyrus	UBERON:0002771	CCN201908210	Human	RNAseq
Inh L2-4 VIP CBLN1	MTG 021	CS201908210_21			Trygve Bakken	10.1038/s41586-019-1506-7	middle temporal gyrus	UBERON:0002771	CCN201908210	Human	RNAseq
Inh L1-3 VIP CCDC184	MTG 022	CS201908210_22			Trygve Bakken	10.1038/s41586-019-1506-7	middle temporal gyrus	UBERON:0002771	CCN201908210	Human	RNAseq
Inh L1-3 VIP GGH	MTG 023	CS201908210_23			Trygve Bakken	10.1038/s41586-019-1506-7	middle temporal gyrus	UBERON:0002771	CCN201908210	Human	RNAseq
Inh L1-2 VIP LBH	MTG 024	CS201908210_24			Trygve Bakken	10.1038/s41586-019-1506-7	middle temporal gyrus	UBERON:0002771	CCN201908210	Human	RNAseq
Inh L2-3 VIP CASC6	MTG 025	CS201908210_25			Trygve Bakken	10.1038/s41586-019-1506-7	middle temporal gyrus	UBERON:0002771	CCN201908210	Human	RNAseq
Inh L2-4 VIP SPAG17	MTG 026	CS201908210_26			Trygve Bakken	10.1038/s41586-019-1506-7	middle temporal gyrus	UBERON:0002771	CCN201908210	Human	RNAseq
Inh L1-4 VIP OPRM1	MTG 027	CS201908210_27			Trygve Bakken	10.1038/s41586-019-1506-7	middle temporal gyrus	UBERON:0002771	CCN201908210	Human	RNAseq
Inh L3-6 SST NPY	MTG 028	CS201908210_28	Sst Chodl		Trygve Bakken	10.1038/s41586-019-1506-7	middle temporal gyrus	UBERON:0002771	CCN201908210	Human	RNAseq
Inh L3-6 SST HPGD	MTG 029	CS201908210_29			Trygve Bakken	10.1038/s41586-019-1506-7	middle temporal gyrus	UBERON:0002771	CCN201908210	Human	RNAseq
Inh L4-6 SST B3GAT2	MTG 030	CS201908210_30			Trygve Bakken	10.1038/s41586-019-1506-7	middle temporal gyrus	UBERON:0002771	CCN201908210	Human	RNAseq
Inh L5-6 SST KLHDC8A	MTG 031	CS201908210_31			Trygve Bakken	10.1038/s41586-019-1506-7	middle temporal gyrus	UBERON:0002771	CCN201908210	Human	RNAseq
Inh L5-6 SST NPM1P10	MTG 032	CS201908210_32			Trygve Bakken	10.1038/s41586-019-1506-7	middle temporal gyrus	UBERON:0002771	CCN201908210	Human	RNAseq
Inh L4-6 SST GXYLT2	MTG 033	CS201908210_33			Trygve Bakken	10.1038/s41586-019-1506-7	middle temporal gyrus	UBERON:0002771	CCN201908210	Human	RNAseq
Inh L4-5 SST STK32A	MTG 034	CS201908210_34			Trygve Bakken	10.1038/s41586-019-1506-7	middle temporal gyrus	UBERON:0002771	CCN201908210	Human	RNAseq
Inh L1-3 SST CALB1	MTG 035	CS201908210_35			Trygve Bakken	10.1038/s41586-019-1506-7	middle temporal gyrus	UBERON:0002771	CCN201908210	Human	RNAseq
Inh L3-5 SST ADGRG6	MTG 036	CS201908210_36			Trygve Bakken	10.1038/s41586-019-1506-7	middle temporal gyrus	UBERON:0002771	CCN201908210	Human	RNAseq
Inh L2-4 SST FRZB	MTG 037	CS201908210_37			Trygve Bakken	10.1038/s41586-019-1506-7	middle temporal gyrus	UBERON:0002771	CCN201908210	Human	RNAseq
Inh L5-6 SST TH	MTG 038	CS201908210_38			Trygve Bakken	10.1038/s41586-019-1506-7	middle temporal gyrus	UBERON:0002771	CCN201908210	Human	RNAseq
Inh L5-6 LHX6 GLP1R	MTG 039	CS201908210_39			Trygve Bakken	10.1038/s41586-019-1506-7	middle temporal gyrus	UBERON:0002771	CCN201908210	Human	RNAseq
Inh L5-6 PVALB LGR5	MTG 040	CS201908210_40			Trygve Bakken	10.1038/s41586-019-1506-7	middle temporal gyrus	UBERON:0002771	CCN201908210	Human	RNAseq
Inh L4-5 PVALB MEPE	MTG 041	CS201908210_41			Trygve Bakken	10.1038/s41586-019-1506-7	middle temporal gyrus	UBERON:0002771	CCN201908210	Human	RNAseq
Inh L2-4 PVALB WFDC2	MTG 042	CS201908210_42			Trygve Bakken	10.1038/s41586-019-1506-7	middle temporal gyrus	UBERON:0002771	CCN201908210	Human	RNAseq
Inh L4-6 PVALB SULF1	MTG 043	CS201908210_43			Trygve Bakken	10.1038/s41586-019-1506-7	middle temporal gyrus	UBERON:0002771	CCN201908210	Human	RNAseq
Inh L5-6 SST MIR548F2	MTG 044	CS201908210_44			Trygve Bakken	10.1038/s41586-019-1506-7	middle temporal gyrus	UBERON:0002771	CCN201908210	Human	RNAseq
Inh L2-5 PVALB SCUBE3	MTG 045	CS201908210_45	Chandelier		Trygve Bakken|Nathan Gouwens	10.1038/s41586-019-1506-7|10.1101/2020.02.03.932244	middle temporal gyrus	UBERON:0002771	CCN201908210	Human	RNAseq
Exc L2 LAMP5 LTK	MTG 046	CS201908210_46			Trygve Bakken	10.1038/s41586-019-1506-7	middle temporal gyrus	UBERON:0002771	CCN201908210	Human	RNAseq
Exc L2-4 LINC00507 GLP2R	MTG 047	CS201908210_47			Trygve Bakken	10.1038/s41586-019-1506-7	middle temporal gyrus	UBERON:0002771	CCN201908210	Human	RNAseq
Exc L2-3 LINC00507 FREM3	MTG 048	CS201908210_48			Trygve Bakken	10.1038/s41586-019-1506-7	middle temporal gyrus	UBERON:0002771	CCN201908210	Human	RNAseq
Exc L5-6 THEMIS C1QL3	MTG 049	CS201908210_49			Trygve Bakken	10.1038/s41586-019-1506-7	middle temporal gyrus	UBERON:0002771	CCN201908210	Human	RNAseq
Exc L3-4 RORB CARM1P1	MTG 050	CS201908210_50			Trygve Bakken	10.1038/s41586-019-1506-7	middle temporal gyrus	UBERON:0002771	CCN201908210	Human	RNAseq
Exc L3-5 RORB ESR1	MTG 051	CS201908210_51			Trygve Bakken	10.1038/s41586-019-1506-7	middle temporal gyrus	UBERON:0002771	CCN201908210	Human	RNAseq
Exc L3-5 RORB COL22A1	MTG 052	CS201908210_52			Trygve Bakken	10.1038/s41586-019-1506-7	middle temporal gyrus	UBERON:0002771	CCN201908210	Human	RNAseq
Exc L3-5 RORB FILIP1L	MTG 053	CS201908210_53			Trygve Bakken	10.1038/s41586-019-1506-7	middle temporal gyrus	UBERON:0002771	CCN201908210	Human	RNAseq
Exc L3-5 RORB TWIST2	MTG 054	CS201908210_54			Trygve Bakken	10.1038/s41586-019-1506-7	middle temporal gyrus	UBERON:0002771	CCN201908210	Human	RNAseq
Exc L4-5 RORB FOLH1B	MTG 055	CS201908210_55			Trygve Bakken	10.1038/s41586-019-1506-7	middle temporal gyrus	UBERON:0002771	CCN201908210	Human	RNAseq
Exc L4-6 RORB SEMA3E	MTG 056	CS201908210_56			Trygve Bakken	10.1038/s41586-019-1506-7	middle temporal gyrus	UBERON:0002771	CCN201908210	Human	RNAseq
Exc L4-5 RORB DAPK2	MTG 057	CS201908210_57			Trygve Bakken	10.1038/s41586-019-1506-7	middle temporal gyrus	UBERON:0002771	CCN201908210	Human	RNAseq
Exc L5-6 RORB TTC12	MTG 058	CS201908210_58			Trygve Bakken	10.1038/s41586-019-1506-7	middle temporal gyrus	UBERON:0002771	CCN201908210	Human	RNAseq
Exc L4-6 RORB C1R	MTG 059	CS201908210_59			Trygve Bakken	10.1038/s41586-019-1506-7	middle temporal gyrus	UBERON:0002771	CCN201908210	Human	RNAseq
Exc L4-5 FEZF2 SCN4B	MTG 060	CS201908210_60	L5 ET		Trygve Bakken|Bosiljka Tasic	10.1038/s41586-019-1506-7|10.1038/s41586-018-0654-5	middle temporal gyrus	UBERON:0002771	CCN201908210	Human	RNAseq
Exc L5-6 THEMIS DCSTAMP	MTG 061	CS201908210_61			Trygve Bakken	10.1038/s41586-019-1506-7	middle temporal gyrus	UBERON:0002771	CCN201908210	Human	RNAseq
Exc L5-6 THEMIS CRABP1	MTG 062	CS201908210_62			Trygve Bakken	10.1038/s41586-019-1506-7	middle temporal gyrus	UBERON:0002771	CCN201908210	Human	RNAseq
Exc L5-6 THEMIS FGF10	MTG 063	CS201908210_63			Trygve Bakken	10.1038/s41586-019-1506-7	middle temporal gyrus	UBERON:0002771	CCN201908210	Human	RNAseq
Exc L4-6 FEZF2 IL26	MTG 064	CS201908210_64	L5/6 NP		Trygve Bakken|Bosiljka Tasic	10.1038/s41586-019-1506-7|10.1038/s41586-018-0654-5	middle temporal gyrus	UBERON:0002771	CCN201908210	Human	RNAseq
Exc L5-6 FEZF2 ABO	MTG 065	CS201908210_65	L6 CT		Trygve Bakken|Bosiljka Tasic	10.1038/s41586-019-1506-7|10.1038/s41586-018-0654-5	middle temporal gyrus	UBERON:0002771	CCN201908210	Human	RNAseq
Exc L6 FEZF2 SCUBE1	MTG 066	CS201908210_66			Trygve Bakken	10.1038/s41586-019-1506-7	middle temporal gyrus	UBERON:0002771	CCN201908210	Human	RNAseq
Exc L5-6 FEZF2 IL15	MTG 067	CS201908210_67			Trygve Bakken	10.1038/s41586-019-1506-7	middle temporal gyrus	UBERON:0002771	CCN201908210	Human	RNAseq
Exc L6 FEZF2 OR2T8	MTG 068	CS201908210_68			Trygve Bakken	10.1038/s41586-019-1506-7	middle temporal gyrus	UBERON:0002771	CCN201908210	Human	RNAseq
Exc L5-6 FEZF2 EFTUD1P1	MTG 069	CS201908210_69			Trygve Bakken	10.1038/s41586-019-1506-7	middle temporal gyrus	UBERON:0002771	CCN201908210	Human	RNAseq
OPC L1-6 PDGFRA	MTG 070	CS201908210_70	OPC		Trygve Bakken	10.1038/s41586-019-1506-7	middle temporal gyrus	UBERON:0002771	CCN201908210	Human	RNAseq
Astro L1-6 FGFR3 SLC14A1	MTG 071	CS201908210_71			Trygve Bakken	10.1038/s41586-019-1506-7	middle temporal gyrus	UBERON:0002771	CCN201908210	Human	RNAseq
Astro L1-2 FGFR3 GFAP	MTG 072	CS201908210_72			Trygve Bakken	10.1038/s41586-019-1506-7	middle temporal gyrus	UBERON:0002771	CCN201908210	Human	RNAseq
Oligo L1-6 OPALIN	MTG 073	CS201908210_73	Oligo		Trygve Bakken	10.1038/s41586-019-1506-7	middle temporal gyrus	UBERON:0002771	CCN201908210	Human	RNAseq
Endo L2-6 NOSTRIN	MTG 074	CS201908210_74	Endo		Trygve Bakken	10.1038/s41586-019-1506-7	middle temporal gyrus	UBERON:0002771	CCN201908210	Human	RNAseq
Micro L1-6 TYROBP	MTG 075	CS201908210_75	Microglia-PVM		Trygve Bakken	10.1038/s41586-019-1506-7	middle temporal gyrus	UBERON:0002771	CCN201908210	Human	RNAseq
	All cells	CS201908210_76			Trygve Bakken	10.1038/s41586-019-1506-7	middle temporal gyrus	UBERON:0002771	CCN201908210	Human	RNAseq
Neuronal	MTG 001-069	CS201908210_77			Trygve Bakken	10.1038/s41586-019-1506-7	middle temporal gyrus	UBERON:0002771	CCN201908210	Human	RNAseq
Inhibitory	MTG 001-045	CS201908210_78	GABAergic		Trygve Bakken	10.1038/s41586-019-1506-7	middle temporal gyrus	UBERON:0002771	CCN201908210	Human	RNAseq
ADARB2 (CGE)	MTG 001-027	CS201908210_79	CGE/PoA		Trygve Bakken	10.1038/s41586-019-1506-7	middle temporal gyrus	UBERON:0002771	CCN201908210	Human	RNAseq
LAMP5/PAX6	MTG 001-006	CS201908210_80			Trygve Bakken	10.1038/s41586-019-1506-7	middle temporal gyrus	UBERON:0002771	CCN201908210	Human	RNAseq
	MTG 001-002	CS201908210_81	Pax6		Trygve Bakken	10.1038/s41586-019-1506-7	middle temporal gyrus	UBERON:0002771	CCN201908210	Human	RNAseq
	MTG 003-006	CS201908210_82			Trygve Bakken	10.1038/s41586-019-1506-7	middle temporal gyrus	UBERON:0002771	CCN201908210	Human	RNAseq
	MTG 004-006	CS201908210_83			Trygve Bakken	10.1038/s41586-019-1506-7	middle temporal gyrus	UBERON:0002771	CCN201908210	Human	RNAseq
	MTG 004-005	CS201908210_84		Lamp5 Rosehip	Trygve Bakken||Trygve Bakken	10.1038/s41586-019-1506-7||10.1038/s41593-018-0205-2	middle temporal gyrus	UBERON:0002771	CCN201908210	Human	RNAseq
VIP	MTG 007-027	CS201908210_85			Trygve Bakken	10.1038/s41586-019-1506-7	middle temporal gyrus	UBERON:0002771	CCN201908210	Human	RNAseq
	MTG 007-014	CS201908210_86			Trygve Bakken	10.1038/s41586-019-1506-7	middle temporal gyrus	UBERON:0002771	CCN201908210	Human	RNAseq
	MTG 007-012	CS201908210_87			Trygve Bakken	10.1038/s41586-019-1506-7	middle temporal gyrus	UBERON:0002771	CCN201908210	Human	RNAseq
	MTG 007-009	CS201908210_88			Trygve Bakken	10.1038/s41586-019-1506-7	middle temporal gyrus	UBERON:0002771	CCN201908210	Human	RNAseq
	MTG 007-008	CS201908210_89			Trygve Bakken	10.1038/s41586-019-1506-7	middle temporal gyrus	UBERON:0002771	CCN201908210	Human	RNAseq
	MTG 010-012	CS201908210_90			Trygve Bakken	10.1038/s41586-019-1506-7	middle temporal gyrus	UBERON:0002771	CCN201908210	Human	RNAseq
	MTG 011-012	CS201908210_91			Trygve Bakken	10.1038/s41586-019-1506-7	middle temporal gyrus	UBERON:0002771	CCN201908210	Human	RNAseq
	MTG 013-014	CS201908210_92			Trygve Bakken	10.1038/s41586-019-1506-7	middle temporal gyrus	UBERON:0002771	CCN201908210	Human	RNAseq
	MTG 015-027	CS201908210_93			Trygve Bakken	10.1038/s41586-019-1506-7	middle temporal gyrus	UBERON:0002771	CCN201908210	Human	RNAseq
	MTG 015-019	CS201908210_94			Trygve Bakken	10.1038/s41586-019-1506-7	middle temporal gyrus	UBERON:0002771	CCN201908210	Human	RNAseq
	MTG 015-017	CS201908210_95			Trygve Bakken	10.1038/s41586-019-1506-7	middle temporal gyrus	UBERON:0002771	CCN201908210	Human	RNAseq
	MTG 015-016	CS201908210_96			Trygve Bakken	10.1038/s41586-019-1506-7	middle temporal gyrus	UBERON:0002771	CCN201908210	Human	RNAseq
	MTG 018-019	CS201908210_97			Trygve Bakken	10.1038/s41586-019-1506-7	middle temporal gyrus	UBERON:0002771	CCN201908210	Human	RNAseq
	MTG 020-027	CS201908210_98			Trygve Bakken	10.1038/s41586-019-1506-7	middle temporal gyrus	UBERON:0002771	CCN201908210	Human	RNAseq
	MTG 020-023	CS201908210_99			Trygve Bakken	10.1038/s41586-019-1506-7	middle temporal gyrus	UBERON:0002771	CCN201908210	Human	RNAseq
	MTG 020-022	CS201908210_100			Trygve Bakken	10.1038/s41586-019-1506-7	middle temporal gyrus	UBERON:0002771	CCN201908210	Human	RNAseq
	MTG 020-021	CS201908210_101			Trygve Bakken	10.1038/s41586-019-1506-7	middle temporal gyrus	UBERON:0002771	CCN201908210	Human	RNAseq
	MTG 024-027	CS201908210_102			Trygve Bakken	10.1038/s41586-019-1506-7	middle temporal gyrus	UBERON:0002771	CCN201908210	Human	RNAseq
	MTG 024-025	CS201908210_103			Trygve Bakken	10.1038/s41586-019-1506-7	middle temporal gyrus	UBERON:0002771	CCN201908210	Human	RNAseq
	MTG 026-027	CS201908210_104			Trygve Bakken	10.1038/s41586-019-1506-7	middle temporal gyrus	UBERON:0002771	CCN201908210	Human	RNAseq
LHX6 (MGE)	MTG 028-045	CS201908210_105			Trygve Bakken	10.1038/s41586-019-1506-7	middle temporal gyrus	UBERON:0002771	CCN201908210	Human	RNAseq
	MTG 028-044	CS201908210_106			Trygve Bakken	10.1038/s41586-019-1506-7	middle temporal gyrus	UBERON:0002771	CCN201908210	Human	RNAseq
	MTG 029-044	CS201908210_107			Trygve Bakken	10.1038/s41586-019-1506-7	middle temporal gyrus	UBERON:0002771	CCN201908210	Human	RNAseq
SST	MTG 029-038	CS201908210_108	Sst		Trygve Bakken	10.1038/s41586-019-1506-7	middle temporal gyrus	UBERON:0002771	CCN201908210	Human	RNAseq
	MTG 029-037	CS201908210_109			Trygve Bakken	10.1038/s41586-019-1506-7	middle temporal gyrus	UBERON:0002771	CCN201908210	Human	RNAseq
	MTG 029-034	CS201908210_110			Trygve Bakken	10.1038/s41586-019-1506-7	middle temporal gyrus	UBERON:0002771	CCN201908210	Human	RNAseq
	MTG 030-034	CS201908210_111			Trygve Bakken	10.1038/s41586-019-1506-7	middle temporal gyrus	UBERON:0002771	CCN201908210	Human	RNAseq
	MTG 030-033	CS201908210_112			Trygve Bakken	10.1038/s41586-019-1506-7	middle temporal gyrus	UBERON:0002771	CCN201908210	Human	RNAseq
	MTG 030-031	CS201908210_113			Trygve Bakken	10.1038/s41586-019-1506-7	middle temporal gyrus	UBERON:0002771	CCN201908210	Human	RNAseq
	MTG 032-033	CS201908210_114			Trygve Bakken	10.1038/s41586-019-1506-7	middle temporal gyrus	UBERON:0002771	CCN201908210	Human	RNAseq
	MTG 035-037	CS201908210_115			Trygve Bakken	10.1038/s41586-019-1506-7	middle temporal gyrus	UBERON:0002771	CCN201908210	Human	RNAseq
	MTG 035-036	CS201908210_116			Trygve Bakken	10.1038/s41586-019-1506-7	middle temporal gyrus	UBERON:0002771	CCN201908210	Human	RNAseq
PVALB	MTG 039-044	CS201908210_117		Basket	Trygve Bakken||Nathan Gouwens	10.1038/s41586-019-1506-7||10.1101/2020.02.03.932244	middle temporal gyrus	UBERON:0002771	CCN201908210	Human	RNAseq
	MTG 040-044	CS201908210_118			Trygve Bakken	10.1038/s41586-019-1506-7	middle temporal gyrus	UBERON:0002771	CCN201908210	Human	RNAseq
	MTG 041-044	CS201908210_119			Trygve Bakken	10.1038/s41586-019-1506-7	middle temporal gyrus	UBERON:0002771	CCN201908210	Human	RNAseq
	MTG 041-043	CS201908210_120			Trygve Bakken	10.1038/s41586-019-1506-7	middle temporal gyrus	UBERON:0002771	CCN201908210	Human	RNAseq
	MTG 042-043	CS201908210_121			Trygve Bakken	10.1038/s41586-019-1506-7	middle temporal gyrus	UBERON:0002771	CCN201908210	Human	RNAseq
Excitatory	MTG 046-069	CS201908210_122			Trygve Bakken	10.1038/s41586-019-1506-7	middle temporal gyrus	UBERON:0002771	CCN201908210	Human	RNAseq
	MTG 046-063	CS201908210_123			Trygve Bakken	10.1038/s41586-019-1506-7	middle temporal gyrus	UBERON:0002771	CCN201908210	Human	RNAseq
	MTG 046-060	CS201908210_124			Trygve Bakken	10.1038/s41586-019-1506-7	middle temporal gyrus	UBERON:0002771	CCN201908210	Human	RNAseq
	MTG 046-059	CS201908210_125			Trygve Bakken	10.1038/s41586-019-1506-7	middle temporal gyrus	UBERON:0002771	CCN201908210	Human	RNAseq
	MTG 046-049	CS201908210_126			Trygve Bakken	10.1038/s41586-019-1506-7	middle temporal gyrus	UBERON:0002771	CCN201908210	Human	RNAseq
L2/3	MTG 046-048	CS201908210_127	L2/3 IT		Trygve Bakken|Bosiljka Tasic	10.1038/s41586-019-1506-7|10.1038/s41586-018-0654-5	middle temporal gyrus	UBERON:0002771	CCN201908210	Human	RNAseq
	MTG 046-047	CS201908210_128			Trygve Bakken	10.1038/s41586-019-1506-7	middle temporal gyrus	UBERON:0002771	CCN201908210	Human	RNAseq
RORB	MTG 050-059	CS201908210_129			Trygve Bakken	10.1038/s41586-019-1506-7	middle temporal gyrus	UBERON:0002771	CCN201908210	Human	RNAseq
L4	MTG 050-054	CS201908210_130	L4		Trygve Bakken	10.1038/s41586-019-1506-7	middle temporal gyrus	UBERON:0002771	CCN201908210	Human	RNAseq
	MTG 051-054	CS201908210_131			Trygve Bakken	10.1038/s41586-019-1506-7	middle temporal gyrus	UBERON:0002771	CCN201908210	Human	RNAseq
	MTG 052-054	CS201908210_132			Trygve Bakken	10.1038/s41586-019-1506-7	middle temporal gyrus	UBERON:0002771	CCN201908210	Human	RNAseq
	MTG 053-054	CS201908210_133			Trygve Bakken	10.1038/s41586-019-1506-7	middle temporal gyrus	UBERON:0002771	CCN201908210	Human	RNAseq
	MTG 055-059	CS201908210_134	L5 IT		Trygve Bakken|Bosiljka Tasic	10.1038/s41586-019-1506-7|10.1038/s41586-018-0654-5	middle temporal gyrus	UBERON:0002771	CCN201908210	Human	RNAseq
	MTG 055-057	CS201908210_135			Trygve Bakken	10.1038/s41586-019-1506-7	middle temporal gyrus	UBERON:0002771	CCN201908210	Human	RNAseq
	MTG 056-057	CS201908210_136			Trygve Bakken	10.1038/s41586-019-1506-7	middle temporal gyrus	UBERON:0002771	CCN201908210	Human	RNAseq
	MTG 058-059	CS201908210_137			Trygve Bakken	10.1038/s41586-019-1506-7	middle temporal gyrus	UBERON:0002771	CCN201908210	Human	RNAseq
L6	MTG 061-063	CS201908210_138			Trygve Bakken	10.1038/s41586-019-1506-7	middle temporal gyrus	UBERON:0002771	CCN201908210	Human	RNAseq
	MTG 062-063	CS201908210_139			Trygve Bakken	10.1038/s41586-019-1506-7	middle temporal gyrus	UBERON:0002771	CCN201908210	Human	RNAseq
FEZF2	MTG 064-069	CS201908210_140			Trygve Bakken	10.1038/s41586-019-1506-7	middle temporal gyrus	UBERON:0002771	CCN201908210	Human	RNAseq
L6	MTG 065-069	CS201908210_141			Trygve Bakken	10.1038/s41586-019-1506-7	middle temporal gyrus	UBERON:0002771	CCN201908210	Human	RNAseq
	MTG 066-069	CS201908210_142	L6b		Trygve Bakken	10.1038/s41586-019-1506-7	middle temporal gyrus	UBERON:0002771	CCN201908210	Human	RNAseq
	MTG 066-068	CS201908210_143			Trygve Bakken	10.1038/s41586-019-1506-7	middle temporal gyrus	UBERON:0002771	CCN201908210	Human	RNAseq
	MTG 066-067	CS201908210_144			Trygve Bakken	10.1038/s41586-019-1506-7	middle temporal gyrus	UBERON:0002771	CCN201908210	Human	RNAseq
Non-neuronal	MTG 070-075	CS201908210_145	Non-neuronal		Trygve Bakken	10.1038/s41586-019-1506-7	middle temporal gyrus	UBERON:0002771	CCN201908210	Human	RNAseq
	MTG 070-074	CS201908210_146			Trygve Bakken	10.1038/s41586-019-1506-7	middle temporal gyrus	UBERON:0002771	CCN201908210	Human	RNAseq
	MTG 070-073	CS201908210_147			Trygve Bakken	10.1038/s41586-019-1506-7	middle temporal gyrus	UBERON:0002771	CCN201908210	Human	RNAseq
	MTG 070-072	CS201908210_148			Trygve Bakken	10.1038/s41586-019-1506-7	middle temporal gyrus	UBERON:0002771	CCN201908210	Human	RNAseq
	MTG 071-072	CS201908210_149	Astro		Trygve Bakken	10.1038/s41586-019-1506-7	middle temporal gyrus	UBERON:0002771	CCN201908210	Human	RNAseq
	MTG 003-008	CS201908210_150	Lamp5		Trygve Bakken	10.1038/s41586-019-1506-7	middle temporal gyrus	UBERON:0002771	CCN201908210	Human	RNAseq
	MTG 010-011	CS201908210_151	Sncg		Trygve Bakken	10.1038/s41586-019-1506-7	middle temporal gyrus	UBERON:0002771	CCN201908210	Human	RNAseq
	MTG 039-045	CS201908210_152	Pvalb	Fast spiking	Trygve Bakken|Trygve Bakken|Nathan Gouwens	10.1038/s41586-019-1506-7|10.1038/s41586-019-1506-7|10.1101/2020.02.03.932244	middle temporal gyrus	UBERON:0002771	CCN201908210	Human	RNAseq
	MTG 049, 061-063	CS201908210_153	L6 IT		Trygve Bakken|Bosiljka Tasic	10.1038/s41586-019-1506-7|10.1038/s41586-018-0654-5	middle temporal gyrus	UBERON:0002771	CCN201908210	Human	RNAseq
Neurosurgical	Metadata 1	CS201908210_154			Trygve Bakken	10.1038/s41586-019-1506-7	middle temporal gyrus	UBERON:0002771	CCN201908210	Human	RNAseq
L2/3 IT VISp Rrad	VISp_ALM 001	CS201810310_1			Bosiljka Tasic	10.1038/s41586-018-0654-5	primary visual cortex	UBERON_0002436	CCN201810310	Mouse	RNAseq
L2/3 IT VISp Adamts2	VISp_ALM 002	CS201810310_2			Bosiljka Tasic	10.1038/s41586-018-0654-5	primary visual cortex	UBERON_0002436	CCN201810310	Mouse	RNAseq
L2/3 IT VISp Agmat	VISp_ALM 003	CS201810310_3			Bosiljka Tasic	10.1038/s41586-018-0654-5	primary visual cortex	UBERON_0002436	CCN201810310	Mouse	RNAseq
L2/3 IT ALM Sla	VISp_ALM 004	CS201810310_4			Bosiljka Tasic	10.1038/s41586-018-0654-5	frontal cortex	UBERON_0001870	CCN201810310	Mouse	RNAseq
L2/3 IT ALM Ptrf	VISp_ALM 005	CS201810310_5			Bosiljka Tasic	10.1038/s41586-018-0654-5	frontal cortex	UBERON_0001870	CCN201810310	Mouse	RNAseq
L2/3 IT ALM Macc1 Lrg1	VISp_ALM 006	CS201810310_6			Bosiljka Tasic	10.1038/s41586-018-0654-5	frontal cortex	UBERON_0001870	CCN201810310	Mouse	RNAseq
L4 IT VISp Rspo1	VISp_ALM 007	CS201810310_7	L4		Bosiljka Tasic	10.1038/s41586-018-0654-5	primary visual cortex	UBERON_0002436	CCN201810310	Mouse	RNAseq
L5 IT VISp Hsd11b1 Endou	VISp_ALM 008	CS201810310_8			Bosiljka Tasic	10.1038/s41586-018-0654-5	primary visual cortex	UBERON_0002436	CCN201810310	Mouse	RNAseq
L5 IT VISp Whrn Tox2	VISp_ALM 009	CS201810310_9			Bosiljka Tasic	10.1038/s41586-018-0654-5	primary visual cortex	UBERON_0002436	CCN201810310	Mouse	RNAseq
L5 IT VISp Batf3	VISp_ALM 010	CS201810310_10			Bosiljka Tasic	10.1038/s41586-018-0654-5	primary visual cortex	UBERON_0002436	CCN201810310	Mouse	RNAseq
L5 IT VISp Col6a1 Fezf2	VISp_ALM 011	CS201810310_11			Bosiljka Tasic	10.1038/s41586-018-0654-5	primary visual cortex	UBERON_0002436	CCN201810310	Mouse	RNAseq
L5 IT VISp Col27a1	VISp_ALM 012	CS201810310_12			Bosiljka Tasic	10.1038/s41586-018-0654-5	primary visual cortex	UBERON_0002436	CCN201810310	Mouse	RNAseq
L5 IT ALM Npw	VISp_ALM 013	CS201810310_13			Bosiljka Tasic	10.1038/s41586-018-0654-5	frontal cortex	UBERON_0001870	CCN201810310	Mouse	RNAseq
L5 IT ALM Pld5	VISp_ALM 014	CS201810310_14			Bosiljka Tasic	10.1038/s41586-018-0654-5	frontal cortex	UBERON_0001870	CCN201810310	Mouse	RNAseq
L5 IT ALM Cbln4 Fezf2	VISp_ALM 015	CS201810310_15			Bosiljka Tasic	10.1038/s41586-018-0654-5	frontal cortex	UBERON_0001870	CCN201810310	Mouse	RNAseq
L5 IT ALM Lypd1 Gpr88	VISp_ALM 016	CS201810310_16			Bosiljka Tasic	10.1038/s41586-018-0654-5	frontal cortex	UBERON_0001870	CCN201810310	Mouse	RNAseq
L5 IT ALM Tnc	VISp_ALM 017	CS201810310_17			Bosiljka Tasic	10.1038/s41586-018-0654-5	frontal cortex	UBERON_0001870	CCN201810310	Mouse	RNAseq
L5 IT ALM Tmem163 Dmrtb1	VISp_ALM 018	CS201810310_18			Bosiljka Tasic	10.1038/s41586-018-0654-5	frontal cortex	UBERON_0001870	CCN201810310	Mouse	RNAseq
L5 IT ALM Tmem163 Arhgap25	VISp_ALM 019	CS201810310_19			Bosiljka Tasic	10.1038/s41586-018-0654-5	frontal cortex	UBERON_0001870	CCN201810310	Mouse	RNAseq
L5 IT ALM Cpa6 Gpr88	VISp_ALM 020	CS201810310_20			Bosiljka Tasic	10.1038/s41586-018-0654-5	frontal cortex	UBERON_0001870	CCN201810310	Mouse	RNAseq
L5 IT ALM Gkn1 Pcdh19	VISp_ALM 021	CS201810310_21			Bosiljka Tasic	10.1038/s41586-018-0654-5	frontal cortex	UBERON_0001870	CCN201810310	Mouse	RNAseq
L6 IT ALM Tgfb1	VISp_ALM 022	CS201810310_22			Bosiljka Tasic	10.1038/s41586-018-0654-5	frontal cortex	UBERON_0001870	CCN201810310	Mouse	RNAseq
L6 IT ALM Oprk1	VISp_ALM 023	CS201810310_23			Bosiljka Tasic	10.1038/s41586-018-0654-5	frontal cortex	UBERON_0001870	CCN201810310	Mouse	RNAseq
L6 IT VISp Penk Col27a1	VISp_ALM 024	CS201810310_24			Bosiljka Tasic	10.1038/s41586-018-0654-5	primary visual cortex	UBERON_0002436	CCN201810310	Mouse	RNAseq
L6 IT VISp Penk Fst	VISp_ALM 025	CS201810310_25			Bosiljka Tasic	10.1038/s41586-018-0654-5	primary visual cortex	UBERON_0002436	CCN201810310	Mouse	RNAseq
L6 IT VISp Col23a1 Adamts2	VISp_ALM 026	CS201810310_26			Bosiljka Tasic	10.1038/s41586-018-0654-5	primary visual cortex	UBERON_0002436	CCN201810310	Mouse	RNAseq
L6 IT VISp Col18a1	VISp_ALM 027	CS201810310_27			Bosiljka Tasic	10.1038/s41586-018-0654-5	primary visual cortex	UBERON_0002436	CCN201810310	Mouse	RNAseq
L6 IT VISp Car3	VISp_ALM 028	CS201810310_28			Bosiljka Tasic	10.1038/s41586-018-0654-5	primary visual cortex	UBERON_0002436	CCN201810310	Mouse	RNAseq
L5 PT VISp Chrna6	VISp_ALM 029	CS201810310_29			Bosiljka Tasic	10.1038/s41586-018-0654-5	primary visual cortex	UBERON_0002436	CCN201810310	Mouse	RNAseq
L5 PT VISp Lgr5	VISp_ALM 030	CS201810310_30			Bosiljka Tasic	10.1038/s41586-018-0654-5	primary visual cortex	UBERON_0002436	CCN201810310	Mouse	RNAseq
L5 PT VISp C1ql2 Ptgfr	VISp_ALM 031	CS201810310_31			Bosiljka Tasic	10.1038/s41586-018-0654-5	primary visual cortex	UBERON_0002436	CCN201810310	Mouse	RNAseq
L5 PT VISp C1ql2 Cdh13	VISp_ALM 032	CS201810310_32			Bosiljka Tasic	10.1038/s41586-018-0654-5	primary visual cortex	UBERON_0002436	CCN201810310	Mouse	RNAseq
L5 PT VISp Krt80	VISp_ALM 033	CS201810310_33			Bosiljka Tasic	10.1038/s41586-018-0654-5	primary visual cortex	UBERON_0002436	CCN201810310	Mouse	RNAseq
L5 PT ALM Slco2a1	VISp_ALM 034	CS201810310_34			Bosiljka Tasic	10.1038/s41586-018-0654-5	frontal cortex	UBERON_0001870	CCN201810310	Mouse	RNAseq
L5 PT ALM Npsr1	VISp_ALM 035	CS201810310_35			Bosiljka Tasic	10.1038/s41586-018-0654-5	frontal cortex	UBERON_0001870	CCN201810310	Mouse	RNAseq
L5 PT ALM Hpgd	VISp_ALM 036	CS201810310_36			Bosiljka Tasic	10.1038/s41586-018-0654-5	frontal cortex	UBERON_0001870	CCN201810310	Mouse	RNAseq
L5 NP VISp Trhr Cpne7	VISp_ALM 037	CS201810310_37			Bosiljka Tasic	10.1038/s41586-018-0654-5	primary visual cortex	UBERON_0002436	CCN201810310	Mouse	RNAseq
L5 NP ALM Trhr Nefl	VISp_ALM 038	CS201810310_38			Bosiljka Tasic	10.1038/s41586-018-0654-5	frontal cortex	UBERON_0001870	CCN201810310	Mouse	RNAseq
L5 NP VISp Trhr Met	VISp_ALM 039	CS201810310_39			Bosiljka Tasic	10.1038/s41586-018-0654-5	primary visual cortex	UBERON_0002436	CCN201810310	Mouse	RNAseq
L6 NP ALM Trh	VISp_ALM 040	CS201810310_40			Bosiljka Tasic	10.1038/s41586-018-0654-5	frontal cortex	UBERON_0001870	CCN201810310	Mouse	RNAseq
L6 CT Nxph2 Sla	VISp_ALM 041	CS201810310_41			Bosiljka Tasic	10.1038/s41586-018-0654-5	neocortex	UBERON_0001950	CCN201810310	Mouse	RNAseq
L6 CT ALM Cpa6	VISp_ALM 042	CS201810310_42			Bosiljka Tasic	10.1038/s41586-018-0654-5	frontal cortex	UBERON_0001870	CCN201810310	Mouse	RNAseq
L6 CT VISp Krt80 Sla	VISp_ALM 043	CS201810310_43			Bosiljka Tasic	10.1038/s41586-018-0654-5	primary visual cortex	UBERON_0002436	CCN201810310	Mouse	RNAseq
L6 CT VISp Nxph2 Wls	VISp_ALM 044	CS201810310_44			Bosiljka Tasic	10.1038/s41586-018-0654-5	primary visual cortex	UBERON_0002436	CCN201810310	Mouse	RNAseq
L6 CT VISp Ctxn3 Brinp3	VISp_ALM 045	CS201810310_45			Bosiljka Tasic	10.1038/s41586-018-0654-5	primary visual cortex	UBERON_0002436	CCN201810310	Mouse	RNAseq
L6 CT VISp Ctxn3 Sla	VISp_ALM 046	CS201810310_46			Bosiljka Tasic	10.1038/s41586-018-0654-5	primary visual cortex	UBERON_0002436	CCN201810310	Mouse	RNAseq
L6 CT VISp Gpr139	VISp_ALM 047	CS201810310_47			Bosiljka Tasic	10.1038/s41586-018-0654-5	primary visual cortex	UBERON_0002436	CCN201810310	Mouse	RNAseq
L6b Col8a1 Rprm	VISp_ALM 048	CS201810310_48			Bosiljka Tasic	10.1038/s41586-018-0654-5	neocortex	UBERON_0001950	CCN201810310	Mouse	RNAseq
L6b VISp Mup5	VISp_ALM 049	CS201810310_49			Bosiljka Tasic	10.1038/s41586-018-0654-5	primary visual cortex	UBERON_0002436	CCN201810310	Mouse	RNAseq
L6b VISp Col8a1 Rxfp1	VISp_ALM 050	CS201810310_50			Bosiljka Tasic	10.1038/s41586-018-0654-5	primary visual cortex	UBERON_0002436	CCN201810310	Mouse	RNAseq
L6b ALM Olfr111 Spon1	VISp_ALM 051	CS201810310_51			Bosiljka Tasic	10.1038/s41586-018-0654-5	frontal cortex	UBERON_0001870	CCN201810310	Mouse	RNAseq
L6b ALM Olfr111 Nxph1	VISp_ALM 052	CS201810310_52			Bosiljka Tasic	10.1038/s41586-018-0654-5	frontal cortex	UBERON_0001870	CCN201810310	Mouse	RNAseq
L6b P2ry12	VISp_ALM 053	CS201810310_53			Bosiljka Tasic	10.1038/s41586-018-0654-5	neocortex	UBERON_0001950	CCN201810310	Mouse	RNAseq
L6b VISp Crh	VISp_ALM 054	CS201810310_54			Bosiljka Tasic	10.1038/s41586-018-0654-5	primary visual cortex	UBERON_0002436	CCN201810310	Mouse	RNAseq
L6b Hsd17b2	VISp_ALM 055	CS201810310_55			Bosiljka Tasic	10.1038/s41586-018-0654-5	neocortex	UBERON_0001950	CCN201810310	Mouse	RNAseq
Lamp5 Krt73	VISp_ALM 056	CS201810310_56			Bosiljka Tasic	10.1038/s41586-018-0654-5	neocortex	UBERON_0001950	CCN201810310	Mouse	RNAseq
Lamp5 Fam19a1 Pax6	VISp_ALM 057	CS201810310_57			Bosiljka Tasic	10.1038/s41586-018-0654-5	neocortex	UBERON_0001950	CCN201810310	Mouse	RNAseq
Lamp5 Fam19a1 Tmem182	VISp_ALM 058	CS201810310_58			Bosiljka Tasic	10.1038/s41586-018-0654-5	neocortex	UBERON_0001950	CCN201810310	Mouse	RNAseq
Lamp5 Ntn1 Npy2r	VISp_ALM 059	CS201810310_59			Bosiljka Tasic	10.1038/s41586-018-0654-5	neocortex	UBERON_0001950	CCN201810310	Mouse	RNAseq
Lamp5 Plch2 Dock5	VISp_ALM 060	CS201810310_60			Bosiljka Tasic	10.1038/s41586-018-0654-5	neocortex	UBERON_0001950	CCN201810310	Mouse	RNAseq
Lamp5 Lsp1	VISp_ALM 061	CS201810310_61		Lamp5 Rosehip	Bosiljka Tasic	10.1038/s41586-018-0654-5	neocortex	UBERON_0001950	CCN201810310	Mouse	RNAseq
Lamp5 Lhx6	VISp_ALM 062	CS201810310_62	Lamp5 Lhx6		Bosiljka Tasic	10.1038/s41586-018-0654-5	neocortex	UBERON_0001950	CCN201810310	Mouse	RNAseq
Sncg Slc17a8	VISp_ALM 063	CS201810310_63			Bosiljka Tasic	10.1038/s41586-018-0654-5	neocortex	UBERON_0001950	CCN201810310	Mouse	RNAseq
Sncg Vip Nptx2	VISp_ALM 064	CS201810310_64			Bosiljka Tasic	10.1038/s41586-018-0654-5	neocortex	UBERON_0001950	CCN201810310	Mouse	RNAseq
Sncg Gpr50	VISp_ALM 065	CS201810310_65			Bosiljka Tasic	10.1038/s41586-018-0654-5	neocortex	UBERON_0001950	CCN201810310	Mouse	RNAseq
Sncg Vip Itih5	VISp_ALM 066	CS201810310_66			Bosiljka Tasic	10.1038/s41586-018-0654-5	neocortex	UBERON_0001950	CCN201810310	Mouse	RNAseq
Serpinf1 Clrn1	VISp_ALM 067	CS201810310_67			Bosiljka Tasic	10.1038/s41586-018-0654-5	neocortex	UBERON_0001950	CCN201810310	Mouse	RNAseq
Serpinf1 Aqp5 Vip	VISp_ALM 068	CS201810310_68			Bosiljka Tasic	10.1038/s41586-018-0654-5	neocortex	UBERON_0001950	CCN201810310	Mouse	RNAseq
Vip Igfbp6 Car10	VISp_ALM 069	CS201810310_69			Bosiljka Tasic	10.1038/s41586-018-0654-5	neocortex	UBERON_0001950	CCN201810310	Mouse	RNAseq
Vip Igfbp6 Pltp	VISp_ALM 070	CS201810310_70			Bosiljka Tasic	10.1038/s41586-018-0654-5	neocortex	UBERON_0001950	CCN201810310	Mouse	RNAseq
Vip Lmo1 Fam159b	VISp_ALM 071	CS201810310_71			Bosiljka Tasic	10.1038/s41586-018-0654-5	neocortex	UBERON_0001950	CCN201810310	Mouse	RNAseq
Vip Lmo1 Myl1	VISp_ALM 072	CS201810310_72			Bosiljka Tasic	10.1038/s41586-018-0654-5	neocortex	UBERON_0001950	CCN201810310	Mouse	RNAseq
Vip Igfbp4 Mab21l1	VISp_ALM 073	CS201810310_73			Bosiljka Tasic	10.1038/s41586-018-0654-5	neocortex	UBERON_0001950	CCN201810310	Mouse	RNAseq
Vip Arhgap36 Hmcn1	VISp_ALM 074	CS201810310_74			Bosiljka Tasic	10.1038/s41586-018-0654-5	neocortex	UBERON_0001950	CCN201810310	Mouse	RNAseq
Vip Gpc3 Slc18a3	VISp_ALM 075	CS201810310_75			Bosiljka Tasic	10.1038/s41586-018-0654-5	neocortex	UBERON_0001950	CCN201810310	Mouse	RNAseq
Vip Ptprt Pkp2	VISp_ALM 076	CS201810310_76			Bosiljka Tasic	10.1038/s41586-018-0654-5	neocortex	UBERON_0001950	CCN201810310	Mouse	RNAseq
Vip Rspo4 Rxfp1 Chat	VISp_ALM 077	CS201810310_77			Bosiljka Tasic	10.1038/s41586-018-0654-5	neocortex	UBERON_0001950	CCN201810310	Mouse	RNAseq
Vip Lect1 Oxtr	VISp_ALM 078	CS201810310_78			Bosiljka Tasic	10.1038/s41586-018-0654-5	neocortex	UBERON_0001950	CCN201810310	Mouse	RNAseq
Vip Rspo1 Itga4	VISp_ALM 079	CS201810310_79			Bosiljka Tasic	10.1038/s41586-018-0654-5	neocortex	UBERON_0001950	CCN201810310	Mouse	RNAseq
Vip Chat Htr1f	VISp_ALM 080	CS201810310_80			Bosiljka Tasic	10.1038/s41586-018-0654-5	neocortex	UBERON_0001950	CCN201810310	Mouse	RNAseq
Vip Pygm C1ql1	VISp_ALM 081	CS201810310_81			Bosiljka Tasic	10.1038/s41586-018-0654-5	neocortex	UBERON_0001950	CCN201810310	Mouse	RNAseq
Vip Crispld2 Htr2c	VISp_ALM 082	CS201810310_82			Bosiljka Tasic	10.1038/s41586-018-0654-5	neocortex	UBERON_0001950	CCN201810310	Mouse	RNAseq
Vip Crispld2 Kcne4	VISp_ALM 083	CS201810310_83			Bosiljka Tasic	10.1038/s41586-018-0654-5	neocortex	UBERON_0001950	CCN201810310	Mouse	RNAseq
Vip Col15a1 Pde1a	VISp_ALM 084	CS201810310_84			Bosiljka Tasic	10.1038/s41586-018-0654-5	neocortex	UBERON_0001950	CCN201810310	Mouse	RNAseq
Sst Chodl	VISp_ALM 085	CS201810310_85	Sst Chodl		Bosiljka Tasic	10.1038/s41586-018-0654-5	neocortex	UBERON_0001950	CCN201810310	Mouse	RNAseq
Sst Mme Fam114a1	VISp_ALM 086	CS201810310_86			Bosiljka Tasic	10.1038/s41586-018-0654-5	neocortex	UBERON_0001950	CCN201810310	Mouse	RNAseq
Sst Tac1 Htr1d	VISp_ALM 087	CS201810310_87			Bosiljka Tasic	10.1038/s41586-018-0654-5	neocortex	UBERON_0001950	CCN201810310	Mouse	RNAseq
Sst Tac1 Tacr3	VISp_ALM 088	CS201810310_88			Bosiljka Tasic	10.1038/s41586-018-0654-5	neocortex	UBERON_0001950	CCN201810310	Mouse	RNAseq
Sst Calb2 Necab1	VISp_ALM 089	CS201810310_89			Bosiljka Tasic	10.1038/s41586-018-0654-5	neocortex	UBERON_0001950	CCN201810310	Mouse	RNAseq
Sst Calb2 Pdlim5	VISp_ALM 090	CS201810310_90			Bosiljka Tasic	10.1038/s41586-018-0654-5	neocortex	UBERON_0001950	CCN201810310	Mouse	RNAseq
Sst Nr2f2 Necab1	VISp_ALM 091	CS201810310_91			Bosiljka Tasic	10.1038/s41586-018-0654-5	neocortex	UBERON_0001950	CCN201810310	Mouse	RNAseq
Sst Myh8 Etv1	VISp_ALM 092	CS201810310_92			Bosiljka Tasic	10.1038/s41586-018-0654-5	neocortex	UBERON_0001950	CCN201810310	Mouse	RNAseq
Sst Chrna2 Glra3	VISp_ALM 093	CS201810310_93			Bosiljka Tasic	10.1038/s41586-018-0654-5	neocortex	UBERON_0001950	CCN201810310	Mouse	RNAseq
Sst Myh8 Fibin	VISp_ALM 094	CS201810310_94			Bosiljka Tasic	10.1038/s41586-018-0654-5	neocortex	UBERON_0001950	CCN201810310	Mouse	RNAseq
Sst Chrna2 Ptgdr	VISp_ALM 095	CS201810310_95			Bosiljka Tasic	10.1038/s41586-018-0654-5	neocortex	UBERON_0001950	CCN201810310	Mouse	RNAseq
Sst Tac2 Myh4	VISp_ALM 096	CS201810310_96			Bosiljka Tasic	10.1038/s41586-018-0654-5	neocortex	UBERON_0001950	CCN201810310	Mouse	RNAseq
Sst Hpse Sema3c	VISp_ALM 097	CS201810310_97			Bosiljka Tasic	10.1038/s41586-018-0654-5	neocortex	UBERON_0001950	CCN201810310	Mouse	RNAseq
Sst Hpse Cbln4	VISp_ALM 098	CS201810310_98			Bosiljka Tasic	10.1038/s41586-018-0654-5	neocortex	UBERON_0001950	CCN201810310	Mouse	RNAseq
Sst Crhr2 Efemp1	VISp_ALM 099	CS201810310_99			Bosiljka Tasic	10.1038/s41586-018-0654-5	neocortex	UBERON_0001950	CCN201810310	Mouse	RNAseq
Sst Crh 4930553C11Rik	VISp_ALM 100	CS201810310_100			Bosiljka Tasic	10.1038/s41586-018-0654-5	neocortex	UBERON_0001950	CCN201810310	Mouse	RNAseq
Sst Esm1	VISp_ALM 101	CS201810310_101			Bosiljka Tasic	10.1038/s41586-018-0654-5	neocortex	UBERON_0001950	CCN201810310	Mouse	RNAseq
Sst Tac2 Tacstd2	VISp_ALM 102	CS201810310_102			Bosiljka Tasic	10.1038/s41586-018-0654-5	neocortex	UBERON_0001950	CCN201810310	Mouse	RNAseq
Sst Rxfp1 Eya1	VISp_ALM 103	CS201810310_103			Bosiljka Tasic	10.1038/s41586-018-0654-5	neocortex	UBERON_0001950	CCN201810310	Mouse	RNAseq
Sst Rxfp1 Prdm8	VISp_ALM 104	CS201810310_104			Bosiljka Tasic	10.1038/s41586-018-0654-5	neocortex	UBERON_0001950	CCN201810310	Mouse	RNAseq
Sst Nts	VISp_ALM 105	CS201810310_105			Bosiljka Tasic	10.1038/s41586-018-0654-5	neocortex	UBERON_0001950	CCN201810310	Mouse	RNAseq
Pvalb Gabrg1	VISp_ALM 106	CS201810310_106			Bosiljka Tasic	10.1038/s41586-018-0654-5	neocortex	UBERON_0001950	CCN201810310	Mouse	RNAseq
Pvalb Th Sst	VISp_ALM 107	CS201810310_107			Bosiljka Tasic	10.1038/s41586-018-0654-5	neocortex	UBERON_0001950	CCN201810310	Mouse	RNAseq
Pvalb Calb1 Sst	VISp_ALM 108	CS201810310_108			Bosiljka Tasic	10.1038/s41586-018-0654-5	neocortex	UBERON_0001950	CCN201810310	Mouse	RNAseq
Pvalb Akr1c18 Ntf3	VISp_ALM 109	CS201810310_109			Bosiljka Tasic	10.1038/s41586-018-0654-5	neocortex	UBERON_0001950	CCN201810310	Mouse	RNAseq
Pvalb Sema3e Kank4	VISp_ALM 110	CS201810310_110			Bosiljka Tasic	10.1038/s41586-018-0654-5	neocortex	UBERON_0001950	CCN201810310	Mouse	RNAseq
Pvalb Gpr149 Islr	VISp_ALM 111	CS201810310_111			Bosiljka Tasic	10.1038/s41586-018-0654-5	neocortex	UBERON_0001950	CCN201810310	Mouse	RNAseq
Pvalb Reln Itm2a	VISp_ALM 112	CS201810310_112			Bosiljka Tasic	10.1038/s41586-018-0654-5	neocortex	UBERON_0001950	CCN201810310	Mouse	RNAseq
Pvalb Reln Tac1	VISp_ALM 113	CS201810310_113			Bosiljka Tasic	10.1038/s41586-018-0654-5	neocortex	UBERON_0001950	CCN201810310	Mouse	RNAseq
Pvalb Tpbg	VISp_ALM 114	CS201810310_114			Bosiljka Tasic	10.1038/s41586-018-0654-5	neocortex	UBERON_0001950	CCN201810310	Mouse	RNAseq
Pvalb Vipr2	VISp_ALM 115	CS201810310_115	Chandelier		Bosiljka Tasic	10.1038/s41586-018-0654-5	neocortex	UBERON_0001950	CCN201810310	Mouse	RNAseq
Meis2 Adamts19	VISp_ALM 116	CS201810310_116	Meis2		Bosiljka Tasic	10.1038/s41586-018-0654-5	neocortex	UBERON_0001950	CCN201810310	Mouse	RNAseq
CR Lhx5	VISp_ALM 117	CS201810310_117		Cajal Retzius	Bosiljka Tasic	10.1038/s41586-018-0654-5	neocortex	UBERON_0001950	CCN201810310	Mouse	RNAseq
Astro Aqp4	VISp_ALM 118	CS201810310_118	Astrocyte		Bosiljka Tasic	10.1038/s41586-018-0654-5	neocortex	UBERON_0001950	CCN201810310	Mouse	RNAseq
OPC Pdgfra Grm5	VISp_ALM 119	CS201810310_119			Bosiljka Tasic	10.1038/s41586-018-0654-5	neocortex	UBERON_0001950	CCN201810310	Mouse	RNAseq
OPC Pdgfra Ccnb1	VISp_ALM 120	CS201810310_120			Bosiljka Tasic	10.1038/s41586-018-0654-5	neocortex	UBERON_0001950	CCN201810310	Mouse	RNAseq
Oligo Rassf10	VISp_ALM 121	CS201810310_121			Bosiljka Tasic	10.1038/s41586-018-0654-5	neocortex	UBERON_0001950	CCN201810310	Mouse	RNAseq
Oligo Serpinb1a	VISp_ALM 122	CS201810310_122			Bosiljka Tasic	10.1038/s41586-018-0654-5	neocortex	UBERON_0001950	CCN201810310	Mouse	RNAseq
Oligo Synpr	VISp_ALM 123	CS201810310_123			Bosiljka Tasic	10.1038/s41586-018-0654-5	neocortex	UBERON_0001950	CCN201810310	Mouse	RNAseq
VLMC Osr1 Cd74	VISp_ALM 124	CS201810310_124			Bosiljka Tasic	10.1038/s41586-018-0654-5	neocortex	UBERON_0001950	CCN201810310	Mouse	RNAseq
VLMC Spp1 Hs3st6	VISp_ALM 125	CS201810310_125			Bosiljka Tasic	10.1038/s41586-018-0654-5	neocortex	UBERON_0001950	CCN201810310	Mouse	RNAseq
VLMC Osr1 Mc5r	VISp_ALM 126	CS201810310_126			Bosiljka Tasic	10.1038/s41586-018-0654-5	neocortex	UBERON_0001950	CCN201810310	Mouse	RNAseq
VLMC Spp1 Col15a1	VISp_ALM 127	CS201810310_127			Bosiljka Tasic	10.1038/s41586-018-0654-5	neocortex	UBERON_0001950	CCN201810310	Mouse	RNAseq
Peri Kcnj8	VISp_ALM 128	CS201810310_128	Pericyte		Bosiljka Tasic	10.1038/s41586-018-0654-5	neocortex	UBERON_0001950	CCN201810310	Mouse	RNAseq
SMC Acta2	VISp_ALM 129	CS201810310_129	SMC		Bosiljka Tasic	10.1038/s41586-018-0654-5	neocortex	UBERON_0001950	CCN201810310	Mouse	RNAseq
Endo Ctla2a	VISp_ALM 130	CS201810310_130			Bosiljka Tasic	10.1038/s41586-018-0654-5	neocortex	UBERON_0001950	CCN201810310	Mouse	RNAseq
Endo Cytl1	VISp_ALM 131	CS201810310_131			Bosiljka Tasic	10.1038/s41586-018-0654-5	neocortex	UBERON_0001950	CCN201810310	Mouse	RNAseq
PVM Mrc1	VISp_ALM 132	CS201810310_132	PVM		Bosiljka Tasic	10.1038/s41586-018-0654-5	neocortex	UBERON_0001950	CCN201810310	Mouse	RNAseq
Microglia Siglech	VISp_ALM 133	CS201810310_133	Microglia		Bosiljka Tasic	10.1038/s41586-018-0654-5	neocortex	UBERON_0001950	CCN201810310	Mouse	RNAseq
	All cells	CS201810310_134			Bosiljka Tasic	10.1038/s41586-018-0654-5	neocortex	UBERON_0001950	CCN201810310	Mouse	RNAseq
	VISp_ALM 001-123	CS201810310_135			Bosiljka Tasic	10.1038/s41586-018-0654-5	neocortex	UBERON_0001950	CCN201810310	Mouse	RNAseq
Neuronal	VISp_ALM 001-117	CS201810310_136		Neuronal	Bosiljka Tasic	10.1038/s41586-018-0654-5	neocortex	UBERON_0001950	CCN201810310	Mouse	RNAseq
	VISp_ALM 001-115	CS201810310_137			Bosiljka Tasic	10.1038/s41586-018-0654-5	neocortex	UBERON_0001950	CCN201810310	Mouse	RNAseq
Glutamatergic	VISp_ALM 001-055	CS201810310_138	Glutamatergic		Bosiljka Tasic	10.1038/s41586-018-0654-5	neocortex	UBERON_0001950	CCN201810310	Mouse	RNAseq
	VISp_ALM 001-036	CS201810310_139			Bosiljka Tasic	10.1038/s41586-018-0654-5	neocortex	UBERON_0001950	CCN201810310	Mouse	RNAseq
	VISp_ALM 001-028	CS201810310_140			Bosiljka Tasic	10.1038/s41586-018-0654-5	neocortex	UBERON_0001950	CCN201810310	Mouse	RNAseq
	VISp_ALM 001-027	CS201810310_141			Bosiljka Tasic	10.1038/s41586-018-0654-5	neocortex	UBERON_0001950	CCN201810310	Mouse	RNAseq
L2/3 IT	VISp_ALM 001-006	CS201810310_142	L2/3 IT		Bosiljka Tasic	10.1038/s41586-018-0654-5	neocortex	UBERON_0001950	CCN201810310	Mouse	RNAseq
	VISp_ALM 001-003	CS201810310_143			Bosiljka Tasic	10.1038/s41586-018-0654-5	neocortex	UBERON_0001950	CCN201810310	Mouse	RNAseq
	VISp_ALM 002-003	CS201810310_144			Bosiljka Tasic	10.1038/s41586-018-0654-5	neocortex	UBERON_0001950	CCN201810310	Mouse	RNAseq
	VISp_ALM 004-006	CS201810310_145			Bosiljka Tasic	10.1038/s41586-018-0654-5	neocortex	UBERON_0001950	CCN201810310	Mouse	RNAseq
	VISp_ALM 004-005	CS201810310_146			Bosiljka Tasic	10.1038/s41586-018-0654-5	neocortex	UBERON_0001950	CCN201810310	Mouse	RNAseq
L5 IT (VISp)	VISp_ALM 008-012	CS201810310_147	L5 IT	L5 IT (VISp)	Bosiljka Tasic	10.1038/s41586-018-0654-5	primary visual cortex	UBERON_0002436	CCN201810310	Mouse	RNAseq
	VISp_ALM 008-010	CS201810310_148			Bosiljka Tasic	10.1038/s41586-018-0654-5	neocortex	UBERON_0001950	CCN201810310	Mouse	RNAseq
	VISp_ALM 008-009	CS201810310_149			Bosiljka Tasic	10.1038/s41586-018-0654-5	neocortex	UBERON_0001950	CCN201810310	Mouse	RNAseq
	VISp_ALM 011-012	CS201810310_150			Bosiljka Tasic	10.1038/s41586-018-0654-5	neocortex	UBERON_0001950	CCN201810310	Mouse	RNAseq
L5 IT (ALM)	VISp_ALM 013-018	CS201810310_151	L5 IT	L5 IT (ALM)	Bosiljka Tasic	10.1038/s41586-018-0654-5	frontal cortex	UBERON_0001870	CCN201810310	Mouse	RNAseq
	VISp_ALM 013-014	CS201810310_152			Bosiljka Tasic	10.1038/s41586-018-0654-5	neocortex	UBERON_0001950	CCN201810310	Mouse	RNAseq
	VISp_ALM 015-018	CS201810310_153			Bosiljka Tasic	10.1038/s41586-018-0654-5	neocortex	UBERON_0001950	CCN201810310	Mouse	RNAseq
	VISp_ALM 015-016	CS201810310_154			Bosiljka Tasic	10.1038/s41586-018-0654-5	neocortex	UBERON_0001950	CCN201810310	Mouse	RNAseq
	VISp_ALM 017-018	CS201810310_155			Bosiljka Tasic	10.1038/s41586-018-0654-5	neocortex	UBERON_0001950	CCN201810310	Mouse	RNAseq
L6 IT (ALM)	VISp_ALM 019-023	CS201810310_156	L6 IT	L6 IT (ALM)	Bosiljka Tasic	10.1038/s41586-018-0654-5	frontal cortex	UBERON_0001870	CCN201810310	Mouse	RNAseq
	VISp_ALM 019-021	CS201810310_157			Bosiljka Tasic	10.1038/s41586-018-0654-5	neocortex	UBERON_0001950	CCN201810310	Mouse	RNAseq
	VISp_ALM 020-021	CS201810310_158			Bosiljka Tasic	10.1038/s41586-018-0654-5	neocortex	UBERON_0001950	CCN201810310	Mouse	RNAseq
	VISp_ALM 022-023	CS201810310_159			Bosiljka Tasic	10.1038/s41586-018-0654-5	neocortex	UBERON_0001950	CCN201810310	Mouse	RNAseq
L6 IT (VISp)	VISp_ALM 024-027	CS201810310_160	L6 IT	L6 IT (VISp)	Bosiljka Tasic	10.1038/s41586-018-0654-5	primary visual cortex	UBERON_0002436	CCN201810310	Mouse	RNAseq
	VISp_ALM 024-026	CS201810310_161			Bosiljka Tasic	10.1038/s41586-018-0654-5	neocortex	UBERON_0001950	CCN201810310	Mouse	RNAseq
	VISp_ALM 025-026	CS201810310_162			Bosiljka Tasic	10.1038/s41586-018-0654-5	neocortex	UBERON_0001950	CCN201810310	Mouse	RNAseq
	VISp_ALM 029-036	CS201810310_163			Bosiljka Tasic	10.1038/s41586-018-0654-5	neocortex	UBERON_0001950	CCN201810310	Mouse	RNAseq
L5 PT	VISp_ALM 030-036	CS201810310_164	L5 ET	L5 PT	Bosiljka Tasic	10.1038/s41586-018-0654-5	neocortex	UBERON_0001950	CCN201810310	Mouse	RNAseq
	VISp_ALM 030-033	CS201810310_165			Bosiljka Tasic	10.1038/s41586-018-0654-5	neocortex	UBERON_0001950	CCN201810310	Mouse	RNAseq
	VISp_ALM 031-033	CS201810310_166			Bosiljka Tasic	10.1038/s41586-018-0654-5	neocortex	UBERON_0001950	CCN201810310	Mouse	RNAseq
	VISp_ALM 032-033	CS201810310_167			Bosiljka Tasic	10.1038/s41586-018-0654-5	neocortex	UBERON_0001950	CCN201810310	Mouse	RNAseq
	VISp_ALM 034-036	CS201810310_168			Bosiljka Tasic	10.1038/s41586-018-0654-5	neocortex	UBERON_0001950	CCN201810310	Mouse	RNAseq
	VISp_ALM 035-036	CS201810310_169			Bosiljka Tasic	10.1038/s41586-018-0654-5	neocortex	UBERON_0001950	CCN201810310	Mouse	RNAseq
	VISp_ALM 037-055	CS201810310_170			Bosiljka Tasic	10.1038/s41586-018-0654-5	neocortex	UBERON_0001950	CCN201810310	Mouse	RNAseq
L5/6 NP	VISp_ALM 037-040	CS201810310_171	L5/6 NP		Bosiljka Tasic	10.1038/s41586-018-0654-5	neocortex	UBERON_0001950	CCN201810310	Mouse	RNAseq
	VISp_ALM 037-039	CS201810310_172			Bosiljka Tasic	10.1038/s41586-018-0654-5	neocortex	UBERON_0001950	CCN201810310	Mouse	RNAseq
	VISp_ALM 038-039	CS201810310_173			Bosiljka Tasic	10.1038/s41586-018-0654-5	neocortex	UBERON_0001950	CCN201810310	Mouse	RNAseq
L6	VISp_ALM 041-055	CS201810310_174		L6	Bosiljka Tasic	10.1038/s41586-018-0654-5	neocortex	UBERON_0001950	CCN201810310	Mouse	RNAseq
L6 CT	VISp_ALM 041-047	CS201810310_175	L6 CT		Bosiljka Tasic	10.1038/s41586-018-0654-5	neocortex	UBERON_0001950	CCN201810310	Mouse	RNAseq
	VISp_ALM 041-046	CS201810310_176			Bosiljka Tasic	10.1038/s41586-018-0654-5	neocortex	UBERON_0001950	CCN201810310	Mouse	RNAseq
	VISp_ALM 041-043	CS201810310_177			Bosiljka Tasic	10.1038/s41586-018-0654-5	neocortex	UBERON_0001950	CCN201810310	Mouse	RNAseq
	VISp_ALM 042-043	CS201810310_178			Bosiljka Tasic	10.1038/s41586-018-0654-5	neocortex	UBERON_0001950	CCN201810310	Mouse	RNAseq
	VISp_ALM 044-046	CS201810310_179			Bosiljka Tasic	10.1038/s41586-018-0654-5	neocortex	UBERON_0001950	CCN201810310	Mouse	RNAseq
	VISp_ALM 045-046	CS201810310_180			Bosiljka Tasic	10.1038/s41586-018-0654-5	neocortex	UBERON_0001950	CCN201810310	Mouse	RNAseq
L6b	VISp_ALM 048-055	CS201810310_181	L6b		Bosiljka Tasic	10.1038/s41586-018-0654-5	neocortex	UBERON_0001950	CCN201810310	Mouse	RNAseq
	VISp_ALM 048-054	CS201810310_182			Bosiljka Tasic	10.1038/s41586-018-0654-5	neocortex	UBERON_0001950	CCN201810310	Mouse	RNAseq
	VISp_ALM 048-050	CS201810310_183			Bosiljka Tasic	10.1038/s41586-018-0654-5	neocortex	UBERON_0001950	CCN201810310	Mouse	RNAseq
	VISp_ALM 049-050	CS201810310_184			Bosiljka Tasic	10.1038/s41586-018-0654-5	neocortex	UBERON_0001950	CCN201810310	Mouse	RNAseq
	VISp_ALM 051-054	CS201810310_185			Bosiljka Tasic	10.1038/s41586-018-0654-5	neocortex	UBERON_0001950	CCN201810310	Mouse	RNAseq
	VISp_ALM 051-052	CS201810310_186			Bosiljka Tasic	10.1038/s41586-018-0654-5	neocortex	UBERON_0001950	CCN201810310	Mouse	RNAseq
GABAergic	VISp_ALM 056-115	CS201810310_187	GABAergic		Bosiljka Tasic	10.1038/s41586-018-0654-5	neocortex	UBERON_0001950	CCN201810310	Mouse	RNAseq
	VISp_ALM 056-084	CS201810310_188			Bosiljka Tasic	10.1038/s41586-018-0654-5	neocortex	UBERON_0001950	CCN201810310	Mouse	RNAseq
	VISp_ALM 056-068	CS201810310_189			Bosiljka Tasic	10.1038/s41586-018-0654-5	neocortex	UBERON_0001950	CCN201810310	Mouse	RNAseq
Lamp5	VISp_ALM 056-062	CS201810310_190	Lamp5		Bosiljka Tasic	10.1038/s41586-018-0654-5	neocortex	UBERON_0001950	CCN201810310	Mouse	RNAseq
	VISp_ALM 056-060	CS201810310_191			Bosiljka Tasic	10.1038/s41586-018-0654-5	neocortex	UBERON_0001950	CCN201810310	Mouse	RNAseq
	VISp_ALM 057-060	CS201810310_192			Bosiljka Tasic	10.1038/s41586-018-0654-5	neocortex	UBERON_0001950	CCN201810310	Mouse	RNAseq
	VISp_ALM 057-058	CS201810310_193			Bosiljka Tasic	10.1038/s41586-018-0654-5	neocortex	UBERON_0001950	CCN201810310	Mouse	RNAseq
	VISp_ALM 059-060	CS201810310_194			Bosiljka Tasic	10.1038/s41586-018-0654-5	neocortex	UBERON_0001950	CCN201810310	Mouse	RNAseq
	VISp_ALM 061-062	CS201810310_195			Bosiljka Tasic	10.1038/s41586-018-0654-5	neocortex	UBERON_0001950	CCN201810310	Mouse	RNAseq
	VISp_ALM 063-068	CS201810310_196			Bosiljka Tasic	10.1038/s41586-018-0654-5	neocortex	UBERON_0001950	CCN201810310	Mouse	RNAseq
Sncg	VISp_ALM 063-066	CS201810310_197	Sncg		Bosiljka Tasic	10.1038/s41586-018-0654-5	neocortex	UBERON_0001950	CCN201810310	Mouse	RNAseq
	VISp_ALM 064-066	CS201810310_198			Bosiljka Tasic	10.1038/s41586-018-0654-5	neocortex	UBERON_0001950	CCN201810310	Mouse	RNAseq
	VISp_ALM 064-065	CS201810310_199			Bosiljka Tasic	10.1038/s41586-018-0654-5	neocortex	UBERON_0001950	CCN201810310	Mouse	RNAseq
Serpinf1	VISp_ALM 067-068	CS201810310_200		Serpinf1	Bosiljka Tasic	10.1038/s41586-018-0654-5	neocortex	UBERON_0001950	CCN201810310	Mouse	RNAseq
Vip	VISp_ALM 069-084	CS201810310_201	Vip		Bosiljka Tasic	10.1038/s41586-018-0654-5	neocortex	UBERON_0001950	CCN201810310	Mouse	RNAseq
	VISp_ALM 069-070	CS201810310_202			Bosiljka Tasic	10.1038/s41586-018-0654-5	neocortex	UBERON_0001950	CCN201810310	Mouse	RNAseq
	VISp_ALM 071-084	CS201810310_203			Bosiljka Tasic	10.1038/s41586-018-0654-5	neocortex	UBERON_0001950	CCN201810310	Mouse	RNAseq
	VISp_ALM 071-081	CS201810310_204			Bosiljka Tasic	10.1038/s41586-018-0654-5	neocortex	UBERON_0001950	CCN201810310	Mouse	RNAseq
	VISp_ALM 071-072	CS201810310_205			Bosiljka Tasic	10.1038/s41586-018-0654-5	neocortex	UBERON_0001950	CCN201810310	Mouse	RNAseq
	VISp_ALM 073-081	CS201810310_206			Bosiljka Tasic	10.1038/s41586-018-0654-5	neocortex	UBERON_0001950	CCN201810310	Mouse	RNAseq
	VISp_ALM 073-075	CS201810310_207			Bosiljka Tasic	10.1038/s41586-018-0654-5	neocortex	UBERON_0001950	CCN201810310	Mouse	RNAseq
	VISp_ALM 074-075	CS201810310_208			Bosiljka Tasic	10.1038/s41586-018-0654-5	neocortex	UBERON_0001950	CCN201810310	Mouse	RNAseq
	VISp_ALM 076-081	CS201810310_209			Bosiljka Tasic	10.1038/s41586-018-0654-5	neocortex	UBERON_0001950	CCN201810310	Mouse	RNAseq
	VISp_ALM 076-079	CS201810310_210			Bosiljka Tasic	10.1038/s41586-018-0654-5	neocortex	UBERON_0001950	CCN201810310	Mouse	RNAseq
	VISp_ALM 076-077	CS201810310_211			Bosiljka Tasic	10.1038/s41586-018-0654-5	neocortex	UBERON_0001950	CCN201810310	Mouse	RNAseq
	VISp_ALM 078-079	CS201810310_212			Bosiljka Tasic	10.1038/s41586-018-0654-5	neocortex	UBERON_0001950	CCN201810310	Mouse	RNAseq
	VISp_ALM 080-081	CS201810310_213			Bosiljka Tasic	10.1038/s41586-018-0654-5	neocortex	UBERON_0001950	CCN201810310	Mouse	RNAseq
	VISp_ALM 082-084	CS201810310_214			Bosiljka Tasic	10.1038/s41586-018-0654-5	neocortex	UBERON_0001950	CCN201810310	Mouse	RNAseq
	VISp_ALM 082-083	CS201810310_215			Bosiljka Tasic	10.1038/s41586-018-0654-5	neocortex	UBERON_0001950	CCN201810310	Mouse	RNAseq
	VISp_ALM 085-115	CS201810310_216			Bosiljka Tasic	10.1038/s41586-018-0654-5	neocortex	UBERON_0001950	CCN201810310	Mouse	RNAseq
	VISp_ALM 086-115	CS201810310_217			Bosiljka Tasic	10.1038/s41586-018-0654-5	neocortex	UBERON_0001950	CCN201810310	Mouse	RNAseq
Sst	VISp_ALM 086-105	CS201810310_218	Sst		Bosiljka Tasic	10.1038/s41586-018-0654-5	neocortex	UBERON_0001950	CCN201810310	Mouse	RNAseq
	VISp_ALM 086-104	CS201810310_219			Bosiljka Tasic	10.1038/s41586-018-0654-5	neocortex	UBERON_0001950	CCN201810310	Mouse	RNAseq
	VISp_ALM 086-087	CS201810310_220			Bosiljka Tasic	10.1038/s41586-018-0654-5	neocortex	UBERON_0001950	CCN201810310	Mouse	RNAseq
	VISp_ALM 089-090	CS201810310_221			Bosiljka Tasic	10.1038/s41586-018-0654-5	neocortex	UBERON_0001950	CCN201810310	Mouse	RNAseq
	VISp_ALM 092-094	CS201810310_222			Bosiljka Tasic	10.1038/s41586-018-0654-5	neocortex	UBERON_0001950	CCN201810310	Mouse	RNAseq
	VISp_ALM 092-093	CS201810310_223			Bosiljka Tasic	10.1038/s41586-018-0654-5	neocortex	UBERON_0001950	CCN201810310	Mouse	RNAseq
	VISp_ALM 095-096	CS201810310_224			Bosiljka Tasic	10.1038/s41586-018-0654-5	neocortex	UBERON_0001950	CCN201810310	Mouse	RNAseq
	VISp_ALM 097-098	CS201810310_225			Bosiljka Tasic	10.1038/s41586-018-0654-5	neocortex	UBERON_0001950	CCN201810310	Mouse	RNAseq
	VISp_ALM 099-101	CS201810310_226			Bosiljka Tasic	10.1038/s41586-018-0654-5	neocortex	UBERON_0001950	CCN201810310	Mouse	RNAseq
	VISp_ALM 099-100	CS201810310_227			Bosiljka Tasic	10.1038/s41586-018-0654-5	neocortex	UBERON_0001950	CCN201810310	Mouse	RNAseq
	VISp_ALM 102-104	CS201810310_228			Bosiljka Tasic	10.1038/s41586-018-0654-5	neocortex	UBERON_0001950	CCN201810310	Mouse	RNAseq
	VISp_ALM 103-104	CS201810310_229			Bosiljka Tasic	10.1038/s41586-018-0654-5	neocortex	UBERON_0001950	CCN201810310	Mouse	RNAseq
Pvalb	VISp_ALM 106-115	CS201810310_230	Pvalb		Bosiljka Tasic	10.1038/s41586-018-0654-5	neocortex	UBERON_0001950	CCN201810310	Mouse	RNAseq
	VISp_ALM 106-114	CS201810310_231			Bosiljka Tasic	10.1038/s41586-018-0654-5	neocortex	UBERON_0001950	CCN201810310	Mouse	RNAseq
	VISp_ALM 106-107	CS201810310_232			Bosiljka Tasic	10.1038/s41586-018-0654-5	neocortex	UBERON_0001950	CCN201810310	Mouse	RNAseq
	VISp_ALM 108-114	CS201810310_233			Bosiljka Tasic	10.1038/s41586-018-0654-5	neocortex	UBERON_0001950	CCN201810310	Mouse	RNAseq
	VISp_ALM 108-111	CS201810310_234			Bosiljka Tasic	10.1038/s41586-018-0654-5	neocortex	UBERON_0001950	CCN201810310	Mouse	RNAseq
	VISp_ALM 109-111	CS201810310_235			Bosiljka Tasic	10.1038/s41586-018-0654-5	neocortex	UBERON_0001950	CCN201810310	Mouse	RNAseq
	VISp_ALM 109-110	CS201810310_236			Bosiljka Tasic	10.1038/s41586-018-0654-5	neocortex	UBERON_0001950	CCN201810310	Mouse	RNAseq
	VISp_ALM 112-114	CS201810310_237			Bosiljka Tasic	10.1038/s41586-018-0654-5	neocortex	UBERON_0001950	CCN201810310	Mouse	RNAseq
	VISp_ALM 113-114	CS201810310_238			Bosiljka Tasic	10.1038/s41586-018-0654-5	neocortex	UBERON_0001950	CCN201810310	Mouse	RNAseq
	VISp_ALM 116-117	CS201810310_239			Bosiljka Tasic	10.1038/s41586-018-0654-5	neocortex	UBERON_0001950	CCN201810310	Mouse	RNAseq
	VISp_ALM 118-123	CS201810310_240			Bosiljka Tasic	10.1038/s41586-018-0654-5	neocortex	UBERON_0001950	CCN201810310	Mouse	RNAseq
	VISp_ALM 118-120	CS201810310_241			Bosiljka Tasic	10.1038/s41586-018-0654-5	neocortex	UBERON_0001950	CCN201810310	Mouse	RNAseq
OPC	VISp_ALM 119-120	CS201810310_242	OPC		Bosiljka Tasic	10.1038/s41586-018-0654-5	neocortex	UBERON_0001950	CCN201810310	Mouse	RNAseq
Oligodendrocyte	VISp_ALM 121-123	CS201810310_243	Oligodendrocyte		Bosiljka Tasic	10.1038/s41586-018-0654-5	neocortex	UBERON_0001950	CCN201810310	Mouse	RNAseq
	VISp_ALM 122-123	CS201810310_244			Bosiljka Tasic	10.1038/s41586-018-0654-5	neocortex	UBERON_0001950	CCN201810310	Mouse	RNAseq
	VISp_ALM 124-133	CS201810310_245			Bosiljka Tasic	10.1038/s41586-018-0654-5	neocortex	UBERON_0001950	CCN201810310	Mouse	RNAseq
	VISp_ALM 124-131	CS201810310_246			Bosiljka Tasic	10.1038/s41586-018-0654-5	neocortex	UBERON_0001950	CCN201810310	Mouse	RNAseq
	VISp_ALM 124-129	CS201810310_247			Bosiljka Tasic	10.1038/s41586-018-0654-5	neocortex	UBERON_0001950	CCN201810310	Mouse	RNAseq
VLMC	VISp_ALM 124-127	CS201810310_248	VLMC		Bosiljka Tasic	10.1038/s41586-018-0654-5	neocortex	UBERON_0001950	CCN201810310	Mouse	RNAseq
	VISp_ALM 125-127	CS201810310_249			Bosiljka Tasic	10.1038/s41586-018-0654-5	neocortex	UBERON_0001950	CCN201810310	Mouse	RNAseq
	VISp_ALM 126-127	CS201810310_250			Bosiljka Tasic	10.1038/s41586-018-0654-5	neocortex	UBERON_0001950	CCN201810310	Mouse	RNAseq
	VISp_ALM 128-129	CS201810310_251			Bosiljka Tasic	10.1038/s41586-018-0654-5	neocortex	UBERON_0001950	CCN201810310	Mouse	RNAseq
Endothelial	VISp_ALM 130-131	CS201810310_252	Endothelial		Bosiljka Tasic	10.1038/s41586-018-0654-5	neocortex	UBERON_0001950	CCN201810310	Mouse	RNAseq
Microglia-PVM	VISp_ALM 132-133	CS201810310_253	Microglia-PVM		Bosiljka Tasic	10.1038/s41586-018-0654-5	neocortex	UBERON_0001950	CCN201810310	Mouse	RNAseq
Lamp5 1	HM 001	CS201908211_1			Trygve Bakken	10.1038/s41586-019-1506-7	neocortex	UBERON_0001950	CCN201908211	Human|Mouse	RNAseq
Lamp5 Rosehip	HM 002	CS201908211_2		Lamp5 Rosehip	Trygve Bakken	10.1038/s41586-019-1506-7	neocortex	UBERON_0001950	CCN201908211	Human|Mouse	RNAseq
Lamp5 Lhx6	HM 003	CS201908211_3	Lamp5 Lhx6		Trygve Bakken	10.1038/s41586-019-1506-7	neocortex	UBERON_0001950	CCN201908211	Human|Mouse	RNAseq
Pax6	HM 004	CS201908211_4		Pax6	Trygve Bakken	10.1038/s41586-019-1506-7	neocortex	UBERON_0001950	CCN201908211	Human|Mouse	RNAseq
Lamp5 2	HM 005	CS201908211_5			Trygve Bakken	10.1038/s41586-019-1506-7	neocortex	UBERON_0001950	CCN201908211	Human|Mouse	RNAseq
Vip Sncg	HM 006	CS201908211_6	Sncg		Trygve Bakken	10.1038/s41586-019-1506-7	neocortex	UBERON_0001950	CCN201908211	Human|Mouse	RNAseq
Vip 1	HM 007	CS201908211_7			Trygve Bakken	10.1038/s41586-019-1506-7	neocortex	UBERON_0001950	CCN201908211	Human|Mouse	RNAseq
Vip 2	HM 008	CS201908211_8			Trygve Bakken	10.1038/s41586-019-1506-7	neocortex	UBERON_0001950	CCN201908211	Human|Mouse	RNAseq
Vip 3	HM 009	CS201908211_9			Trygve Bakken	10.1038/s41586-019-1506-7	neocortex	UBERON_0001950	CCN201908211	Human|Mouse	RNAseq
Vip 4	HM 010	CS201908211_10			Trygve Bakken	10.1038/s41586-019-1506-7	neocortex	UBERON_0001950	CCN201908211	Human|Mouse	RNAseq
Vip 5	HM 011	CS201908211_11			Trygve Bakken	10.1038/s41586-019-1506-7	neocortex	UBERON_0001950	CCN201908211	Human|Mouse	RNAseq
Sst Chodl	HM 012	CS201908211_12	Sst Chodl		Trygve Bakken	10.1038/s41586-019-1506-7	neocortex	UBERON_0001950	CCN201908211	Human|Mouse	RNAseq
Sst 2	HM 013	CS201908211_13			Trygve Bakken	10.1038/s41586-019-1506-7	neocortex	UBERON_0001950	CCN201908211	Human|Mouse	RNAseq
Sst 3	HM 014	CS201908211_14			Trygve Bakken	10.1038/s41586-019-1506-7	neocortex	UBERON_0001950	CCN201908211	Human|Mouse	RNAseq
Sst 1	HM 015	CS201908211_15			Trygve Bakken	10.1038/s41586-019-1506-7	neocortex	UBERON_0001950	CCN201908211	Human|Mouse	RNAseq
Sst 4	HM 016	CS201908211_16			Trygve Bakken	10.1038/s41586-019-1506-7	neocortex	UBERON_0001950	CCN201908211	Human|Mouse	RNAseq
Sst 5	HM 017	CS201908211_17			Trygve Bakken	10.1038/s41586-019-1506-7	neocortex	UBERON_0001950	CCN201908211	Human|Mouse	RNAseq
Pvalb 1	HM 018	CS201908211_18			Trygve Bakken	10.1038/s41586-019-1506-7	neocortex	UBERON_0001950	CCN201908211	Human|Mouse	RNAseq
Pvalb 2	HM 019	CS201908211_19			Trygve Bakken	10.1038/s41586-019-1506-7	neocortex	UBERON_0001950	CCN201908211	Human|Mouse	RNAseq
Chandelier	HM 020	CS201908211_20	Chandelier		Trygve Bakken	10.1038/s41586-019-1506-7	neocortex	UBERON_0001950	CCN201908211	Human|Mouse	RNAseq
Exc L5/6 IT 1	HM 021	CS201908211_21			Trygve Bakken	10.1038/s41586-019-1506-7	neocortex	UBERON_0001950	CCN201908211	Human|Mouse	RNAseq
Exc L4/5 IT	HM 022	CS201908211_22			Trygve Bakken	10.1038/s41586-019-1506-7	neocortex	UBERON_0001950	CCN201908211	Human|Mouse	RNAseq
Exc L3/5 IT	HM 023	CS201908211_23			Trygve Bakken	10.1038/s41586-019-1506-7	neocortex	UBERON_0001950	CCN201908211	Human|Mouse	RNAseq
Exc L5/6 IT 2	HM 024	CS201908211_24			Trygve Bakken	10.1038/s41586-019-1506-7	neocortex	UBERON_0001950	CCN201908211	Human|Mouse	RNAseq
Exc L5/6 IT 3	HM 025	CS201908211_25			Trygve Bakken	10.1038/s41586-019-1506-7	neocortex	UBERON_0001950	CCN201908211	Human|Mouse	RNAseq
Exc L2/3 IT	HM 026	CS201908211_26	L2/3 IT		Trygve Bakken	10.1038/s41586-019-1506-7	neocortex	UBERON_0001950	CCN201908211	Human|Mouse	RNAseq
Exc L6 IT 1	HM 027	CS201908211_27			Trygve Bakken	10.1038/s41586-019-1506-7	neocortex	UBERON_0001950	CCN201908211	Human|Mouse	RNAseq
Exc L6 IT 2	HM 028	CS201908211_28			Trygve Bakken	10.1038/s41586-019-1506-7	neocortex	UBERON_0001950	CCN201908211	Human|Mouse	RNAseq
Exc L5 PT	HM 029	CS201908211_29			Trygve Bakken	10.1038/s41586-019-1506-7	neocortex	UBERON_0001950	CCN201908211	Human|Mouse	RNAseq
Exc L5 PT (Mouse)	HM 030	CS201908211_30			Trygve Bakken	10.1038/s41586-019-1506-7	neocortex	UBERON_0001950	CCN201908211	Human|Mouse	RNAseq
Exc L6 CT	HM 031	CS201908211_31	L6 CT		Trygve Bakken	10.1038/s41586-019-1506-7	neocortex	UBERON_0001950	CCN201908211	Human|Mouse	RNAseq
Exc L6b	HM 032	CS201908211_32	L6b		Trygve Bakken	10.1038/s41586-019-1506-7	neocortex	UBERON_0001950	CCN201908211	Human|Mouse	RNAseq
Exc L5/6 NP	HM 033	CS201908211_33	L5/6 NP		Trygve Bakken	10.1038/s41586-019-1506-7	neocortex	UBERON_0001950	CCN201908211	Human|Mouse	RNAseq
Meis2	HM 034	CS201908211_34	Meis2		Trygve Bakken	10.1038/s41586-019-1506-7	neocortex	UBERON_0001950	CCN201908211	Human|Mouse	RNAseq
Cajal Retzius	HM 035	CS201908211_35		Cajal Retzius	Trygve Bakken	10.1038/s41586-019-1506-7	neocortex	UBERON_0001950	CCN201908211	Human|Mouse	RNAseq
Astrocyte	HM 036	CS201908211_36	Astrocyte		Trygve Bakken	10.1038/s41586-019-1506-7	neocortex	UBERON_0001950	CCN201908211	Human|Mouse	RNAseq
OPC	HM 037	CS201908211_37	OPC		Trygve Bakken	10.1038/s41586-019-1506-7	neocortex	UBERON_0001950	CCN201908211	Human|Mouse	RNAseq
Oligodendrocyte	HM 038	CS201908211_38	Oligodendrocyte		Trygve Bakken	10.1038/s41586-019-1506-7	neocortex	UBERON_0001950	CCN201908211	Human|Mouse	RNAseq
Microglia-PVM	HM 039	CS201908211_39	Microglia-PVM		Trygve Bakken	10.1038/s41586-019-1506-7	neocortex	UBERON_0001950	CCN201908211	Human|Mouse	RNAseq
Endothelial	HM 040	CS201908211_40	Endothelial		Trygve Bakken	10.1038/s41586-019-1506-7	neocortex	UBERON_0001950	CCN201908211	Human|Mouse	RNAseq
Pericyte	HM 041	CS201908211_41	Peri		Trygve Bakken	10.1038/s41586-019-1506-7	neocortex	UBERON_0001950	CCN201908211	Human|Mouse	RNAseq
SMC	HM 042	CS201908211_42	SMC		Trygve Bakken	10.1038/s41586-019-1506-7	neocortex	UBERON_0001950	CCN201908211	Human|Mouse	RNAseq
VLMC	HM 043	CS201908211_43	VLMC		Trygve Bakken	10.1038/s41586-019-1506-7	neocortex	UBERON_0001950	CCN201908211	Human|Mouse	RNAseq
	All cells	CS201908211_44			Trygve Bakken	10.1038/s41586-019-1506-7	neocortex	UBERON_0001950	CCN201908211	Human|Mouse	RNAseq
	HM 001-038	CS201908211_45			Trygve Bakken	10.1038/s41586-019-1506-7	neocortex	UBERON_0001950	CCN201908211	Human|Mouse	RNAseq
Neuron	HM 001-035	CS201908211_46		Neuron	Trygve Bakken	10.1038/s41586-019-1506-7	neocortex	UBERON_0001950	CCN201908211	Human|Mouse	RNAseq
	HM 001-034	CS201908211_47			Trygve Bakken	10.1038/s41586-019-1506-7	neocortex	UBERON_0001950	CCN201908211	Human|Mouse	RNAseq
	HM 001-033	CS201908211_48			Trygve Bakken	10.1038/s41586-019-1506-7	neocortex	UBERON_0001950	CCN201908211	Human|Mouse	RNAseq
GABAergic	HM 001-020	CS201908211_49	GABAergic		Trygve Bakken	10.1038/s41586-019-1506-7	neocortex	UBERON_0001950	CCN201908211	Human|Mouse	RNAseq
CGE	HM 001-011	CS201908211_50	CGE		Trygve Bakken	10.1038/s41586-019-1506-7	neocortex	UBERON_0001950	CCN201908211	Human|Mouse	RNAseq
Lamp5	HM 001-003	CS201908211_51	Lamp5		Trygve Bakken	10.1038/s41586-019-1506-7	neocortex	UBERON_0001950	CCN201908211	Human|Mouse	RNAseq
	HM 001-002	CS201908211_52			Trygve Bakken	10.1038/s41586-019-1506-7	neocortex	UBERON_0001950	CCN201908211	Human|Mouse	RNAseq
Vip	HM 004-011	CS201908211_53	Vip		Trygve Bakken	10.1038/s41586-019-1506-7	neocortex	UBERON_0001950	CCN201908211	Human|Mouse	RNAseq
	HM 004-007	CS201908211_54			Trygve Bakken	10.1038/s41586-019-1506-7	neocortex	UBERON_0001950	CCN201908211	Human|Mouse	RNAseq
	HM 005-007	CS201908211_55			Trygve Bakken	10.1038/s41586-019-1506-7	neocortex	UBERON_0001950	CCN201908211	Human|Mouse	RNAseq
	HM 005-006	CS201908211_56			Trygve Bakken	10.1038/s41586-019-1506-7	neocortex	UBERON_0001950	CCN201908211	Human|Mouse	RNAseq
	HM 008-011	CS201908211_57			Trygve Bakken	10.1038/s41586-019-1506-7	neocortex	UBERON_0001950	CCN201908211	Human|Mouse	RNAseq
	HM 009-011	CS201908211_58			Trygve Bakken	10.1038/s41586-019-1506-7	neocortex	UBERON_0001950	CCN201908211	Human|Mouse	RNAseq
	HM 009-010	CS201908211_59			Trygve Bakken	10.1038/s41586-019-1506-7	neocortex	UBERON_0001950	CCN201908211	Human|Mouse	RNAseq
MGE	HM 012-020	CS201908211_60	MGE		Trygve Bakken	10.1038/s41586-019-1506-7	neocortex	UBERON_0001950	CCN201908211	Human|Mouse	RNAseq
	HM 013-020	CS201908211_61			Trygve Bakken	10.1038/s41586-019-1506-7	neocortex	UBERON_0001950	CCN201908211	Human|Mouse	RNAseq
Sst	HM 013-017	CS201908211_62	Sst		Trygve Bakken	10.1038/s41586-019-1506-7	neocortex	UBERON_0001950	CCN201908211	Human|Mouse	RNAseq
	HM 013-016	CS201908211_63			Trygve Bakken	10.1038/s41586-019-1506-7	neocortex	UBERON_0001950	CCN201908211	Human|Mouse	RNAseq
	HM 013-014	CS201908211_64			Trygve Bakken	10.1038/s41586-019-1506-7	neocortex	UBERON_0001950	CCN201908211	Human|Mouse	RNAseq
	HM 015-016	CS201908211_65			Trygve Bakken	10.1038/s41586-019-1506-7	neocortex	UBERON_0001950	CCN201908211	Human|Mouse	RNAseq
Pvalb	HM 018-020	CS201908211_66	Pvalb		Trygve Bakken	10.1038/s41586-019-1506-7	neocortex	UBERON_0001950	CCN201908211	Human|Mouse	RNAseq
	HM 018-019	CS201908211_67			Trygve Bakken	10.1038/s41586-019-1506-7	neocortex	UBERON_0001950	CCN201908211	Human|Mouse	RNAseq
Glutamatergic	HM 021-033	CS201908211_68	Glutamatergic		Trygve Bakken	10.1038/s41586-019-1506-7	neocortex	UBERON_0001950	CCN201908211	Human|Mouse	RNAseq
	HM 021-032	CS201908211_69			Trygve Bakken	10.1038/s41586-019-1506-7	neocortex	UBERON_0001950	CCN201908211	Human|Mouse	RNAseq
IT	HM 021-028	CS201908211_70	IT		Trygve Bakken	10.1038/s41586-019-1506-7	neocortex	UBERON_0001950	CCN201908211	Human|Mouse	RNAseq
L4-6 IT	HM 021-025	CS201908211_71		L4-6 IT	Trygve Bakken	10.1038/s41586-019-1506-7	neocortex	UBERON_0001950	CCN201908211	Human|Mouse	RNAseq
	HM 022-025	CS201908211_72			Trygve Bakken	10.1038/s41586-019-1506-7	neocortex	UBERON_0001950	CCN201908211	Human|Mouse	RNAseq
	HM 022-023	CS201908211_73			Trygve Bakken	10.1038/s41586-019-1506-7	neocortex	UBERON_0001950	CCN201908211	Human|Mouse	RNAseq
	HM 024-025	CS201908211_74			Trygve Bakken	10.1038/s41586-019-1506-7	neocortex	UBERON_0001950	CCN201908211	Human|Mouse	RNAseq
	HM 026-028	CS201908211_75			Trygve Bakken	10.1038/s41586-019-1506-7	neocortex	UBERON_0001950	CCN201908211	Human|Mouse	RNAseq
	HM 026-027	CS201908211_76			Trygve Bakken	10.1038/s41586-019-1506-7	neocortex	UBERON_0001950	CCN201908211	Human|Mouse	RNAseq
	HM 029-032	CS201908211_77			Trygve Bakken	10.1038/s41586-019-1506-7	neocortex	UBERON_0001950	CCN201908211	Human|Mouse	RNAseq
L5 ET	HM 029-030	CS201908211_78	L5 ET	L5 PT	Trygve Bakken	10.1038/s41586-019-1506-7	neocortex	UBERON_0001950	CCN201908211	Human|Mouse	RNAseq
	HM 031-032	CS201908211_79			Trygve Bakken	10.1038/s41586-019-1506-7	neocortex	UBERON_0001950	CCN201908211	Human|Mouse	RNAseq
	HM 036-038	CS201908211_80			Trygve Bakken	10.1038/s41586-019-1506-7	neocortex	UBERON_0001950	CCN201908211	Human|Mouse	RNAseq
	HM 036-037	CS201908211_81			Trygve Bakken	10.1038/s41586-019-1506-7	neocortex	UBERON_0001950	CCN201908211	Human|Mouse	RNAseq
	HM 039-043	CS201908211_82			Trygve Bakken	10.1038/s41586-019-1506-7	neocortex	UBERON_0001950	CCN201908211	Human|Mouse	RNAseq
	HM 040-043	CS201908211_83			Trygve Bakken	10.1038/s41586-019-1506-7	neocortex	UBERON_0001950	CCN201908211	Human|Mouse	RNAseq
	HM 041-043	CS201908211_84			Trygve Bakken	10.1038/s41586-019-1506-7	neocortex	UBERON_0001950	CCN201908211	Human|Mouse	RNAseq
	HM 041-042	CS201908211_85			Trygve Bakken	10.1038/s41586-019-1506-7	neocortex	UBERON_0001950	CCN201908211	Human|Mouse	RNAseq
Non-Neuronal	HM 036-043	CS201908211_86	Non-Neuronal		Trygve Bakken	10.1038/s41586-019-1506-7	neocortex	UBERON_0001950	CCN201908211	Human|Mouse	RNAseq
tsExc1	Turtle 01	CS201805250_1			Maria Antonietta Tosches	10.1126/science.aar4237	pallium	UBERON_0000203	CCN201805250	Turtle	RNAseq
tsExc2	Turtle 02	CS201805250_2			Maria Antonietta Tosches	10.1126/science.aar4237	pallium	UBERON_0000203	CCN201805250	Turtle	RNAseq
tsExc3	Turtle 03	CS201805250_3			Maria Antonietta Tosches	10.1126/science.aar4237	pallium	UBERON_0000203	CCN201805250	Turtle	RNAseq
tsExc5	Turtle 04	CS201805250_4			Maria Antonietta Tosches	10.1126/science.aar4237	pallium	UBERON_0000203	CCN201805250	Turtle	RNAseq
tsExc4	Turtle 05	CS201805250_5			Maria Antonietta Tosches	10.1126/science.aar4237	pallium	UBERON_0000203	CCN201805250	Turtle	RNAseq
tsInh1	Turtle 06	CS201805250_6			Maria Antonietta Tosches	10.1126/science.aar4237	pallium	UBERON_0000203	CCN201805250	Turtle	RNAseq
tsInh2	Turtle 07	CS201805250_7			Maria Antonietta Tosches	10.1126/science.aar4237	pallium	UBERON_0000203	CCN201805250	Turtle	RNAseq
tsNPC	Turtle 08	CS201805250_8		Neural progenitor cells	Maria Antonietta Tosches	10.1126/science.aar4237	pallium	UBERON_0000203	CCN201805250	Turtle	RNAseq
tsOPC	Turtle 09	CS201805250_9	OPC		Maria Antonietta Tosches	10.1126/science.aar4237	pallium	UBERON_0000203	CCN201805250	Turtle	RNAseq
tsOlig	Turtle 10	CS201805250_10	Oligodendrocyte		Maria Antonietta Tosches	10.1126/science.aar4237	pallium	UBERON_0000203	CCN201805250	Turtle	RNAseq
tsEG	Turtle 11	CS201805250_11		Ependymoglial	Maria Antonietta Tosches	10.1126/science.aar4237	pallium	UBERON_0000203	CCN201805250	Turtle	RNAseq
tsMG	Turtle 12	CS201805250_12	Microglia		Maria Antonietta Tosches	10.1126/science.aar4237	pallium	UBERON_0000203	CCN201805250	Turtle	RNAseq
tsMur	Turtle 13	CS201805250_13		Mural cells	Maria Antonietta Tosches	10.1126/science.aar4237	pallium	UBERON_0000203	CCN201805250	Turtle	RNAseq
tsLeuB	Turtle 14	CS201805250_14		B leucocytes	Maria Antonietta Tosches	10.1126/science.aar4237	pallium	UBERON_0000203	CCN201805250	Turtle	RNAseq
tsLeuT	Turtle 15	CS201805250_15		T leucocytes	Maria Antonietta Tosches	10.1126/science.aar4237	pallium	UBERON_0000203	CCN201805250	Turtle	RNAseq
e29	Turtle 16	CS201805250_16			Maria Antonietta Tosches	10.1126/science.aar4237	hippocampal formation	UBERON_0002421	CCN201805250	Turtle	RNAseq
e30	Turtle 17	CS201805250_17			Maria Antonietta Tosches	10.1126/science.aar4237	hippocampal formation	UBERON_0002421	CCN201805250	Turtle	RNAseq
e31	Turtle 18	CS201805250_18			Maria Antonietta Tosches	10.1126/science.aar4237	hippocampal formation	UBERON_0002421	CCN201805250	Turtle	RNAseq
e32	Turtle 19	CS201805250_19			Maria Antonietta Tosches	10.1126/science.aar4237	hippocampal formation	UBERON_0002421	CCN201805250	Turtle	RNAseq
e33	Turtle 20	CS201805250_20			Maria Antonietta Tosches	10.1126/science.aar4237	hippocampal formation	UBERON_0002421	CCN201805250	Turtle	RNAseq
e34	Turtle 21	CS201805250_21			Maria Antonietta Tosches	10.1126/science.aar4237	hippocampal formation	UBERON_0002421	CCN201805250	Turtle	RNAseq
e35	Turtle 22	CS201805250_22			Maria Antonietta Tosches	10.1126/science.aar4237	hippocampal formation	UBERON_0002421	CCN201805250	Turtle	RNAseq
e36	Turtle 23	CS201805250_23			Maria Antonietta Tosches	10.1126/science.aar4237	hippocampal formation	UBERON_0002421	CCN201805250	Turtle	RNAseq
e37	Turtle 24	CS201805250_24			Maria Antonietta Tosches	10.1126/science.aar4237	hippocampal formation	UBERON_0002421	CCN201805250	Turtle	RNAseq
e38	Turtle 25	CS201805250_25			Maria Antonietta Tosches	10.1126/science.aar4237	hippocampal formation	UBERON_0002421	CCN201805250	Turtle	RNAseq
e24	Turtle 26	CS201805250_26			Maria Antonietta Tosches	10.1126/science.aar4237	hippocampal formation	UBERON_0002421	CCN201805250	Turtle	RNAseq
e28	Turtle 27	CS201805250_27			Maria Antonietta Tosches	10.1126/science.aar4237	hippocampal formation	UBERON_0002421	CCN201805250	Turtle	RNAseq
e27	Turtle 28	CS201805250_28			Maria Antonietta Tosches	10.1126/science.aar4237	hippocampal formation	UBERON_0002421	CCN201805250	Turtle	RNAseq
e26	Turtle 29	CS201805250_29			Maria Antonietta Tosches	10.1126/science.aar4237	hippocampal formation	UBERON_0002421	CCN201805250	Turtle	RNAseq
e13	Turtle 30	CS201805250_30			Maria Antonietta Tosches	10.1126/science.aar4237	neocortex	UBERON_0001950	CCN201805250	Turtle	RNAseq
e14	Turtle 31	CS201805250_31			Maria Antonietta Tosches	10.1126/science.aar4237	neocortex	UBERON_0001950	CCN201805250	Turtle	RNAseq
e15	Turtle 32	CS201805250_32			Maria Antonietta Tosches	10.1126/science.aar4237	neocortex	UBERON_0001950	CCN201805250	Turtle	RNAseq
e16	Turtle 33	CS201805250_33			Maria Antonietta Tosches	10.1126/science.aar4237	neocortex	UBERON_0001950	CCN201805250	Turtle	RNAseq
e07	Turtle 34	CS201805250_34			Maria Antonietta Tosches	10.1126/science.aar4237	neocortex	UBERON_0001950	CCN201805250	Turtle	RNAseq
e08	Turtle 35	CS201805250_35			Maria Antonietta Tosches	10.1126/science.aar4237	neocortex	UBERON_0001950	CCN201805250	Turtle	RNAseq
e03	Turtle 36	CS201805250_36			Maria Antonietta Tosches	10.1126/science.aar4237	pallium	UBERON_0000203	CCN201805250	Turtle	RNAseq
e04	Turtle 37	CS201805250_37			Maria Antonietta Tosches	10.1126/science.aar4237	pallium	UBERON_0000203	CCN201805250	Turtle	RNAseq
e05	Turtle 38	CS201805250_38			Maria Antonietta Tosches	10.1126/science.aar4237	pallium	UBERON_0000203	CCN201805250	Turtle	RNAseq
e06	Turtle 39	CS201805250_39			Maria Antonietta Tosches	10.1126/science.aar4237	pallium	UBERON_0000203	CCN201805250	Turtle	RNAseq
e09	Turtle 40	CS201805250_40			Maria Antonietta Tosches	10.1126/science.aar4237	pallium	UBERON_0000203	CCN201805250	Turtle	RNAseq
e10	Turtle 41	CS201805250_41			Maria Antonietta Tosches	10.1126/science.aar4237	pallium	UBERON_0000203	CCN201805250	Turtle	RNAseq
e11	Turtle 42	CS201805250_42			Maria Antonietta Tosches	10.1126/science.aar4237	pallium	UBERON_0000203	CCN201805250	Turtle	RNAseq
e12	Turtle 43	CS201805250_43			Maria Antonietta Tosches	10.1126/science.aar4237	pallium	UBERON_0000203	CCN201805250	Turtle	RNAseq
e17	Turtle 44	CS201805250_44		Posterior lateral cortex	Maria Antonietta Tosches	10.1126/science.aar4237	pallium	UBERON_0000203	CCN201805250	Turtle	RNAseq
e01	Turtle 45	CS201805250_45			Maria Antonietta Tosches	10.1126/science.aar4237	pallium	UBERON_0000203	CCN201805250	Turtle	RNAseq
e02	Turtle 46	CS201805250_46			Maria Antonietta Tosches	10.1126/science.aar4237	pallium	UBERON_0000203	CCN201805250	Turtle	RNAseq
e19	Turtle 47	CS201805250_47			Maria Antonietta Tosches	10.1126/science.aar4237	pallium	UBERON_0000203	CCN201805250	Turtle	RNAseq
e18	Turtle 48	CS201805250_48			Maria Antonietta Tosches	10.1126/science.aar4237	pallium	UBERON_0000203	CCN201805250	Turtle	RNAseq
e20	Turtle 49	CS201805250_49			Maria Antonietta Tosches	10.1126/science.aar4237	pallium	UBERON_0000203	CCN201805250	Turtle	RNAseq
e21	Turtle 50	CS201805250_50			Maria Antonietta Tosches	10.1126/science.aar4237	pallium	UBERON_0000203	CCN201805250	Turtle	RNAseq
e22	Turtle 51	CS201805250_51			Maria Antonietta Tosches	10.1126/science.aar4237	pallium	UBERON_0000203	CCN201805250	Turtle	RNAseq
e23	Turtle 52	CS201805250_52			Maria Antonietta Tosches	10.1126/science.aar4237	pallium	UBERON_0000203	CCN201805250	Turtle	RNAseq
e25	Turtle 53	CS201805250_53			Maria Antonietta Tosches	10.1126/science.aar4237	pallium	UBERON_0000203	CCN201805250	Turtle	RNAseq
i02	Turtle 54	CS201805250_54			Maria Antonietta Tosches	10.1126/science.aar4237	pallium	UBERON_0000203	CCN201805250	Turtle	RNAseq
i03	Turtle 55	CS201805250_55			Maria Antonietta Tosches	10.1126/science.aar4237	pallium	UBERON_0000203	CCN201805250	Turtle	RNAseq
i04	Turtle 56	CS201805250_56		Striatum	Maria Antonietta Tosches	10.1126/science.aar4237	pallium	UBERON_0000203	CCN201805250	Turtle	RNAseq
i05	Turtle 57	CS201805250_57			Maria Antonietta Tosches	10.1126/science.aar4237	pallium	UBERON_0000203	CCN201805250	Turtle	RNAseq
i06	Turtle 58	CS201805250_58			Maria Antonietta Tosches	10.1126/science.aar4237	pallium	UBERON_0000203	CCN201805250	Turtle	RNAseq
i01	Turtle 59	CS201805250_59		Olfactory bulb	Maria Antonietta Tosches	10.1126/science.aar4237	pallium	UBERON_0000203	CCN201805250	Turtle	RNAseq
i14	Turtle 60	CS201805250_60			Maria Antonietta Tosches	10.1126/science.aar4237	pallium	UBERON_0000203	CCN201805250	Turtle	RNAseq
i15	Turtle 61	CS201805250_61			Maria Antonietta Tosches	10.1126/science.aar4237	pallium	UBERON_0000203	CCN201805250	Turtle	RNAseq
i16	Turtle 62	CS201805250_62			Maria Antonietta Tosches	10.1126/science.aar4237	pallium	UBERON_0000203	CCN201805250	Turtle	RNAseq
i17	Turtle 63	CS201805250_63			Maria Antonietta Tosches	10.1126/science.aar4237	pallium	UBERON_0000203	CCN201805250	Turtle	RNAseq
i18	Turtle 64	CS201805250_64			Maria Antonietta Tosches	10.1126/science.aar4237	pallium	UBERON_0000203	CCN201805250	Turtle	RNAseq
i07	Turtle 65	CS201805250_65			Maria Antonietta Tosches	10.1126/science.aar4237	pallium	UBERON_0000203	CCN201805250	Turtle	RNAseq
i08	Turtle 66	CS201805250_66			Maria Antonietta Tosches	10.1126/science.aar4237	pallium	UBERON_0000203	CCN201805250	Turtle	RNAseq
i09	Turtle 67	CS201805250_67			Maria Antonietta Tosches	10.1126/science.aar4237	pallium	UBERON_0000203	CCN201805250	Turtle	RNAseq
i10	Turtle 68	CS201805250_68			Maria Antonietta Tosches	10.1126/science.aar4237	pallium	UBERON_0000203	CCN201805250	Turtle	RNAseq
i12	Turtle 69	CS201805250_69			Maria Antonietta Tosches	10.1126/science.aar4237	pallium	UBERON_0000203	CCN201805250	Turtle	RNAseq
i11	Turtle 70	CS201805250_70			Maria Antonietta Tosches	10.1126/science.aar4237	pallium	UBERON_0000203	CCN201805250	Turtle	RNAseq
i13	Turtle 71	CS201805250_71			Maria Antonietta Tosches	10.1126/science.aar4237	pallium	UBERON_0000203	CCN201805250	Turtle	RNAseq
Medial cortex	Turtle 16-19	CS201805250_72			Maria Antonietta Tosches	10.1126/science.aar4237	hippocampal formation	UBERON_0002421	CCN201805250	Turtle	RNAseq
Dorsomedial cortex	Turtle 20-25	CS201805250_73			Maria Antonietta Tosches	10.1126/science.aar4237	hippocampal formation	UBERON_0002421	CCN201805250	Turtle	RNAseq
Posterior dorsal cortex	Turtle 26-29	CS201805250_74			Maria Antonietta Tosches	10.1126/science.aar4237	hippocampal formation	UBERON_0002421	CCN201805250	Turtle	RNAseq
Anterior dorsal cortex	Turtle 30-35	CS201805250_75			Maria Antonietta Tosches	10.1126/science.aar4237	neocortex	UBERON_0001950	CCN201805250	Turtle	RNAseq
Pallial thickening	Turtle 36-39	CS201805250_76			Maria Antonietta Tosches	10.1126/science.aar4237	pallium	UBERON_0000203	CCN201805250	Turtle	RNAseq
Anterior lateral cortex	Turtle 40-43	CS201805250_77			Maria Antonietta Tosches	10.1126/science.aar4237	pallium	UBERON_0000203	CCN201805250	Turtle	RNAseq
Anterior dorsal ventricular ridge	Turtle 45-48	CS201805250_78			Maria Antonietta Tosches	10.1126/science.aar4237	pallium	UBERON_0000203	CCN201805250	Turtle	RNAseq
Posterior dorsal ventricular ridge	Turtle 49-53	CS201805250_79			Maria Antonietta Tosches	10.1126/science.aar4237	pallium	UBERON_0000203	CCN201805250	Turtle	RNAseq
Anterior dorsal cortex	Turtle 30-35	CS201805250_80			Maria Antonietta Tosches	10.1126/science.aar4237	pallium	UBERON_0000203	CCN201805250	Turtle	RNAseq
Upper layer neurons (L2b)	Turtle 30-33	CS201805250_81		L2/3-L4 IT	Maria Antonietta Tosches	10.1126/science.aar4237	neocortex	UBERON_0001950	CCN201805250	Turtle	RNAseq
Deep layer neurons (L2a)	Turtle 34-35	CS201805250_82		L5-L6	Maria Antonietta Tosches	10.1126/science.aar4237	neocortex	UBERON_0001950	CCN201805250	Turtle	RNAseq
LGE	Turtle 56-59	CS201805250_83			Maria Antonietta Tosches	10.1126/science.aar4237	pallium	UBERON_0000203	CCN201805250	Turtle	RNAseq
CGE	Turtle 60-64	CS201805250_84	CGE/PoA		Maria Antonietta Tosches	10.1126/science.aar4237	pallium	UBERON_0000203	CCN201805250	Turtle	RNAseq
MGE	Turtle 65-71	CS201805250_85	MGE		Maria Antonietta Tosches	10.1126/science.aar4237	pallium	UBERON_0000203	CCN201805250	Turtle	RNAseq
Septum	Turtle 54-55	CS201805250_86			Maria Antonietta Tosches	10.1126/science.aar4237	pallium	UBERON_0000203	CCN201805250	Turtle	RNAseq
Amygdala	Turtle 57-58	CS201805250_87			Maria Antonietta Tosches	10.1126/science.aar4237	pallium	UBERON_0000203	CCN201805250	Turtle	RNAseq
HTR3A VIP-like	Turtle 60-62	CS201805250_88	Vip		Maria Antonietta Tosches	10.1126/science.aar4237	pallium	UBERON_0000203	CCN201805250	Turtle	RNAseq
HTR3A Reln	Turtle 63-64	CS201805250_89			Maria Antonietta Tosches	10.1126/science.aar4237	pallium	UBERON_0000203	CCN201805250	Turtle	RNAseq
SST	Turtle 65-68	CS201805250_90	Sst		Maria Antonietta Tosches	10.1126/science.aar4237	pallium	UBERON_0000203	CCN201805250	Turtle	RNAseq
PV-like	Turtle 69-71	CS201805250_91	Pvalb		Maria Antonietta Tosches	10.1126/science.aar4237	pallium	UBERON_0000203	CCN201805250	Turtle	RNAseq
Glutamatergic	Turtle 16-53	CS201805250_92	Glutamatergic		Maria Antonietta Tosches	10.1126/science.aar4237	pallium	UBERON_0000203	CCN201805250	Turtle	RNAseq
GABAergic	Turtle 54-71	CS201805250_93	GABAergic		Maria Antonietta Tosches	10.1126/science.aar4237	pallium	UBERON_0000203	CCN201805250	Turtle	RNAseq
Non-Neuronal	Turtle 09-15	CS201805250_94	Non-Neuronal		Maria Antonietta Tosches	10.1126/science.aar4237	pallium	UBERON_0000203	CCN201805250	Turtle	RNAseq
Lamp5-MET-1	MET 01	CS202005150_1		VISp_ALM 059-061 in CCN201810310|L1 neurogliaform cells	Nathan Gouwens	10.1101/2020.02.03.932244	primary visual cortex	UBERON_0002436	CCN202005150	Mouse	Morphology|Electrophysiology|RNAseq
Lamp5-MET-2	MET 02	CS202005150_2	Lamp5 Lhx6	VISp_ALM 062 in CCN201810310|Deep late-spiking neurogliaform cells	Nathan Gouwens	10.1101/2020.02.03.932244	primary visual cortex	UBERON_0002436	CCN202005150	Mouse	Morphology|Electrophysiology|RNAseq
Sncg-MET-1	MET 03	CS202005150_3		VISp_ALM 064-066, 084 in CCN201810310|Vip+/Cck+ basket cells	Nathan Gouwens	10.1101/2020.02.03.932244	primary visual cortex	UBERON_0002436	CCN202005150	Mouse	Morphology|Electrophysiology|RNAseq
Sncg-MET-2	MET 04	CS202005150_4		VISp_ALM 064-065 in CCN201810310|Vip+/Cck+ basket cells	Nathan Gouwens	10.1101/2020.02.03.932244	primary visual cortex	UBERON_0002436	CCN202005150	Mouse	Morphology|Electrophysiology|RNAseq
Sncg-MET-3	MET 05	CS202005150_5		VISp_ALM 063 in CCN201810310|Vip+/Cck+ basket cells	Nathan Gouwens	10.1101/2020.02.03.932244	primary visual cortex	UBERON_0002436	CCN202005150	Mouse	Morphology|Electrophysiology|RNAseq
Vip-MET-1	MET 06	CS202005150_6		VISp_ALM 073, 079-081 in CCN201810310|Bipolar and Bitufted cells	Nathan Gouwens	10.1101/2020.02.03.932244	primary visual cortex	UBERON_0002436	CCN202005150	Mouse	Morphology|Electrophysiology|RNAseq
Vip-MET-2	MET 07	CS202005150_7		VISp_ALM 075-077 in CCN201810310|Bipolar and Bitufted cells	Nathan Gouwens	10.1101/2020.02.03.932244	primary visual cortex	UBERON_0002436	CCN202005150	Mouse	Morphology|Electrophysiology|RNAseq
Vip-MET-3	MET 08	CS202005150_8		VISp_ALM 071 in CCN201810310|Bipolar and Bitufted cells	Nathan Gouwens	10.1101/2020.02.03.932244	primary visual cortex	UBERON_0002436	CCN202005150	Mouse	Morphology|Electrophysiology|RNAseq
Vip-MET-4	MET 09	CS202005150_9		VISp_ALM 072, 078, 083 in CCN201810310|Bipolar and Bitufted cells	Nathan Gouwens	10.1101/2020.02.03.932244	primary visual cortex	UBERON_0002436	CCN202005150	Mouse	Morphology|Electrophysiology|RNAseq
Vip-MET-5	MET 10	CS202005150_10		VISp_ALM 078-079, 082-083 in CCN201810310|Vip+ Basket Cell	Nathan Gouwens	10.1101/2020.02.03.932244	primary visual cortex	UBERON_0002436	CCN202005150	Mouse	Morphology|Electrophysiology|RNAseq
Sst-MET-1	MET 11	CS202005150_11	Sst Chodl	VISp_ALM 085 in CCN201810310|Long-range projecting interneuron	Nathan Gouwens	10.1101/2020.02.03.932244	primary visual cortex	UBERON_0002436	CCN202005150	Mouse	Morphology|Electrophysiology|RNAseq
Sst-MET-2	MET 12	CS202005150_12		VISp_ALM 087-089 in CCN201810310|L2/3 Non-Martinotti and Martinotti	Nathan Gouwens	10.1101/2020.02.03.932244	primary visual cortex	UBERON_0002436	CCN202005150	Mouse	Morphology|Electrophysiology|RNAseq
Sst-MET-3	MET 13	CS202005150_13		VISp_ALM 089-090, 098 in CCN201810310|L2/3 and L4 Martinotti	Nathan Gouwens	10.1101/2020.02.03.932244	primary visual cortex	UBERON_0002436	CCN202005150	Mouse	Morphology|Electrophysiology|RNAseq
Sst-MET-4	MET 14	CS202005150_14		VISp_ALM 089-091 in CCN201810310|Fanning and T-shaped Martinott	Nathan Gouwens	10.1101/2020.02.03.932244	primary visual cortex	UBERON_0002436	CCN202005150	Mouse	Morphology|Electrophysiology|RNAseq
Sst-MET-5	MET 15	CS202005150_15		VISp_ALM 091-092 in CCN201810310|Fanning Martinotti	Nathan Gouwens	10.1101/2020.02.03.932244	primary visual cortex	UBERON_0002436	CCN202005150	Mouse	Morphology|Electrophysiology|RNAseq
Sst-MET-6	MET 16	CS202005150_16		VISp_ALM 092-093, 095 in CCN201810310|T-shaped and non-Martinotti	Nathan Gouwens	10.1101/2020.02.03.932244	primary visual cortex	UBERON_0002436	CCN202005150	Mouse	Morphology|Electrophysiology|RNAseq
Sst-MET-7	MET 17	CS202005150_17		VISp_ALM 097 in CCN201810310|T-shaped and L4 non-Martinotti	Nathan Gouwens	10.1101/2020.02.03.932244	primary visual cortex	UBERON_0002436	CCN202005150	Mouse	Morphology|Electrophysiology|RNAseq
Sst-MET-8	MET 18	CS202005150_18		VISp_ALM 098 in CCN201810310|L4/L5 Martinotti and Non-Martinotti	Nathan Gouwens	10.1101/2020.02.03.932244	primary visual cortex	UBERON_0002436	CCN202005150	Mouse	Morphology|Electrophysiology|RNAseq
Sst-MET-9	MET 19	CS202005150_19		VISp_ALM 096, 102 in CCN201810310|Wide Fanning Martinotti and deep Non-Martinotti	Nathan Gouwens	10.1101/2020.02.03.932244	primary visual cortex	UBERON_0002436	CCN202005150	Mouse	Morphology|Electrophysiology|RNAseq
Sst-MET-10	MET 20	CS202005150_20		VISp_ALM 104, 107 in CCN201810310|L5 and L6 Non-Martinotti and Martinotti	Nathan Gouwens	10.1101/2020.02.03.932244	primary visual cortex	UBERON_0002436	CCN202005150	Mouse	Morphology|Electrophysiology|RNAseq
Sst-MET-11	MET 21	CS202005150_21		VISp_ALM 086, 098 in CCN201810310|L5 Martinotti and Non-Martinotti	Nathan Gouwens	10.1101/2020.02.03.932244	primary visual cortex	UBERON_0002436	CCN202005150	Mouse	Morphology|Electrophysiology|RNAseq
Sst-MET-12	MET 22	CS202005150_22		VISp_ALM 086, 098-101, 103 in CCN201810310|Mostly Non-Martinotti	Nathan Gouwens	10.1101/2020.02.03.932244	primary visual cortex	UBERON_0002436	CCN202005150	Mouse	Morphology|Electrophysiology|RNAseq
Sst-MET-13	MET 23	CS202005150_23		VISp_ALM 101, 105 in CCN201810310|Deep Non-Martinotti and Martinotti	Nathan Gouwens	10.1101/2020.02.03.932244	primary visual cortex	UBERON_0002436	CCN202005150	Mouse	Morphology|Electrophysiology|RNAseq
Pvalb-MET-1	MET 24	CS202005150_24		VISp_ALM 106 in CCN201810310|Fast spiking basket cell and nest basket cell	Nathan Gouwens	10.1101/2020.02.03.932244	primary visual cortex	UBERON_0002436	CCN202005150	Mouse	Morphology|Electrophysiology|RNAseq
Pvalb-MET-2	MET 25	CS202005150_25		VISp_ALM 107-110 in CCN201810310|Basket cell	Nathan Gouwens	10.1101/2020.02.03.932244	primary visual cortex	UBERON_0002436	CCN202005150	Mouse	Morphology|Electrophysiology|RNAseq
Pvalb-MET-3	MET 26	CS202005150_26		VISp_ALM 111, 113 in CCN201810310|Intralaminar and basket cell	Nathan Gouwens	10.1101/2020.02.03.932244	primary visual cortex	UBERON_0002436	CCN202005150	Mouse	Morphology|Electrophysiology|RNAseq
Pvalb-MET-4	MET 27	CS202005150_27		VISp_ALM 112, 114 in CCN201810310|Intralaminar and translaminar cell	Nathan Gouwens	10.1101/2020.02.03.932244	primary visual cortex	UBERON_0002436	CCN202005150	Mouse	Morphology|Electrophysiology|RNAseq
Pvalb-MET-5	MET 28	CS202005150_28	Chandelier	VISp_ALM 115 in CCN201810310	Nathan Gouwens	10.1101/2020.02.03.932244	primary visual cortex	UBERON_0002436	CCN202005150	Mouse	Morphology|Electrophysiology|RNAseq
Lamp5	MET 01-02	CS202005150_29	Lamp5		Nathan Gouwens	10.1101/2020.02.03.932244	primary visual cortex	UBERON_0002436	CCN202005150	Mouse	Morphology|Electrophysiology|RNAseq
Sncg	MET 03-05	CS202005150_30	Sncg		Nathan Gouwens	10.1101/2020.02.03.932244	primary visual cortex	UBERON_0002436	CCN202005150	Mouse	Morphology|Electrophysiology|RNAseq
Vip	MET 06-10	CS202005150_31	Vip		Nathan Gouwens	10.1101/2020.02.03.932244	primary visual cortex	UBERON_0002436	CCN202005150	Mouse	Morphology|Electrophysiology|RNAseq
Sst	MET 11-23	CS202005150_32	Sst		Nathan Gouwens	10.1101/2020.02.03.932244	primary visual cortex	UBERON_0002436	CCN202005150	Mouse	Morphology|Electrophysiology|RNAseq
Pvalb	MET 24-28	CS202005150_33	Pvalb		Nathan Gouwens	10.1101/2020.02.03.932244	primary visual cortex	UBERON_0002436	CCN202005150	Mouse	Morphology|Electrophysiology|RNAseq
ME_Inh_1	ME 01	CS201906170_1		Descending axon, bidirectional dendrites L2/3, L4|irregular/sustained	Nathan Gouwens	10.1038/s41593-019-0417-0	primary visual cortex	UBERON_0002436	CCN201906170	Mouse	Morphology|Electrophysiology
ME_Inh_2	ME 02	CS201906170_2		Descending axon, bidirectional dendrites L2/3|transient & irregular, sharp sag	Nathan Gouwens	10.1038/s41593-019-0417-0	primary visual cortex	UBERON_0002436	CCN201906170	Mouse	Morphology|Electrophysiology
ME_Inh_3	ME 03	CS201906170_3		Descending axon, bidirectional dendrites|irregular	Nathan Gouwens	10.1038/s41593-019-0417-0	primary visual cortex	UBERON_0002436	CCN201906170	Mouse	Morphology|Electrophysiology
ME_Inh_4	ME 04	CS201906170_4		Descending axon, bidirectional dendrites L2/3, L4|transient	Nathan Gouwens	10.1038/s41593-019-0417-0	primary visual cortex	UBERON_0002436	CCN201906170	Mouse	Morphology|Electrophysiology
ME_Inh_5	ME 05	CS201906170_5		Descending axon, bidirectional dendrites L2/3|irregular	Nathan Gouwens	10.1038/s41593-019-0417-0	primary visual cortex	UBERON_0002436	CCN201906170	Mouse	Morphology|Electrophysiology
ME_Inh_6	ME 06	CS201906170_6		Wide axon, large dendrites L6|FS transient & sustained	Nathan Gouwens	10.1038/s41593-019-0417-0	primary visual cortex	UBERON_0002436	CCN201906170	Mouse	Morphology|Electrophysiology
ME_Inh_7	ME 07	CS201906170_7		Wide axon, large dendrites L6|FS transient	Nathan Gouwens	10.1038/s41593-019-0417-0	primary visual cortex	UBERON_0002436	CCN201906170	Mouse	Morphology|Electrophysiology
ME_Inh_8	ME 08	CS201906170_8		Dense axon, intersecting dendrites L5, L4|FS transient	Nathan Gouwens	10.1038/s41593-019-0417-0	primary visual cortex	UBERON_0002436	CCN201906170	Mouse	Morphology|Electrophysiology
ME_Inh_9	ME 09	CS201906170_9		Ascending axon L5, L6|FS transient & pausing	Nathan Gouwens	10.1038/s41593-019-0417-0	primary visual cortex	UBERON_0002436	CCN201906170	Mouse	Morphology|Electrophysiology
ME_Inh_10	ME 10	CS201906170_10		Ascending axon|FS delayed & sustained	Nathan Gouwens	10.1038/s41593-019-0417-0	primary visual cortex	UBERON_0002436	CCN201906170	Mouse	Morphology|Electrophysiology
ME_Inh_11	ME 11	CS201906170_11		Ascending axon L5, L6|FS delayed/pausing	Nathan Gouwens	10.1038/s41593-019-0417-0	primary visual cortex	UBERON_0002436	CCN201906170	Mouse	Morphology|Electrophysiology
ME_Inh_12	ME 12	CS201906170_12		Small axon, intersecting dendrites|FS delayed/pausing	Nathan Gouwens	10.1038/s41593-019-0417-0	primary visual cortex	UBERON_0002436	CCN201906170	Mouse	Morphology|Electrophysiology
ME_Inh_13	ME 13	CS201906170_13		Ascending small axon L5, L4|FS transient & sustained	Nathan Gouwens	10.1038/s41593-019-0417-0	primary visual cortex	UBERON_0002436	CCN201906170	Mouse	Morphology|Electrophysiology
ME_Inh_14	ME 14	CS201906170_14		Dense axon, intersecting dendrites L4, L2/3|FS sustained & delayed/pausing	Nathan Gouwens	10.1038/s41593-019-0417-0	primary visual cortex	UBERON_0002436	CCN201906170	Mouse	Morphology|Electrophysiology
ME_Inh_15	ME 15	CS201906170_15		L1-innervating ascending axon L2/3, L4|mid-width AP adapting & FS pausing	Nathan Gouwens	10.1038/s41593-019-0417-0	primary visual cortex	UBERON_0002436	CCN201906170	Mouse	Morphology|Electrophysiology
ME_Inh_16	ME 16	CS201906170_16		Descending dense, wide axon L2/3|FS delayed/pausing	Nathan Gouwens	10.1038/s41593-019-0417-0	primary visual cortex	UBERON_0002436	CCN201906170	Mouse	Morphology|Electrophysiology
ME_Inh_17	ME 17	CS201906170_17		Late-spiking L1 neurogliaform cells	Nathan Gouwens	10.1038/s41593-019-0417-0	primary visual cortex	UBERON_0002436	CCN201906170	Mouse	Morphology|Electrophysiology
ME_Inh_18	ME 18	CS201906170_18		Dense axon, large dendrites L1|irregular	Nathan Gouwens	10.1038/s41593-019-0417-0	primary visual cortex	UBERON_0002436	CCN201906170	Mouse	Morphology|Electrophysiology
ME_Inh_19	ME 19	CS201906170_19	Lamp5 Lhx6	Dense axon, small dendrites L6|RS non- adapting, delayed	Nathan Gouwens	10.1038/s41593-019-0417-0	primary visual cortex	UBERON_0002436	CCN201906170	Mouse	Morphology|Electrophysiology
ME_Inh_20	ME 20	CS201906170_20		Dense axon, small dendrites L2/3, L4|RS non- adapting, delayed	Nathan Gouwens	10.1038/s41593-019-0417-0	primary visual cortex	UBERON_0002436	CCN201906170	Mouse	Morphology|Electrophysiology
ME_Inh_21	ME 21	CS201906170_21	Chandelier	Descending axon, small juxtaposed dendrites L2/3|FS transient, sustained, & delayed/pausing	Nathan Gouwens	10.1038/s41593-019-0417-0	primary visual cortex	UBERON_0002436	CCN201906170	Mouse	Morphology|Electrophysiology
ME_Inh_22	ME 22	CS201906170_22		Small axon, large dendrites L5, L6|irregular/adapting, long tm	Nathan Gouwens	10.1038/s41593-019-0417-0	primary visual cortex	UBERON_0002436	CCN201906170	Mouse	Morphology|Electrophysiology
ME_Inh_23	ME 23	CS201906170_23	Sst Chodl	Wide axon, large dendrites L5, L6|irregular/adapting, long tm	Nathan Gouwens	10.1038/s41593-019-0417-0	primary visual cortex	UBERON_0002436	CCN201906170	Mouse	Morphology|Electrophysiology
ME_Inh_24	ME 24	CS201906170_24		Large ascending axon L5, L6|mid-width AP adapting & transient	Nathan Gouwens	10.1038/s41593-019-0417-0	primary visual cortex	UBERON_0002436	CCN201906170	Mouse	Morphology|Electrophysiology
ME_Inh_25	ME 25	CS201906170_25		L1-innervating ascending axon L2/3, L4 & ascending large axon L5|mid-width AP adapting	Nathan Gouwens	10.1038/s41593-019-0417-0	primary visual cortex	UBERON_0002436	CCN201906170	Mouse	Morphology|Electrophysiology
ME_Inh_26	ME 26	CS201906170_26		Ascending small axon L5, L4|mid-width AP transient/irregular	Nathan Gouwens	10.1038/s41593-019-0417-0	primary visual cortex	UBERON_0002436	CCN201906170	Mouse	Morphology|Electrophysiology
ME_Exc_7	ME 27	CS201906170_27	L2/3 IT	Wide, short L2/3|RS adapting	Nathan Gouwens	10.1038/s41593-019-0417-0	primary visual cortex	UBERON_0002436	CCN201906170	Mouse	Morphology|Electrophysiology
ME_Exc_14	ME 28	CS201906170_28		Tufted (sparse) L4|RS adapting	Nathan Gouwens	10.1038/s41593-019-0417-0	primary visual cortex	UBERON_0002436	CCN201906170	Mouse	Morphology|Electrophysiology
ME_Exc_18	ME 29	CS201906170_29		Non-tufted L4|RS adapting	Nathan Gouwens	10.1038/s41593-019-0417-0	primary visual cortex	UBERON_0002436	CCN201906170	Mouse	Morphology|Electrophysiology
ME_Exc_13	ME 30	CS201906170_30	L5 IT	Tufted L5|RS adapting	Nathan Gouwens	10.1038/s41593-019-0417-0	primary visual cortex	UBERON_0002436	CCN201906170	Mouse	Morphology|Electrophysiology
ME_Exc_1	ME 31	CS201906170_31	L5 CF	Thick-tufted L5|RS low Ri, sharp sag	Nathan Gouwens	10.1038/s41593-019-0417-0	primary visual cortex	UBERON_0002436	CCN201906170	Mouse	Morphology|Electrophysiology
ME_Exc_8	ME 32	CS201906170_32	L5 NP	Tufted (sparse basal) L5|RS adapting, large sag	Nathan Gouwens	10.1038/s41593-019-0417-0	primary visual cortex	UBERON_0002436	CCN201906170	Mouse	Morphology|Electrophysiology
ME_Exc_6	ME 33	CS201906170_33		Wide, short L6a & tufted (large basal) L5|RS adapting	Nathan Gouwens	10.1038/s41593-019-0417-0	primary visual cortex	UBERON_0002436	CCN201906170	Mouse	Morphology|Electrophysiology
ME_Exc_11	ME 34	CS201906170_34		Inverted L6a, b|RS adapting	Nathan Gouwens	10.1038/s41593-019-0417-0	primary visual cortex	UBERON_0002436	CCN201906170	Mouse	Morphology|Electrophysiology
ME_Exc_2	ME 35	CS201906170_35		Narrow L6a|RS adapting	Nathan Gouwens	10.1038/s41593-019-0417-0	primary visual cortex	UBERON_0002436	CCN201906170	Mouse	Morphology|Electrophysiology
ME_Exc_4	ME 36	CS201906170_36		Narrow L6a|RS transient	Nathan Gouwens	10.1038/s41593-019-0417-0	primary visual cortex	UBERON_0002436	CCN201906170	Mouse	Morphology|Electrophysiology
ME_Exc_9	ME 37	CS201906170_37	L6b	Subplate L6b	Nathan Gouwens	10.1038/s41593-019-0417-0	primary visual cortex	UBERON_0002436	CCN201906170	Mouse	Morphology|Electrophysiology
GABAergic	ME 01-26	CS201906170_38	GABAergic		Nathan Gouwens	10.1038/s41593-019-0417-0	primary visual cortex	UBERON_0002436	CCN201906170	Mouse	Morphology|Electrophysiology
Glutamatergic	ME 27-37	CS201906170_39	Glutamatergic		Nathan Gouwens	10.1038/s41593-019-0417-0	primary visual cortex	UBERON_0002436	CCN201906170	Mouse	Morphology|Electrophysiology
Vip	ME 01-05	CS201906170_40	Vip		Nathan Gouwens	10.1038/s41593-019-0417-0	primary visual cortex	UBERON_0002436	CCN201906170	Mouse	Morphology|Electrophysiology
Pvalb	ME 06-14, 16, 21	CS201906170_41	Pvalb	Fast spiking	Nathan Gouwens	10.1038/s41593-019-0417-0	primary visual cortex	UBERON_0002436	CCN201906170	Mouse	Morphology|Electrophysiology
Sst	ME 15, 22-26	CS201906170_42	Sst		Nathan Gouwens	10.1038/s41593-019-0417-0	primary visual cortex	UBERON_0002436	CCN201906170	Mouse	Morphology|Electrophysiology
Lamp5	ME 17-20	CS201906170_43	Lamp5		Nathan Gouwens	10.1038/s41593-019-0417-0	primary visual cortex	UBERON_0002436	CCN201906170	Mouse	Morphology|Electrophysiology
L4	ME 28-29	CS201906170_44	L4		Nathan Gouwens	10.1038/s41593-019-0417-0	primary visual cortex	UBERON_0002436	CCN201906170	Mouse	Morphology|Electrophysiology
L6 IT	ME 33-34	CS201906170_45	L6 IT		Nathan Gouwens	10.1038/s41593-019-0417-0	primary visual cortex	UBERON_0002436	CCN201906170	Mouse	Morphology|Electrophysiology
L6 CT	ME 35-36	CS201906170_46	L6 CT		Nathan Gouwens	10.1038/s41593-019-0417-0	primary visual cortex	UBERON_0002436	CCN201906170	Mouse	Morphology|Electrophysiology
Sst (Martinotti)	ME 15, 24-25	CS201906170_47		Martinotti	Nathan Gouwens	10.1038/s41593-019-0417-0	primary visual cortex	UBERON_0002436	CCN201906170	Mouse	Morphology|Electrophysiology
Sst (Non-Martinotti)	ME 22-23	CS201906170_48		Deep non-Martinotti	Nathan Gouwens	10.1038/s41593-019-0417-0	primary visual cortex	UBERON_0002436	CCN201906170	Mouse	Morphology|Electrophysiology
