# Supplementary material for: Common cell type nomenclature for the mammalian brain
Source: eLife. 2020 Dec 29;9:e59928. doi: 10.7554/eLife.59928 (PMC7790494; doi:10.7554/eLife.59928)
Supplement: Supplementary file 2. — These terms are also applicable to other cortical areas, representing a starting point for future cell type classification efforts and for ontology curation. InterLex identifiers are provided in parentheses when available (Adkins et al., 2020). [file elife-59928-supp2.xlsx]

## Sheet: Supplementary Table 1
Aligned aliases	Alternative aliases / Description / Notes
Lamp5	(ILX:0770149)
Lamp5 Lhx6	A distinct Lamp5 type also expressing the MGE marker Lhx6
Sncg	(ILX:0770150)
Vip	(ILX:0770151)
Sst Chodl	A very distinct Sst type expressing the gene Chodl in mouse; the only reported long-range projecting GABAergic type (ILX:0770153)
Sst	(ILX:0770152)
Pvalb	Includes basket and chandelier cells (ILX:0770154)
Chandelier
Meis2	A very distinct GABAergic type expressing the gene Meis2 in mouse
CR	Cajal Retzius
L2/3 IT	Intratelencephalic (ILX:0770156)
L4	Intratelencephalic; sparsely present in M1
L5 IT	Intratelencephalic (ILX:0770157)
L6 IT	Intratelencephalic (ILX:0770158)
L6 IT Car3	Intratelencephalic, a specific cell type expressing the gene Car3 in mouse (ILX:0770159)
L5 ET	Extratelencephalic; also known as CF (corticofugal), PT (pyramidal tract), or SC (subcortical) (ILX:0770160)
L5/6 NP	Near-projecting (ILX:0770161)
L6 CT	Corticothalamic (ILX:0770162)
L6b	(ILX:0770163)
OPC	Oligodendrocyte precursor cell (ILX:0770139)
Astrocyte	Astrocyte (often abbreviated “Astro”) (ILX:0770141)
Oligodendrocyte	Oligodendrocyte (often abbreviated “Oligo”) (ILX:0770140)
Endothelial	Endothelial cell (often abbreviated “Endo”) (ILX:0770142)
VLMC	Vascular leptomeningeal cell (ILX:0770143)
SMC	Smooth muscle cell (ILX:0770144)
Pericyte	Pericyte (often abbreviated “Peri”) (ILX:0770145)
Microglia	Microglia (often abbreviated “Micro”) (ILX:0770146)
PVM	Perivascular macrophage (ILX:0770147)
Microglia-PVM	Microglia (often abbreviated “Micro”) / Perivascular macrophage
GABAergic	Typically inhibitory (ILX:0770098)
Glutamatergic	Typically excitatory (ILX:0770097)
Non-neuronal	Sometimes abbreviated “NN”; also referred to as “glia” in cases when no non-neuronal, non-glial cell types are included (ILX:0770099)
CGE/PoA	Caudal ganglionic eminence / Preoptic area
MGE	Medial ganglionic eminence
IT projecting	(ILX:0770100)
Non-IT projecting
Oligodendrocyte-OPC	Oligodendrocyte (often abbreviated “Oligo”) / Oligodendrocyte precursor cell
Other NN	Cells other than neurons, astrocytes, OPCs, or oligodendrocytes; also referred to as non-neural brain cell (ILX:0770187)

## Sheet: Legend
Supplementary Table 1: A set of aliases in mammalian M1, reproduced from (Bakken et al., 2020). These terms are also applicable to other cortical areas, representing a starting point for future cell type classification efforts and for ontology curation. InterLex Identifiers are provided in parentheses when available (BRAIN Initiative Cell Census Network (BICCN) et al., 2020).
